# Supplementary material
Source: Research Square preprint supplement (doi:10.21203/rs.3.rs-10235713/v1)
Supplement: Supplementary file 1 [file 67525880ded7268bb536900a.xlsx]

## Sheet: Supplemental Data Legend
Supplementary Data 1	The complete result table (R2) for single-ancestry simulation analysis.
Supplementary Data 2	The complete result table (R2) for cross-ancestry simulation analysis.
Supplementary Data 3	The complete result table (R2) for single-ancestry analysis in UKB cohort.
Supplementary Data 4	The complete result table (R2) for single-ancestry analysis in DFTJ cohort.
Supplementary Data 5	The complete result table (R2) for cross-ancestry analysis in DFTJ cohort.
Supplementary Data 6	The complete result table (R2) for cross-ancestry analysis in UKB cohort.
Supplementary Data 7	The complete result table (R2) for different theta values in single-ancestry simulation analysis.
Supplementary Data 8	The complete result table (R2) for different combinations of lambda0 and lambda1 in single-ancestry simulation analysis.
Detail in Supplemental Data 2
rho=1	causal SNPs proportions is 0.01
rho=2	causal SNPs proportions is 0.001
rho=3	causal SNPs proportions is 0.0005
size=1	training GWAS sample size is 15,000
size=3	training GWAS sample size is 80,000
GA=1	constant genome-wide heritability, and cross-ancestry genetic architecture is 0.8.
GA=2	constant per-SNP heritability, and cross-ancestry genetic architecture is 0.8.
GA=3	constant per-SNP heritability, and cross-ancestry genetic architecture is 0.6.

## Sheet: Supplemental Data 1
Label	GWAS	Heritability	Model	Methods	Mean	SE	Rank	Improvement_pentage ((SSL Mean – Method Mean) / Method Mean × 100%)
Sparse II	100000	0.5	Sparse	C+T	0.366095	0.00573159	6	10.7793
Sparse II	100000	0.5	Sparse	uaPGS	0.145126	0.00246417	10	179.453
Sparse II	100000	0.5	Sparse	LDpred2_inf	0.172945	0.00295295	9	134.501
Sparse II	100000	0.5	Sparse	LDpred2_auto	0.195455	0.00445803	8	107.494
Sparse II	100000	0.5	Sparse	PRS-CS	0.404388	0.00360257	3	0.289447
Sparse II	100000	0.5	Sparse	PRS-CSauto	0.384757	0.00405002	4	5.40616
Sparse II	100000	0.5	Sparse	Lassosum	0.291544	0.00451653	7	39.1071
Sparse II	100000	0.5	Sparse	Lassosum2	0.428103	0.00400025	1	-5.26634
Sparse II	100000	0.5	Sparse	SSL	0.405558	0.00396312	2	0
Sparse II	100000	0.5	Sparse	Allsum	0.36749	0.00433995	5	10.3589
Sparse I	100000	0.5	Sparse	C+T	0.182438	0.00395799	7	32.4309
Sparse I	100000	0.5	Sparse	uaPGS	0.149365	0.0023322	10	61.7551
Sparse I	100000	0.5	Sparse	LDpred2_inf	0.17851	0.00267571	9	35.3449
Sparse I	100000	0.5	Sparse	LDpred2_auto	0.17973	0.00267746	8	34.4264
Sparse I	100000	0.5	Sparse	PRS-CS	0.234475	0.00314148	4	3.04061
Sparse I	100000	0.5	Sparse	PRS-CSauto	0.23579	0.00292239	3	2.46631
Sparse I	100000	0.5	Sparse	Lassosum	0.19829	0.00338741	6	21.8443
Sparse I	100000	0.5	Sparse	Lassosum2	0.243506	0.00376575	1	-0.780819
Sparse I	100000	0.5	Sparse	SSL	0.241605	0.00342001	2	0
Sparse I	100000	0.5	Sparse	Allsum	0.219014	0.00356157	5	10.3148
Sparse III	100000	0.5	Sparse	C+T	0.136183	0.00199828	10	32.9492
Sparse III	100000	0.5	Sparse	uaPGS	0.151944	0.00301802	9	19.1591
Sparse III	100000	0.5	Sparse	LDpred2_inf	0.178445	0.0024652	4	1.46235
Sparse III	100000	0.5	Sparse	LDpred2_auto	0.178917	0.00249058	3	1.19502
Sparse III	100000	0.5	Sparse	PRS-CS	0.174848	0.00194382	6	3.5499
Sparse III	100000	0.5	Sparse	PRS-CSauto	0.17719	0.00254759	5	2.18099
Sparse III	100000	0.5	Sparse	Lassosum	0.174189	0.00243484	7	3.94121
Sparse III	100000	0.5	Sparse	Lassosum2	0.163517	0.00226286	8	10.7255
Sparse III	100000	0.5	Sparse	SSL	0.181055	0.00230183	1	0
Sparse III	100000	0.5	Sparse	Allsum	0.180274	0.00252729	2	0.433239
Infinitesimal	100000	0.5	Infinitesimal	C+T	0.129852	0.00160193	10	34.0193
Infinitesimal	100000	0.5	Infinitesimal	uaPGS	0.14994	0.00184445	8	16.0642
Infinitesimal	100000	0.5	Infinitesimal	LDpred2_inf	0.177867	0.00249369	3	-2.15892
Infinitesimal	100000	0.5	Infinitesimal	LDpred2_auto	0.17816	0.00246992	1	-2.32019
Infinitesimal	100000	0.5	Infinitesimal	PRS-CS	0.169859	0.0026437	6	2.45363
Infinitesimal	100000	0.5	Infinitesimal	PRS-CSauto	0.161062	0.0024681	7	8.04962
Infinitesimal	100000	0.5	Infinitesimal	Lassosum	0.170021	0.00233754	5	2.35621
Infinitesimal	100000	0.5	Infinitesimal	Lassosum2	0.142349	0.00204099	9	22.2538
Infinitesimal	100000	0.5	Infinitesimal	SSL	0.174027	0.00260602	4	0
Infinitesimal	100000	0.5	Infinitesimal	Allsum	0.178066	0.00261452	2	-2.26853
Hybrid I	100000	0.5	Hybrid	C+T	0.137063	0.00209566	10	42.0842
Hybrid I	100000	0.5	Hybrid	uaPGS	0.149273	0.00255027	9	30.4625
Hybrid I	100000	0.5	Hybrid	LDpred2_inf	0.17986	0.00211864	6	8.27613
Hybrid I	100000	0.5	Hybrid	LDpred2_auto	0.180653	0.00212106	5	7.80087
Hybrid I	100000	0.5	Hybrid	PRS-CS	0.192253	0.00281803	3	1.29608
Hybrid I	100000	0.5	Hybrid	PRS-CSauto	0.192281	0.00260009	2	1.2815
Hybrid I	100000	0.5	Hybrid	Lassosum	0.176015	0.00268915	8	10.6409
Hybrid I	100000	0.5	Hybrid	Lassosum2	0.179828	0.00219753	7	8.29536
Hybrid I	100000	0.5	Hybrid	SSL	0.194745	0.00238492	1	0
Hybrid I	100000	0.5	Hybrid	Allsum	0.187777	0.00235111	4	3.71102
Hybrid II	100000	0.5	Hybrid	C+T	0.132383	0.00178566	10	34.672
Hybrid II	100000	0.5	Hybrid	uaPGS	0.144109	0.00214096	9	23.7141
Hybrid II	100000	0.5	Hybrid	LDpred2_inf	0.175826	0.00224165	4	1.3975
Hybrid II	100000	0.5	Hybrid	LDpred2_auto	0.176319	0.00228164	3	1.11386
Hybrid II	100000	0.5	Hybrid	PRS-CS	0.172768	0.00206257	6	3.19182
Hybrid II	100000	0.5	Hybrid	PRS-CSauto	0.173939	0.0019471	5	2.4975
Hybrid II	100000	0.5	Hybrid	Lassosum	0.168754	0.00179604	7	5.64665
Hybrid II	100000	0.5	Hybrid	Lassosum2	0.160367	0.00174039	8	11.1719
Hybrid II	100000	0.5	Hybrid	SSL	0.178283	0.00189102	1	0
Hybrid II	100000	0.5	Hybrid	Allsum	0.178136	0.00198228	2	0.0825967
Hybrid III	100000	0.5	Hybrid	C+T	0.130046	0.00188527	10	34.2599
Hybrid III	100000	0.5	Hybrid	uaPGS	0.143354	0.00277568	9	21.7958
Hybrid III	100000	0.5	Hybrid	LDpred2_inf	0.171419	0.00182995	4	1.85568
Hybrid III	100000	0.5	Hybrid	LDpred2_auto	0.171567	0.00184379	3	1.76748
Hybrid III	100000	0.5	Hybrid	PRS-CS	0.170828	0.00219737	6	2.20805
Hybrid III	100000	0.5	Hybrid	PRS-CSauto	0.170952	0.00225847	5	2.13401
Hybrid III	100000	0.5	Hybrid	Lassosum	0.166922	0.00236098	7	4.59989
Hybrid III	100000	0.5	Hybrid	Lassosum2	0.154598	0.00281418	8	12.938
Hybrid III	100000	0.5	Hybrid	SSL	0.1746	0.0026329	1	0
Hybrid III	100000	0.5	Hybrid	Allsum	0.174161	0.00223498	2	0.252213
Hybrid IV	100000	0.5	Hybrid	C+T	0.130523	0.000886631	10	34.0226
Hybrid IV	100000	0.5	Hybrid	uaPGS	0.148609	0.001585	9	17.7112
Hybrid IV	100000	0.5	Hybrid	LDpred2_inf	0.179173	0.0016785	2	-2.36792
Hybrid IV	100000	0.5	Hybrid	LDpred2_auto	0.179728	0.00158721	1	-2.66941
Hybrid IV	100000	0.5	Hybrid	PRS-CS	0.171067	0.00151618	5	2.25813
Hybrid IV	100000	0.5	Hybrid	PRS-CSauto	0.165942	0.00165047	7	5.41634
Hybrid IV	100000	0.5	Hybrid	Lassosum	0.170473	0.0015413	6	2.61461
Hybrid IV	100000	0.5	Hybrid	Lassosum2	0.150847	0.00142711	8	15.9651
Hybrid IV	100000	0.5	Hybrid	SSL	0.17493	0.00163704	4	0
Hybrid IV	100000	0.5	Hybrid	Allsum	0.178508	0.00142603	3	-2.00452
Heritability = 0.2	100000	0.2	Sparse	C+T	0.0334929	0.00160579	10	56.1323
Heritability = 0.2	100000	0.2	Sparse	uaPGS	0.0403798	0.00126987	9	29.5035
Heritability = 0.2	100000	0.2	Sparse	LDpred2_inf	0.0433149	0.00135086	7	20.728
Heritability = 0.2	100000	0.2	Sparse	LDpred2_auto	0.0438981	0.0013623	6	19.1241
Heritability = 0.2	100000	0.2	Sparse	PRS-CS	0.0411889	0.00145545	8	26.9593
Heritability = 0.2	100000	0.2	Sparse	PRS-CSauto	0.0514261	0.00187087	2	1.68616
Heritability = 0.2	100000	0.2	Sparse	Lassosum	0.0479972	0.00165907	5	8.95039
Heritability = 0.2	100000	0.2	Sparse	Lassosum2	0.0488418	0.00201227	4	7.06643
Heritability = 0.2	100000	0.2	Sparse	SSL	0.0522932	0.00198318	1	0
Heritability = 0.2	100000	0.2	Sparse	Allsum	0.0494257	0.00181157	3	5.80158
GWAS N = 10,000	10000	0.5	Sparse	C+T	0.0200698	0.00127008	10	74.8542
GWAS N = 10,000	10000	0.5	Sparse	uaPGS	0.0358579	0.00132586	3	-2.13343
GWAS N = 10,000	10000	0.5	Sparse	LDpred2_inf	0.0357364	0.0013012	4	-1.80059
GWAS N = 10,000	10000	0.5	Sparse	LDpred2_auto	0.0366114	0.00129565	2	-4.14747
GWAS N = 10,000	10000	0.5	Sparse	PRS-CS	0.034802	0.00145411	7	0.836018
GWAS N = 10,000	10000	0.5	Sparse	PRS-CSauto	0.0344689	0.0015279	8	1.81038
GWAS N = 10,000	10000	0.5	Sparse	Lassosum	0.034814	0.00128077	6	0.801254
GWAS N = 10,000	10000	0.5	Sparse	Lassosum2	0.0244844	0.00128233	9	43.3278
GWAS N = 10,000	10000	0.5	Sparse	SSL	0.0350929	0.00126761	5	0
GWAS N = 10,000	10000	0.5	Sparse	Allsum	0.0366901	0.00134351	1	-4.35317
GWAS N = 50,000	50000	0.5	Sparse	C+T	0.10131	0.000975044	10	50.2675
GWAS N = 50,000	50000	0.5	Sparse	uaPGS	0.108498	0.00229462	9	40.3126
GWAS N = 50,000	50000	0.5	Sparse	LDpred2_inf	0.119461	0.00223117	8	27.4361
GWAS N = 50,000	50000	0.5	Sparse	LDpred2_auto	0.12079	0.00221105	7	26.0341
GWAS N = 50,000	50000	0.5	Sparse	PRS-CS	0.146304	0.0022354	3	3.89653
GWAS N = 50,000	50000	0.5	Sparse	PRS-CSauto	0.146333	0.00200374	2	4.03429
GWAS N = 50,000	50000	0.5	Sparse	Lassosum	0.136863	0.00190697	6	11.2323
GWAS N = 50,000	50000	0.5	Sparse	Lassosum2	0.143698	0.0018437	4	5.94208
GWAS N = 50,000	50000	0.5	Sparse	SSL	0.152236	0.00186708	1	0
GWAS N = 50,000	50000	0.5	Sparse	Allsum	0.137268	0.00232156	4	10.9042

## Sheet: Supplemental Data 2
Methods	Population	rho	size	GA	Mean	Se	Rank	Improvement_pentage ((pSSL Mean – Method Mean) / Method Mean × 100%)
C+T	EAS	1	1	1	0.0142617	0.00056386	10	235.989
Lassosum2	EAS	1	1	1	0.0242819	0.000636451	7	97.3395
SSL	EAS	1	1	1	0.0211978	0.000581293	8	126.051
C+T_EUR	EAS	1	1	1	0.0167666	0.000893737	9	185.793
Lassosum2_EUR	EAS	1	1	1	0.0333157	0.00101033	6	43.8295
SSL_EUR	EAS	1	1	1	0.033981	0.000908343	5	41.0135
PRS-CSx	EAS	1	1	1	0.0493033	0.00135266	1	-2.81023
CT-SLEB	EAS	1	1	1	0.0452497	0.00126514	4	5.89622
PROSPER	EAS	1	1	1	0.0489859	0.00123422	2	-2.18047
pSSL	EAS	1	1	1	0.0479177	0.00108745	3	0
C+T	EAS	1	1	2	0.00284997	0.000349022	10	249.854
Lassosum2	EAS	1	1	2	0.00490909	0.000382062	7	103.108
SSL	EAS	1	1	2	0.00337811	0.000422025	9	195.157
C+T_EUR	EAS	1	1	2	0.00374856	0.000357681	8	165.988
Lassosum2_EUR	EAS	1	1	2	0.00763249	0.000391829	5	30.6355
SSL_EUR	EAS	1	1	2	0.0070365	0.000616581	6	41.7003
PRS-CSx	EAS	1	1	2	0.0109721	0.000407502	1	-9.1261
CT-SLEB	EAS	1	1	2	0.00936822	0.0005572	4	6.43147
PROSPER	EAS	1	1	2	0.0109195	0.000486849	2	-8.68851
pSSL	EAS	1	1	2	0.00997074	0.000453163	3	0
C+T	EAS	1	1	3	0.00288092	0.000373706	9	152.598
Lassosum2	EAS	1	1	3	0.00421272	0.000594135	7	72.7425
SSL	EAS	1	1	3	0.0032388	0.000424734	8	124.687
C+T_EUR	EAS	1	1	3	0.00255638	0.000379408	10	184.666
Lassosum2_EUR	EAS	1	1	3	0.00524201	0.000354838	5	38.824
SSL_EUR	EAS	1	1	3	0.0047492	0.000359607	6	53.2293
PRS-CSx	EAS	1	1	3	0.00864772	0.000521203	1	-15.8487
CT-SLEB	EAS	1	1	3	0.00725969	0.000445761	4	0.240753
PROSPER	EAS	1	1	3	0.0081315	0.00052458	2	-10.5065
pSSL	EAS	1	1	3	0.00727717	0.000388039	3	0
C+T	EAS	1	3	1	0.059929	0.00119732	7	62.68
Lassosum2	EAS	1	3	1	0.0861559	0.00104824	5	13.1583
SSL	EAS	1	3	1	0.084226	0.00100898	6	15.7511
C+T_EUR	EAS	1	3	1	0.0167666	0.000893737	10	481.47
Lassosum2_EUR	EAS	1	3	1	0.0333157	0.00101033	9	192.633
SSL_EUR	EAS	1	3	1	0.033981	0.000908343	8	186.903
PRS-CSx	EAS	1	3	1	0.0973897	0.000868509	2	0.105519
CT-SLEB	EAS	1	3	1	0.0911695	0.00135863	4	6.93548
PROSPER	EAS	1	3	1	0.095249	0.000930451	3	2.35541
pSSL	EAS	1	3	1	0.0974925	0.00118938	1	0
C+T	EAS	1	3	2	0.0129543	0.000655052	7	73.7818
Lassosum2	EAS	1	3	2	0.0206544	0.000592564	5	8.99418
SSL	EAS	1	3	2	0.0185161	0.00090031	6	21.5818
C+T_EUR	EAS	1	3	2	0.00374856	0.000357681	10	500.554
Lassosum2_EUR	EAS	1	3	2	0.00763249	0.000391829	8	194.952
SSL_EUR	EAS	1	3	2	0.0070365	0.000616581	9	219.934
PRS-CSx	EAS	1	3	2	0.0245713	0.00048162	1	-8.38048
CT-SLEB	EAS	1	3	2	0.0220967	0.00071833	4	1.88001
PROSPER	EAS	1	3	2	0.0236846	0.000587257	2	-4.95033
pSSL	EAS	1	3	2	0.0225121	0.000891168	3	0
C+T	EAS	1	3	3	0.011825	0.000462454	7	71.7516
Lassosum2	EAS	1	3	3	0.0190867	0.000924618	5	6.40713
SSL	EAS	1	3	3	0.0172179	0.000954209	6	17.9561
C+T_EUR	EAS	1	3	3	0.00255638	0.000379408	10	694.466
Lassosum2_EUR	EAS	1	3	3	0.00524201	0.000354838	8	287.439
SSL_EUR	EAS	1	3	3	0.0047492	0.000359607	9	327.642
PRS-CSx	EAS	1	3	3	0.0223744	0.000950174	1	-9.22823
CT-SLEB	EAS	1	3	3	0.0196616	0.00091364	4	3.2959
PROSPER	EAS	1	3	3	0.021007	0.00103492	2	-3.32008
pSSL	EAS	1	3	3	0.0203096	0.000993924	3	0
C+T	EAS	2	1	1	0.0129533	0.000738877	10	504.478
Lassosum2	EAS	2	1	1	0.0243997	0.00104391	9	220.905
SSL	EAS	2	1	1	0.025166	0.00121058	8	211.134
C+T_EUR	EAS	2	1	1	0.0407948	0.000644286	7	91.9362
Lassosum2_EUR	EAS	2	1	1	0.0550356	0.00178104	6	42.2717
SSL_EUR	EAS	2	1	1	0.0598367	0.00125311	5	30.8562
PRS-CSx	EAS	2	1	1	0.0761598	0.0013326	3	2.81016
CT-SLEB	EAS	2	1	1	0.0783958	0.00153315	1	-0.12215
PROSPER	EAS	2	1	1	0.0711328	0.00148604	4	10.0758
pSSL	EAS	2	1	1	0.0783	0.00172862	2	0
C+T	EAS	2	1	2	0.00253219	0.000424875	10	677.212
Lassosum2	EAS	2	1	2	0.00520843	0.00047205	8	277.859
SSL	EAS	2	1	2	0.00412496	0.000453173	9	377.108
C+T_EUR	EAS	2	1	2	0.00732394	0.000651926	7	168.715
Lassosum2_EUR	EAS	2	1	2	0.0130494	0.000679272	6	50.8151
SSL_EUR	EAS	2	1	2	0.0139109	0.000625863	5	41.4754
PRS-CSx	EAS	2	1	2	0.0180039	0.00074512	2	9.31267
CT-SLEB	EAS	2	1	2	0.0179995	0.000933586	3	9.33896
PROSPER	EAS	2	1	2	0.0173261	0.000658347	4	13.5886
pSSL	EAS	2	1	2	0.0196805	0.000926411	1	0
C+T	EAS	2	1	3	0.00204499	0.000266133	10	516.721
Lassosum2	EAS	2	1	3	0.00441934	0.000440682	7	185.379
SSL	EAS	2	1	3	0.00260865	0.000377833	9	383.464
C+T_EUR	EAS	2	1	3	0.00400753	0.000368732	8	214.704
Lassosum2_EUR	EAS	2	1	3	0.0078146	0.000592064	5	61.3887
SSL_EUR	EAS	2	1	3	0.00743166	0.000479818	6	69.7048
PRS-CSx	EAS	2	1	3	0.0120486	0.000633442	2	4.67542
CT-SLEB	EAS	2	1	3	0.011385	0.000662554	3	10.776
PROSPER	EAS	2	1	3	0.0108705	0.000609717	4	16.0199
pSSL	EAS	2	1	3	0.0126119	0.000460681	1	0
C+T	EAS	2	3	1	0.090154	0.00112004	7	63.3438
Lassosum2	EAS	2	3	1	0.120189	0.00134131	6	22.5244
SSL	EAS	2	3	1	0.126182	0.00177385	5	16.7052
C+T_EUR	EAS	2	3	1	0.0407948	0.000644286	10	260.98
Lassosum2_EUR	EAS	2	3	1	0.0550356	0.00178104	9	167.574
SSL_EUR	EAS	2	3	1	0.0598367	0.00125311	8	146.105
PRS-CSx	EAS	2	3	1	0.147462	0.00156266	1	-0.136527
CT-SLEB	EAS	2	3	1	0.142019	0.00208697	3	3.69101
PROSPER	EAS	2	3	1	0.140414	0.00228611	4	4.87604
pSSL	EAS	2	3	1	0.147261	0.00207851	2	0
C+T	EAS	2	3	2	0.014316	0.000845874	7	162.098
Lassosum2	EAS	2	3	2	0.023844	0.000969699	6	57.3645
SSL	EAS	2	3	2	0.0245397	0.000809247	5	52.9028
C+T_EUR	EAS	2	3	2	0.00732394	0.000651926	10	412.319
Lassosum2_EUR	EAS	2	3	2	0.0130494	0.000679272	9	187.537
SSL_EUR	EAS	2	3	2	0.0139109	0.000625863	8	169.73
PRS-CSx	EAS	2	3	2	0.0362344	0.00115319	2	3.55345
CT-SLEB	EAS	2	3	2	0.035375	0.00108553	3	6.06919
PROSPER	EAS	2	3	2	0.0329073	0.0010602	4	14.0232
pSSL	EAS	2	3	2	0.0375219	0.00099368	1	0
C+T	EAS	2	3	3	0.0143913	0.000885445	7	123.325
Lassosum2	EAS	2	3	3	0.0238178	0.00121887	6	34.9379
SSL	EAS	2	3	3	0.0240578	0.00106529	5	33.5919
C+T_EUR	EAS	2	3	3	0.00400753	0.000368732	10	701.972
Lassosum2_EUR	EAS	2	3	3	0.0078146	0.000592064	8	311.272
SSL_EUR	EAS	2	3	3	0.00743166	0.000479818	9	332.464
PRS-CSx	EAS	2	3	3	0.0315068	0.00135314	2	2.00748
CT-SLEB	EAS	2	3	3	0.0307585	0.000917518	3	4.48927
PROSPER	EAS	2	3	3	0.0295203	0.000953184	4	8.87175
pSSL	EAS	2	3	3	0.0321393	0.00110677	1	0
C+T	EAS	3	1	1	0.0169045	0.000672308	10	527.928
Lassosum2	EAS	3	1	1	0.0324596	0.000596401	9	227.016
SSL	EAS	3	1	1	0.0369068	0.000776094	8	187.612
C+T_EUR	EAS	3	1	1	0.0610941	0.00169006	7	73.7456
Lassosum2_EUR	EAS	3	1	1	0.0800468	0.00158544	6	32.6078
SSL_EUR	EAS	3	1	1	0.0877801	0.00157775	5	20.9253
PRS-CSx	EAS	3	1	1	0.10088	0.00170117	3	5.22197
CT-SLEB	EAS	3	1	1	0.108598	0.00186771	1	-2.25564
PROSPER	EAS	3	1	1	0.0954894	0.0016671	4	11.1625
pSSL	EAS	3	1	1	0.106148	0.00137921	2	0
C+T	EAS	3	1	2	0.00231069	0.000289171	10	1118.47
Lassosum2	EAS	3	1	2	0.00501575	0.00053733	8	461.333
SSL	EAS	3	1	2	0.00470638	0.000440567	9	498.232
C+T_EUR	EAS	3	1	2	0.0145225	0.000472614	7	93.872
Lassosum2_EUR	EAS	3	1	2	0.0215111	0.000595091	6	30.8859
SSL_EUR	EAS	3	1	2	0.0225291	0.000679203	5	24.9718
PRS-CSx	EAS	3	1	2	0.0244379	0.000671784	3	15.2104
CT-SLEB	EAS	3	1	2	0.0279299	0.00132248	2	0.806173
PROSPER	EAS	3	1	2	0.0226704	0.000953619	4	24.1928
pSSL	EAS	3	1	2	0.028155	0.000896726	1	0
C+T	EAS	3	1	3	0.00263143	0.000274564	10	627.813
Lassosum2	EAS	3	1	3	0.00500539	0.00033553	8	282.625
SSL	EAS	3	1	3	0.00409809	0.000435689	9	367.336
C+T_EUR	EAS	3	1	3	0.00904192	0.000757476	7	111.812
Lassosum2_EUR	EAS	3	1	3	0.0133124	0.000671726	6	43.8644
SSL_EUR	EAS	3	1	3	0.0136117	0.000578075	5	40.7011
PRS-CSx	EAS	3	1	3	0.0168329	0.000597459	3	13.7766
CT-SLEB	EAS	3	1	3	0.019559	0.000666101	1	-2.08132
PROSPER	EAS	3	1	3	0.0166223	0.000792877	4	15.218
pSSL	EAS	3	1	3	0.0191519	0.000817091	2	0
C+T	EAS	3	3	1	0.121694	0.00228193	7	48.1704
Lassosum2	EAS	3	3	1	0.174715	0.00209331	4	3.20443
SSL	EAS	3	3	1	0.170303	0.00243717	5	5.87843
C+T_EUR	EAS	3	3	1	0.0610941	0.00169006	10	195.141
Lassosum2_EUR	EAS	3	3	1	0.0800468	0.00158544	9	125.261
SSL_EUR	EAS	3	3	1	0.0877801	0.00157775	8	105.416
PRS-CSx	EAS	3	3	1	0.180319	0.00205786	1	-0.00291367
CT-SLEB	EAS	3	3	1	0.176314	0.00232435	3	2.26891
PROSPER	EAS	3	3	1	0.170281	0.00181085	6	5.8922
pSSL	EAS	3	3	1	0.180314	0.00240776	2	0
C+T	EAS	3	3	2	0.0227247	0.00129494	7	120.053
Lassosum2	EAS	3	3	2	0.0362624	0.00158219	6	37.9018
SSL	EAS	3	3	2	0.0368828	0.00162048	5	35.582
C+T_EUR	EAS	3	3	2	0.0145225	0.000472614	10	244.338
Lassosum2_EUR	EAS	3	3	2	0.0215111	0.000595091	9	132.468
SSL_EUR	EAS	3	3	2	0.0225291	0.000679203	8	121.964
PRS-CSx	EAS	3	3	2	0.0463234	0.00143028	3	7.95064
CT-SLEB	EAS	3	3	2	0.0478323	0.00165795	2	4.54539
PROSPER	EAS	3	3	2	0.0460917	0.00171201	4	8.49332
pSSL	EAS	3	3	2	0.0500064	0.00168526	1	0
C+T	EAS	3	3	3	0.0244704	0.000956839	7	93.4477
Lassosum2	EAS	3	3	3	0.0371748	0.00141608	6	27.3378
SSL	EAS	3	3	3	0.0393584	0.00155115	5	20.2729
C+T_EUR	EAS	3	3	3	0.00904192	0.000757476	10	423.534
Lassosum2_EUR	EAS	3	3	3	0.0133124	0.000671726	9	255.589
SSL_EUR	EAS	3	3	3	0.0136117	0.000578075	8	247.77
PRS-CSx	EAS	3	3	3	0.0432756	0.00131389	4	9.38613
CT-SLEB	EAS	3	3	3	0.0467417	0.00122736	2	1.27462
PROSPER	EAS	3	3	3	0.0438563	0.00165672	3	7.93786
pSSL	EAS	3	3	3	0.0473375	0.00156514	1	0
C+T	AFR	1	1	1	0.00557201	0.00036494	9	246.098
Lassosum2	AFR	1	1	1	0.00956407	0.000508543	7	101.636
SSL	AFR	1	1	1	0.0076483	0.00053923	8	152.143
C+T_EUR	AFR	1	1	1	0.00450474	0.000323234	10	328.096
Lassosum2_EUR	AFR	1	1	1	0.0119962	0.000562806	6	60.756
SSL_EUR	AFR	1	1	1	0.0125928	0.00070876	5	53.1402
PRS-CSx	AFR	1	1	1	0.0179876	0.000571947	3	7.21036
CT-SLEB	AFR	1	1	1	0.016304	0.000862892	4	18.2813
PROSPER	AFR	1	1	1	0.019004	0.000755875	2	1.47677
pSSL	AFR	1	1	1	0.0192846	0.000799618	1	0
C+T	AFR	1	1	2	0.00355184	0.000275267	9	210.234
Lassosum2	AFR	1	1	2	0.00624344	0.000357248	5	76.4896
SSL	AFR	1	1	2	0.00464486	0.000205795	8	137.23
C+T_EUR	AFR	1	1	2	0.00157029	0.000246197	10	601.717
Lassosum2_EUR	AFR	1	1	2	0.0062128	0.000421258	6	77.3601
SSL_EUR	AFR	1	1	2	0.00608046	0.000445399	7	81.2201
PRS-CSx	AFR	1	1	2	0.0102718	0.000594302	3	7.27446
CT-SLEB	AFR	1	1	2	0.00859642	0.000465403	4	28.1815
PROSPER	AFR	1	1	2	0.0104557	0.000651093	2	5.38772
pSSL	AFR	1	1	2	0.011019	0.000525009	1	0
C+T	AFR	1	1	3	0.00419701	0.000469508	7	106.427
Lassosum2	AFR	1	1	3	0.0066535	0.000567596	5	30.2132
SSL	AFR	1	1	3	0.0056594	0.000550381	6	53.0858
C+T_EUR	AFR	1	1	3	0.000769988	0.000226615	10	1025.18
Lassosum2_EUR	AFR	1	1	3	0.00328927	0.000446373	8	163.394
SSL_EUR	AFR	1	1	3	0.00269859	0.000323176	9	221.047
PRS-CSx	AFR	1	1	3	0.00808938	0.000752755	2	7.10014
CT-SLEB	AFR	1	1	3	0.00692623	0.000633857	4	25.0859
PROSPER	AFR	1	1	3	0.0078933	0.000566511	3	9.76076
pSSL	AFR	1	1	3	0.00866374	0.000750122	1	0
C+T	AFR	1	3	1	0.0267437	0.000751426	7	61.6846
Lassosum2	AFR	1	3	1	0.0388737	0.000794177	4	11.2329
SSL	AFR	1	3	1	0.0361608	0.00101248	6	19.5782
C+T_EUR	AFR	1	3	1	0.00450474	0.000323234	10	859.887
Lassosum2_EUR	AFR	1	3	1	0.0119962	0.000562806	9	260.451
SSL_EUR	AFR	1	3	1	0.0125928	0.00070876	8	243.374
PRS-CSx	AFR	1	3	1	0.0419652	0.0010016	2	3.03864
CT-SLEB	AFR	1	3	1	0.0379762	0.000925277	5	13.862
PROSPER	AFR	1	3	1	0.0414113	0.00069165	3	4.41706
pSSL	AFR	1	3	1	0.0432404	0.00108744	1	0
C+T	AFR	1	3	2	0.0192119	0.000720214	7	60.2184
Lassosum2	AFR	1	3	2	0.0286649	0.000893982	4	7.38231
SSL	AFR	1	3	2	0.0273681	0.000972235	5	12.4707
C+T_EUR	AFR	1	3	2	0.00157029	0.000246197	10	1860.21
Lassosum2_EUR	AFR	1	3	2	0.0062128	0.000421258	8	395.446
SSL_EUR	AFR	1	3	2	0.00608046	0.000445399	9	406.229
PRS-CSx	AFR	1	3	2	0.0292929	0.00111766	2	5.08049
CT-SLEB	AFR	1	3	2	0.025937	0.00109383	6	18.6763
PROSPER	AFR	1	3	2	0.0287573	0.00108314	3	7.03746
pSSL	AFR	1	3	2	0.0307811	0.00107101	1	0
C+T	AFR	1	3	3	0.0195879	0.000791011	7	44.955
Lassosum2	AFR	1	3	3	0.0290397	0.00102914	1	-2.22481
SSL	AFR	1	3	3	0.0273125	0.0009379	4	3.95844
C+T_EUR	AFR	1	3	3	0.000769988	0.000226615	10	3587.54
Lassosum2_EUR	AFR	1	3	3	0.00328927	0.000446373	8	763.221
SSL_EUR	AFR	1	3	3	0.00269859	0.000323176	9	952.165
PRS-CSx	AFR	1	3	3	0.0277678	0.000970691	3	2.25373
CT-SLEB	AFR	1	3	3	0.0247786	0.000849355	6	14.5893
PROSPER	AFR	1	3	3	0.0273074	0.00100717	5	3.97793
pSSL	AFR	1	3	3	0.0283936	0.00104309	2	0
C+T	AFR	2	1	1	0.00575119	0.000615425	10	364.19
Lassosum2	AFR	2	1	1	0.00886916	0.000652	8	201.003
SSL	AFR	2	1	1	0.00829988	0.000627944	9	221.649
C+T_EUR	AFR	2	1	1	0.011392	0.00085253	7	134.345
Lassosum2_EUR	AFR	2	1	1	0.0193236	0.0008672	6	38.1549
SSL_EUR	AFR	2	1	1	0.0215078	0.000858701	5	24.1246
PRS-CSx	AFR	2	1	1	0.0263335	0.00104019	2	1.37846
CT-SLEB	AFR	2	1	1	0.026213	0.000993737	3	1.84417
PROSPER	AFR	2	1	1	0.0243727	0.000793724	4	9.5341
pSSL	AFR	2	1	1	0.0266965	0.000689566	1	0
C+T	AFR	2	1	2	0.00332245	0.00029716	9	321.415
Lassosum2	AFR	2	1	2	0.00548718	0.000258953	7	155.164
SSL	AFR	2	1	2	0.00485455	0.00029399	8	188.416
C+T_EUR	AFR	2	1	2	0.00326984	0.000404621	10	328.194
Lassosum2_EUR	AFR	2	1	2	0.00829064	0.000413307	6	68.8806
SSL_EUR	AFR	2	1	2	0.009256	0.000578556	5	51.2671
PRS-CSx	AFR	2	1	2	0.0128072	0.000495309	3	9.32317
CT-SLEB	AFR	2	1	2	0.0113539	0.00056961	4	23.3167
PROSPER	AFR	2	1	2	0.0128663	0.000532047	2	8.82155
pSSL	AFR	2	1	2	0.0140013	0.000605574	1	0
C+T	AFR	2	1	3	0.00424625	0.000519748	7	125.815
Lassosum2	AFR	2	1	3	0.00610085	0.00053414	5	57.1696
SSL	AFR	2	1	3	0.00585672	0.000353521	6	63.7209
C+T_EUR	AFR	2	1	3	0.00186165	0.000219259	10	415.063
Lassosum2_EUR	AFR	2	1	3	0.00379518	0.000401912	8	152.654
SSL_EUR	AFR	2	1	3	0.00372657	0.000457523	9	157.306
PRS-CSx	AFR	2	1	3	0.00931883	0.000635434	2	2.8957
CT-SLEB	AFR	2	1	3	0.00769532	0.000615639	4	24.6041
PROSPER	AFR	2	1	3	0.00866373	0.000626048	3	10.6761
pSSL	AFR	2	1	3	0.00958868	0.00051759	1	0
C+T	AFR	2	3	1	0.0265151	0.000818018	7	123.482
Lassosum2	AFR	2	3	1	0.0444433	0.00117785	6	33.3303
SSL	AFR	2	3	1	0.045612	0.00132997	5	29.914
C+T_EUR	AFR	2	3	1	0.011392	0.00085253	10	420.16
Lassosum2_EUR	AFR	2	3	1	0.0193236	0.0008672	9	206.653
SSL_EUR	AFR	2	3	1	0.0215078	0.000858701	8	175.511
PRS-CSx	AFR	2	3	1	0.0571601	0.00130406	2	3.66741
CT-SLEB	AFR	2	3	1	0.0525493	0.00114395	4	12.7634
PROSPER	AFR	2	3	1	0.0531518	0.00128893	3	11.4852
pSSL	AFR	2	3	1	0.0592564	0.00112695	1	0
C+T	AFR	2	3	2	0.0160775	0.000685422	7	122.83
Lassosum2	AFR	2	3	2	0.0278614	0.00067026	6	28.5847
SSL	AFR	2	3	2	0.0279707	0.000698049	5	28.0823
C+T_EUR	AFR	2	3	2	0.00326984	0.000404621	10	995.636
Lassosum2_EUR	AFR	2	3	2	0.00829064	0.000413307	9	332.121
SSL_EUR	AFR	2	3	2	0.009256	0.000578556	8	287.052
PRS-CSx	AFR	2	3	2	0.0334005	0.000681412	2	7.26041
CT-SLEB	AFR	2	3	2	0.0306172	0.000579278	4	17.0111
PROSPER	AFR	2	3	2	0.0312317	0.000794414	3	14.7088
pSSL	AFR	2	3	2	0.0358255	0.000818652	1	0
C+T	AFR	2	3	3	0.0168443	0.000551579	7	95.9678
Lassosum2	AFR	2	3	3	0.0286405	0.00108661	6	15.2541
SSL	AFR	2	3	3	0.029939	0.000496565	3	10.2554
C+T_EUR	AFR	2	3	3	0.00186165	0.000219259	10	1673.12
Lassosum2_EUR	AFR	2	3	3	0.00379518	0.000401912	8	769.772
SSL_EUR	AFR	2	3	3	0.00372657	0.000457523	9	785.785
PRS-CSx	AFR	2	3	3	0.0309967	0.000954197	2	6.49306
CT-SLEB	AFR	2	3	3	0.0290222	0.000903238	5	13.7382
PROSPER	AFR	2	3	3	0.0295192	0.000790327	4	11.8234
pSSL	AFR	2	3	3	0.0330094	0.00061421	1	0
C+T	AFR	3	1	1	0.00547804	0.000459104	10	589.259
Lassosum2	AFR	3	1	1	0.0089797	0.0006141	8	320.48
SSL	AFR	3	1	1	0.00842924	0.000633766	9	347.939
C+T_EUR	AFR	3	1	1	0.0193646	0.000900458	7	94.9838
Lassosum2_EUR	AFR	3	1	1	0.030109	0.000698752	6	25.4039
SSL_EUR	AFR	3	1	1	0.0316829	0.000642089	5	19.1743
PRS-CSx	AFR	3	1	1	0.0352151	0.000950081	3	7.2207
CT-SLEB	AFR	3	1	1	0.0384009	0.0012177	1	-1.67464
PROSPER	AFR	3	1	1	0.0333691	0.00076101	4	13.1521
pSSL	AFR	3	1	1	0.0377579	0.000939725	2	0
C+T	AFR	3	1	2	0.00364884	0.000401838	10	477.473
Lassosum2	AFR	3	1	2	0.00575029	0.000531423	8	266.435
SSL	AFR	3	1	2	0.00463997	0.000673726	9	354.121
C+T_EUR	AFR	3	1	2	0.00967859	0.000462238	7	117.708
Lassosum2_EUR	AFR	3	1	2	0.0143777	0.000419355	6	46.5541
SSL_EUR	AFR	3	1	2	0.0145484	0.000521568	5	44.8342
PRS-CSx	AFR	3	1	2	0.0179063	0.000714924	3	17.6743
CT-SLEB	AFR	3	1	2	0.0191714	0.000641755	2	9.90908
PROSPER	AFR	3	1	2	0.0174321	0.000543587	4	20.8754
pSSL	AFR	3	1	2	0.0210711	0.000670461	1	0
C+T	AFR	3	1	3	0.00379263	0.000483449	10	314.428
Lassosum2	AFR	3	1	3	0.00642476	0.000508008	7	144.642
SSL	AFR	3	1	3	0.00599392	0.000592122	8	162.227
C+T_EUR	AFR	3	1	3	0.00449753	0.000580444	9	249.474
Lassosum2_EUR	AFR	3	1	3	0.0087023	0.000705682	6	80.6153
SSL_EUR	AFR	3	1	3	0.00895186	0.00076157	5	75.5801
PRS-CSx	AFR	3	1	3	0.0145071	0.000814337	2	8.34505
CT-SLEB	AFR	3	1	3	0.0144385	0.000892099	3	8.85964
PROSPER	AFR	3	1	3	0.0130665	0.000566116	4	20.2903
pSSL	AFR	3	1	3	0.0157177	0.000761416	1	0
C+T	AFR	3	3	1	0.0388596	0.00160057	7	107.737
Lassosum2	AFR	3	3	1	0.0734842	0.00143027	5	9.85468
SSL	AFR	3	3	1	0.0705376	0.00163673	6	14.4437
C+T_EUR	AFR	3	3	1	0.0193646	0.000900458	10	316.873
Lassosum2_EUR	AFR	3	3	1	0.030109	0.000698752	9	168.112
SSL_EUR	AFR	3	3	1	0.0316829	0.000642089	8	154.793
PRS-CSx	AFR	3	3	1	0.0793743	0.00133374	2	1.70278
CT-SLEB	AFR	3	3	1	0.0740589	0.0019782	4	9.00234
PROSPER	AFR	3	3	1	0.0743232	0.00203823	3	8.61467
pSSL	AFR	3	3	1	0.0807259	0.00190514	1	0
C+T	AFR	3	3	2	0.0235959	0.000819516	7	126.966
Lassosum2	AFR	3	3	2	0.0468769	0.000937111	5	14.2454
SSL	AFR	3	3	2	0.0469979	0.00143632	4	13.9512
C+T_EUR	AFR	3	3	2	0.00967859	0.000462238	10	453.332
Lassosum2_EUR	AFR	3	3	2	0.0143777	0.000419355	9	272.485
SSL_EUR	AFR	3	3	2	0.0145484	0.000521568	8	268.114
PRS-CSx	AFR	3	3	2	0.0505569	0.000906926	2	5.92968
CT-SLEB	AFR	3	3	2	0.0480105	0.000945109	3	11.548
PROSPER	AFR	3	3	2	0.0466624	0.000863971	6	14.7706
pSSL	AFR	3	3	2	0.0535547	0.00129629	1	0
C+T	AFR	3	3	3	0.0245326	0.00151627	7	107.689
Lassosum2	AFR	3	3	3	0.0490777	0.00165635	3	3.81814
SSL	AFR	3	3	3	0.0485268	0.00205083	4	4.99673
C+T_EUR	AFR	3	3	3	0.00449753	0.000580444	10	1032.88
Lassosum2_EUR	AFR	3	3	3	0.0087023	0.000705682	9	485.495
SSL_EUR	AFR	3	3	3	0.00895186	0.00076157	8	469.172
PRS-CSx	AFR	3	3	3	0.0495764	0.00153405	2	2.77386
CT-SLEB	AFR	3	3	3	0.0465523	0.0018018	5	9.45
PROSPER	AFR	3	3	3	0.0448974	0.00147514	6	13.4845
pSSL	AFR	3	3	3	0.0509515	0.00178703	1	0
C+T	SAS	1	1	1	0.0139567	0.00122101	10	301.256
Lassosum2	SAS	1	1	1	0.0240499	0.00159109	8	132.857
SSL	SAS	1	1	1	0.0203908	0.00153176	9	174.643
C+T_EUR	SAS	1	1	1	0.02816	0.0029555	7	98.8704
Lassosum2_EUR	SAS	1	1	1	0.045633	0.000622777	5	22.7222
SSL_EUR	SAS	1	1	1	0.0448311	0.000131172	6	24.9175
PRS-CSx	SAS	1	1	1	0.0582334	0.00235357	2	-3.83199
CT-SLEB	SAS	1	1	1	0.0545209	0.00365376	4	2.71629
PROSPER	SAS	1	1	1	0.0588271	0.00143464	1	-4.80263
pSSL	SAS	1	1	1	0.0560019	0.00147073	3	0
C+T	SAS	1	1	2	0.00389754	0.000870324	9	273.472
Lassosum2	SAS	1	1	2	0.00584683	0.000331884	8	148.959
SSL	SAS	1	1	2	0.0035137	0.000742008	10	314.271
C+T_EUR	SAS	1	1	2	0.00723031	0.00122071	7	101.322
Lassosum2_EUR	SAS	1	1	2	0.0128238	0.000852883	5	13.5097
SSL_EUR	SAS	1	1	2	0.0118996	0.00031081	6	22.3253
PRS-CSx	SAS	1	1	2	0.0154369	0.000171805	1	-5.70495
CT-SLEB	SAS	1	1	2	0.0145594	0.000495867	3	-0.0218411
PROSPER	SAS	1	1	2	0.0151576	0.000875388	2	-3.9673
pSSL	SAS	1	1	2	0.0145562	0.000599974	4	0
C+T	SAS	1	1	3	0.00296768	0.000644424	9	208.894
Lassosum2	SAS	1	1	3	0.00491688	0.00103298	7	86.439
SSL	SAS	1	1	3	0.00272198	0.000702563	10	236.776
C+T_EUR	SAS	1	1	3	0.00306275	0.000686727	8	199.306
Lassosum2_EUR	SAS	1	1	3	0.00566994	0.000611711	5	61.677
SSL_EUR	SAS	1	1	3	0.00538077	0.000730509	6	70.3657
PRS-CSx	SAS	1	1	3	0.0103337	0.00181054	1	-11.2905
CT-SLEB	SAS	1	1	3	0.00909344	0.00135431	4	0.808778
PROSPER	SAS	1	1	3	0.00940921	0.00137171	2	-2.57432
pSSL	SAS	1	1	3	0.00916699	0.000682671	3	0
C+T	SAS	1	3	1	0.0641109	0.00119413	7	60.2238
Lassosum2	SAS	1	3	1	0.0885551	0.0019259	5	15.9966
SSL	SAS	1	3	1	0.0817704	0.00195747	6	25.6213
C+T_EUR	SAS	1	3	1	0.02816	0.0029555	10	264.776
Lassosum2_EUR	SAS	1	3	1	0.045633	0.000622777	8	125.102
SSL_EUR	SAS	1	3	1	0.0448311	0.000131172	9	129.129
PRS-CSx	SAS	1	3	1	0.101308	0.00390847	3	1.39463
CT-SLEB	SAS	1	3	1	0.0989872	0.00209057	4	3.77198
PROSPER	SAS	1	3	1	0.10301	0.00103815	1	-0.280798
pSSL	SAS	1	3	1	0.102721	0.000756919	2	0
C+T	SAS	1	3	2	0.0149383	0.00132649	7	79.377
Lassosum2	SAS	1	3	2	0.0227302	0.00124361	5	17.8871
SSL	SAS	1	3	2	0.0192602	0.000795928	6	39.1259
C+T_EUR	SAS	1	3	2	0.00723031	0.00122071	10	270.606
Lassosum2_EUR	SAS	1	3	2	0.0128238	0.000852883	8	108.955
SSL_EUR	SAS	1	3	2	0.0118996	0.00031081	9	125.184
PRS-CSx	SAS	1	3	2	0.0281434	0.000929515	1	-4.78785
CT-SLEB	SAS	1	3	2	0.0267307	0.000444173	4	0.244249
PROSPER	SAS	1	3	2	0.0274908	0.000669078	2	-2.52737
pSSL	SAS	1	3	2	0.026796	0.000751586	3	0
C+T	SAS	1	3	3	0.0130889	0.00181111	7	61.7274
Lassosum2	SAS	1	3	3	0.0197805	0.00258259	5	7.01661
SSL	SAS	1	3	3	0.0172912	0.0018129	6	22.4229
C+T_EUR	SAS	1	3	3	0.00306275	0.000686727	10	591.157
Lassosum2_EUR	SAS	1	3	3	0.00566994	0.000611711	8	273.344
SSL_EUR	SAS	1	3	3	0.00538077	0.000730509	9	293.408
PRS-CSx	SAS	1	3	3	0.0226435	0.00302039	1	-6.51444
CT-SLEB	SAS	1	3	3	0.0211307	0.00233819	4	0.178167
PROSPER	SAS	1	3	3	0.0220025	0.00233909	2	-3.79094
pSSL	SAS	1	3	3	0.0211684	0.00191859	3	0
C+T	SAS	2	1	1	0.0170834	0.00187965	10	426.961
Lassosum2	SAS	2	1	1	0.0274218	0.00269161	8	228.291
SSL	SAS	2	1	1	0.0241374	0.00135242	9	272.961
C+T_EUR	SAS	2	1	1	0.0562747	0.00315491	7	59.9708
Lassosum2_EUR	SAS	2	1	1	0.0749319	0.00332065	5	20.1399
SSL_EUR	SAS	2	1	1	0.0692943	0.00363962	6	29.9141
PRS-CSx	SAS	2	1	1	0.0882107	0.00241123	3	2.05457
CT-SLEB	SAS	2	1	1	0.0931697	0.0027166	1	-3.37729
PROSPER	SAS	2	1	1	0.0816959	7.14521e-05	4	10.1929
pSSL	SAS	2	1	1	0.0900231	0.000853241	2	0
C+T	SAS	2	1	2	0.00359552	0.000201242	10	611.859
Lassosum2	SAS	2	1	2	0.00524503	0.000643213	8	387.986
SSL	SAS	2	1	2	0.00437793	0.000516654	9	484.638
C+T_EUR	SAS	2	1	2	0.0112938	0.000819647	7	126.629
Lassosum2_EUR	SAS	2	1	2	0.0191744	0.00186578	6	33.4853
SSL_EUR	SAS	2	1	2	0.0197484	0.00185106	5	29.6055
PRS-CSx	SAS	2	1	2	0.0242911	0.00214485	3	5.36787
CT-SLEB	SAS	2	1	2	0.0261146	0.0013061	1	-1.98974
PROSPER	SAS	2	1	2	0.0232728	0.00131092	4	9.97819
pSSL	SAS	2	1	2	0.025595	0.00110347	2	0
C+T	SAS	2	1	3	0.00213998	0.000120878	10	580.318
Lassosum2	SAS	2	1	3	0.00475409	0.00105128	8	206.235
SSL	SAS	2	1	3	0.00369573	0.00050063	9	293.932
C+T_EUR	SAS	2	1	3	0.0062938	0.00038172	7	131.318
Lassosum2_EUR	SAS	2	1	3	0.0101943	0.000570081	6	42.8114
SSL_EUR	SAS	2	1	3	0.010276	0.000804149	5	41.6759
PRS-CSx	SAS	2	1	3	0.0146528	0.00157557	1	-0.641979
CT-SLEB	SAS	2	1	3	0.0134779	0.00176443	3	8.01935
PROSPER	SAS	2	1	3	0.0120046	0.000724587	4	21.276
pSSL	SAS	2	1	3	0.0145587	0.000973992	2	0
C+T	SAS	2	3	1	0.089095	0.00337818	7	79.1711
Lassosum2	SAS	2	3	1	0.131117	0.00450534	5	21.7478
SSL	SAS	2	3	1	0.130782	0.00452878	6	22.0596
C+T_EUR	SAS	2	3	1	0.0562747	0.00315491	10	183.667
Lassosum2_EUR	SAS	2	3	1	0.0749319	0.00332065	8	113.037
SSL_EUR	SAS	2	3	1	0.0692943	0.00363962	9	130.369
PRS-CSx	SAS	2	3	1	0.150567	0.00565317	4	6.02071
CT-SLEB	SAS	2	3	1	0.154123	0.00407119	2	3.57474
PROSPER	SAS	2	3	1	0.151657	0.003361	3	5.25902
pSSL	SAS	2	3	1	0.159632	0.00278335	1	0
C+T	SAS	2	3	2	0.0140585	0.00107503	9	215.257
Lassosum2	SAS	2	3	2	0.0264993	0.000439184	5	67.2511
SSL	SAS	2	3	2	0.0246639	0.00207357	6	79.697
C+T_EUR	SAS	2	3	2	0.0112938	0.000819647	10	292.431
Lassosum2_EUR	SAS	2	3	2	0.0191744	0.00186578	8	131.143
SSL_EUR	SAS	2	3	2	0.0197484	0.00185106	7	124.425
PRS-CSx	SAS	2	3	2	0.0425767	0.00229258	2	4.09517
CT-SLEB	SAS	2	3	2	0.0419697	0.00217937	3	5.6007
PROSPER	SAS	2	3	2	0.0382483	0.00231372	4	15.8752
pSSL	SAS	2	3	2	0.0443203	0.00198613	1	0
C+T	SAS	2	3	3	0.0171945	0.00177389	7	124.037
Lassosum2	SAS	2	3	3	0.0304854	0.00325471	5	26.3623
SSL	SAS	2	3	3	0.0285901	0.0027513	6	34.7393
C+T_EUR	SAS	2	3	3	0.0062938	0.00038172	10	512.064
Lassosum2_EUR	SAS	2	3	3	0.0101943	0.000570081	9	277.877
SSL_EUR	SAS	2	3	3	0.010276	0.000804149	8	274.873
PRS-CSx	SAS	2	3	3	0.037859	0.001961	2	1.75138
CT-SLEB	SAS	2	3	3	0.0351102	0.00236	3	9.71775
PROSPER	SAS	2	3	3	0.0345996	0.00235654	4	11.3369
pSSL	SAS	2	3	3	0.0385221	0.00167776	1	0
C+T	SAS	3	1	1	0.0145907	0.00145299	10	645.244
Lassosum2	SAS	3	1	1	0.0270696	0.0026887	9	301.692
SSL	SAS	3	1	1	0.0279147	0.00294077	8	289.531
C+T_EUR	SAS	3	1	1	0.0734083	0.00319864	7	48.1256
Lassosum2_EUR	SAS	3	1	1	0.0915667	0.00166002	5	18.7512
SSL_EUR	SAS	3	1	1	0.0883422	0.00263123	6	23.0855
PRS-CSx	SAS	3	1	1	0.0971905	0.00494385	4	11.8798
CT-SLEB	SAS	3	1	1	0.115869	0.00201431	1	-6.15571
PROSPER	SAS	3	1	1	0.097322	0.000252207	3	11.7286
pSSL	SAS	3	1	1	0.108736	0.00251576	2	0
C+T	SAS	3	1	2	0.0033529	0.000543216	10	838.706
Lassosum2	SAS	3	1	2	0.00576152	0.000618977	8	446.277
SSL	SAS	3	1	2	0.00559655	0.000847612	9	462.38
C+T_EUR	SAS	3	1	2	0.0180316	0.000383514	7	74.5489
Lassosum2_EUR	SAS	3	1	2	0.025612	0.000394226	5	22.8872
SSL_EUR	SAS	3	1	2	0.0253045	0.00137988	6	24.3805
PRS-CSx	SAS	3	1	2	0.0284634	0.00106805	3	10.5767
CT-SLEB	SAS	3	1	2	0.0295257	0.000779168	2	6.59813
PROSPER	SAS	3	1	2	0.0276821	0.00123197	4	13.6975
pSSL	SAS	3	1	2	0.0314739	0.000695095	1	0
C+T	SAS	3	1	3	0.00218139	0.000255781	10	788.234
Lassosum2	SAS	3	1	3	0.00395894	0.000410744	8	389.421
SSL	SAS	3	1	3	0.00269637	0.000161565	9	618.592
C+T_EUR	SAS	3	1	3	0.0117495	0.00159088	7	64.9082
Lassosum2_EUR	SAS	3	1	3	0.0159431	0.000969489	5	21.5316
SSL_EUR	SAS	3	1	3	0.0139468	0.00103732	6	38.9274
PRS-CSx	SAS	3	1	3	0.0184801	0.000825798	3	4.84705
CT-SLEB	SAS	3	1	3	0.0191128	0.000833995	2	1.37661
PROSPER	SAS	3	1	3	0.0165179	0.000201094	4	17.3027
pSSL	SAS	3	1	3	0.0193759	0.000427677	1	0
C+T	SAS	3	3	1	0.112259	0.00368836	7	66.4555
Lassosum2	SAS	3	3	1	0.179556	0.000767853	3	4.0688
SSL	SAS	3	3	1	0.16375	0.00360734	6	14.1144
C+T_EUR	SAS	3	3	1	0.0734083	0.00319864	10	154.551
Lassosum2_EUR	SAS	3	3	1	0.0915667	0.00166002	8	104.072
SSL_EUR	SAS	3	3	1	0.0883422	0.00263123	9	111.52
PRS-CSx	SAS	3	3	1	0.167056	0.0063487	5	11.8557
CT-SLEB	SAS	3	3	1	0.182182	0.00243808	2	2.56873
PROSPER	SAS	3	3	1	0.174515	0.0015407	4	7.07496
pSSL	SAS	3	3	1	0.186862	0.00441292	1	0
C+T	SAS	3	3	2	0.0270931	0.00234081	7	98.4881
Lassosum2	SAS	3	3	2	0.0396151	0.0035267	5	35.7475
SSL	SAS	3	3	2	0.038429	0.00137789	6	39.9374
C+T_EUR	SAS	3	3	2	0.0180316	0.000383514	10	198.235
Lassosum2_EUR	SAS	3	3	2	0.025612	0.000394226	8	109.966
SSL_EUR	SAS	3	3	2	0.0253045	0.00137988	9	112.517
PRS-CSx	SAS	3	3	2	0.0507859	0.00147016	4	5.88866
CT-SLEB	SAS	3	3	2	0.0528947	0.00171142	2	1.66704
PROSPER	SAS	3	3	2	0.0523156	0.00147688	3	2.79248
pSSL	SAS	3	3	2	0.0537765	0.000429795	1	0
C+T	SAS	3	3	3	0.022861	0.00167182	7	106.21
Lassosum2	SAS	3	3	3	0.0363194	0.00071502	5	29.7974
SSL	SAS	3	3	3	0.0351146	0.00162023	6	34.2506
C+T_EUR	SAS	3	3	3	0.0117495	0.00159088	10	301.223
Lassosum2_EUR	SAS	3	3	3	0.0159431	0.000969489	8	195.687
SSL_EUR	SAS	3	3	3	0.0139468	0.00103732	9	238.011
PRS-CSx	SAS	3	3	3	0.0432116	0.000948016	4	9.09485
CT-SLEB	SAS	3	3	3	0.0462423	0.00172243	2	1.94491
PROSPER	SAS	3	3	3	0.0452106	0.000429838	3	4.27111
pSSL	SAS	3	3	3	0.0471416	0.000222493	1	0
C+T	AMR	1	1	1	0.0146317	0.000820562	10	233.092
Lassosum2	AMR	1	1	1	0.0212869	0.00136448	8	128.954
SSL	AMR	1	1	1	0.0180654	0.00153772	9	169.782
C+T_EUR	AMR	1	1	1	0.0233618	0.00165779	7	108.619
Lassosum2_EUR	AMR	1	1	1	0.0389993	0.00101012	5	24.9693
SSL_EUR	AMR	1	1	1	0.0377596	0.00272312	6	29.0721
PRS-CSx	AMR	1	1	1	0.0501081	0.00177715	1	-2.73598
CT-SLEB	AMR	1	1	1	0.0473323	0.00196817	4	2.96807
PROSPER	AMR	1	1	1	0.0494788	0.00169464	2	-1.49888
pSSL	AMR	1	1	1	0.0487372	0.00233641	3	0
C+T	AMR	1	1	2	0.002831	0.000175468	10	356.708
Lassosum2	AMR	1	1	2	0.00466268	0.000474564	8	177.296
SSL	AMR	1	1	2	0.00362247	0.000337115	9	256.923
C+T_EUR	AMR	1	1	2	0.00654843	0.000660308	7	97.4432
Lassosum2_EUR	AMR	1	1	2	0.0110932	0.00137939	5	16.5523
SSL_EUR	AMR	1	1	2	0.0089525	0.00171038	6	44.4225
PRS-CSx	AMR	1	1	2	0.0151562	0.0012668	1	-14.6919
CT-SLEB	AMR	1	1	2	0.0135027	0.00177573	3	-4.24543
PROSPER	AMR	1	1	2	0.0135961	0.00130091	2	-4.90363
pSSL	AMR	1	1	2	0.0129294	0.00127677	4	0
C+T	AMR	1	1	3	0.0042335	0.0013856	10	199.212
Lassosum2	AMR	1	1	3	0.00660132	0.00161505	7	91.8875
SSL	AMR	1	1	3	0.00564468	0.00165219	8	124.408
C+T_EUR	AMR	1	1	3	0.00486068	0.000867508	9	160.604
Lassosum2_EUR	AMR	1	1	3	0.00809943	0.00117238	5	56.3952
SSL_EUR	AMR	1	1	3	0.00747686	0.00137698	6	69.4176
PRS-CSx	AMR	1	1	3	0.0131757	0.00248605	1	-3.85998
CT-SLEB	AMR	1	1	3	0.0121249	0.00254356	4	4.4718
PROSPER	AMR	1	1	3	0.0124282	0.003354	3	1.92254
pSSL	AMR	1	1	3	0.0126671	0.00324896	2	0
C+T	AMR	1	3	1	0.0555677	0.00111274	7	56.4369
Lassosum2	AMR	1	3	1	0.073072	0.00153493	5	18.9627
SSL	AMR	1	3	1	0.0677366	0.000918147	6	28.333
C+T_EUR	AMR	1	3	1	0.0233618	0.00165779	10	272.096
Lassosum2_EUR	AMR	1	3	1	0.0389993	0.00101012	8	122.897
SSL_EUR	AMR	1	3	1	0.0377596	0.00272312	9	130.215
PRS-CSx	AMR	1	3	1	0.0899459	0.00378422	1	-3.35477
CT-SLEB	AMR	1	3	1	0.083526	0.000818797	4	4.07344
PROSPER	AMR	1	3	1	0.0865491	0.000935697	3	0.438265
pSSL	AMR	1	3	1	0.0869284	0.001094	2	0
C+T	AMR	1	3	2	0.0178397	0.000660811	7	59.8872
Lassosum2	AMR	1	3	2	0.0253529	0.000557745	5	12.5056
SSL	AMR	1	3	2	0.0225036	0.00126845	6	26.7504
C+T_EUR	AMR	1	3	2	0.00654843	0.000660308	10	335.577
Lassosum2_EUR	AMR	1	3	2	0.0110932	0.00137939	8	157.125
SSL_EUR	AMR	1	3	2	0.0089525	0.00171038	9	218.608
PRS-CSx	AMR	1	3	2	0.0300347	0.00184835	1	-5.03165
CT-SLEB	AMR	1	3	2	0.0272137	0.000655572	4	4.81275
PROSPER	AMR	1	3	2	0.0291205	0.00123898	2	-2.05038
pSSL	AMR	1	3	2	0.0285234	0.00223061	3	0
C+T	AMR	1	3	3	0.0189416	0.000343826	7	46.3172
Lassosum2	AMR	1	3	3	0.0255855	0.000499152	5	8.32209
SSL	AMR	1	3	3	0.0220248	0.000893773	6	25.8345
C+T_EUR	AMR	1	3	3	0.00486068	0.000867508	10	470.182
Lassosum2_EUR	AMR	1	3	3	0.00809943	0.00117238	8	242.181
SSL_EUR	AMR	1	3	3	0.00747686	0.00137698	9	270.674
PRS-CSx	AMR	1	3	3	0.0289839	0.00108921	1	-4.37888
CT-SLEB	AMR	1	3	3	0.0275476	0.00114435	4	0.606598
PROSPER	AMR	1	3	3	0.0280067	0.000512464	2	-1.0423
pSSL	AMR	1	3	3	0.0277147	0.00185247	3	0
C+T	AMR	2	1	1	0.0119498	0.00147768	10	530.997
Lassosum2	AMR	2	1	1	0.0181827	0.00193463	8	314.698
SSL	AMR	2	1	1	0.0158188	0.00232636	9	376.667
C+T_EUR	AMR	2	1	1	0.0482414	0.00118501	7	56.3039
Lassosum2_EUR	AMR	2	1	1	0.0663443	0.000336791	6	13.6542
SSL_EUR	AMR	2	1	1	0.0674261	0.0013224	5	11.8308
PRS-CSx	AMR	2	1	1	0.0777034	0.00236116	2	-2.9603
CT-SLEB	AMR	2	1	1	0.080092	0.00148791	1	-5.85433
PROSPER	AMR	2	1	1	0.0697379	0.00102317	4	8.12357
pSSL	AMR	2	1	1	0.0754031	0.00127167	3	0
C+T	AMR	2	1	2	0.00338608	0.000383512	10	555.113
Lassosum2	AMR	2	1	2	0.00525324	0.000453081	8	322.266
SSL	AMR	2	1	2	0.00409604	0.000709192	9	441.563
C+T_EUR	AMR	2	1	2	0.0117978	0.00129421	7	88.023
Lassosum2_EUR	AMR	2	1	2	0.0178099	0.000536454	6	24.5526
SSL_EUR	AMR	2	1	2	0.0190039	0.00123301	5	16.7266
PRS-CSx	AMR	2	1	2	0.0240325	0.0010614	1	-7.69737
CT-SLEB	AMR	2	1	2	0.022855	0.000181332	2	-2.94188
PROSPER	AMR	2	1	2	0.0215011	0.00204237	4	3.17009
pSSL	AMR	2	1	2	0.0221827	0.00224446	3	0
C+T	AMR	2	1	3	0.00455915	0.000261658	10	342.294
Lassosum2	AMR	2	1	3	0.00714778	0.000394826	8	182.113
SSL	AMR	2	1	3	0.00645	0.000186121	9	212.633
C+T_EUR	AMR	2	1	3	0.00848838	0.000612253	7	137.558
Lassosum2_EUR	AMR	2	1	3	0.0118932	0.00172961	6	69.5495
SSL_EUR	AMR	2	1	3	0.0120174	0.000563946	5	67.7976
PRS-CSx	AMR	2	1	3	0.0190604	0.00133832	3	5.79453
CT-SLEB	AMR	2	1	3	0.0192305	0.000838434	2	4.85892
PROSPER	AMR	2	1	3	0.018215	0.00153354	4	10.7047
pSSL	AMR	2	1	3	0.0201648	0.000697242	1	0
C+T	AMR	2	3	1	0.0617084	0.00199735	9	92.7049
Lassosum2	AMR	2	3	1	0.0975149	0.00278222	5	21.9456
SSL	AMR	2	3	1	0.0873001	0.000607178	6	36.2142
C+T_EUR	AMR	2	3	1	0.0482414	0.00118501	10	146.5
Lassosum2_EUR	AMR	2	3	1	0.0663443	0.000336791	8	79.2394
SSL_EUR	AMR	2	3	1	0.0674261	0.0013224	7	76.3637
PRS-CSx	AMR	2	3	1	0.120166	0.00269871	2	-1.04129
CT-SLEB	AMR	2	3	1	0.120201	0.000962668	1	-1.07007
PROSPER	AMR	2	3	1	0.119281	0.00189723	3	-0.306505
pSSL	AMR	2	3	1	0.118915	0.00158545	4	0
C+T	AMR	2	3	2	0.0184324	6.23687e-05	8	131.987
Lassosum2	AMR	2	3	2	0.0280556	0.000559876	5	52.4144
SSL	AMR	2	3	2	0.0260726	0.000919223	6	64.0061
C+T_EUR	AMR	2	3	2	0.0117978	0.00129421	10	262.445
Lassosum2_EUR	AMR	2	3	2	0.0178099	0.000536454	9	140.096
SSL_EUR	AMR	2	3	2	0.0190039	0.00123301	7	125.01
PRS-CSx	AMR	2	3	2	0.0436145	0.00137939	1	-1.95748
CT-SLEB	AMR	2	3	2	0.0429594	0.000266543	2	-0.462422
PROSPER	AMR	2	3	2	0.0401777	0.0021511	4	6.42894
pSSL	AMR	2	3	2	0.0427607	0.000978877	3	0
C+T	AMR	2	3	3	0.0219112	0.0018407	7	96.7896
Lassosum2	AMR	2	3	3	0.0340583	0.00159503	5	26.6035
SSL	AMR	2	3	3	0.0327164	0.00168114	6	31.7963
C+T_EUR	AMR	2	3	3	0.00848838	0.000612253	10	407.977
Lassosum2_EUR	AMR	2	3	3	0.0118932	0.00172961	9	262.552
SSL_EUR	AMR	2	3	3	0.0120174	0.000563946	8	258.806
PRS-CSx	AMR	2	3	3	0.0430545	0.00148817	2	0.149744
CT-SLEB	AMR	2	3	3	0.0396725	0.00102482	4	8.68741
PROSPER	AMR	2	3	3	0.0397928	0.00134047	3	8.35897
pSSL	AMR	2	3	3	0.043119	0.00173337	1	0
C+T	AMR	3	1	1	0.0136934	0.000178802	10	650.398
Lassosum2	AMR	3	1	1	0.0254074	0.00122505	8	304.429
SSL	AMR	3	1	1	0.0244968	0.00130076	9	319.463
C+T_EUR	AMR	3	1	1	0.0628058	0.00252944	7	63.6077
Lassosum2_EUR	AMR	3	1	1	0.0889091	0.00130091	5	15.5732
SSL_EUR	AMR	3	1	1	0.0846116	0.000469197	6	21.4432
PRS-CSx	AMR	3	1	1	0.096358	0.00110358	3	6.63884
CT-SLEB	AMR	3	1	1	0.103947	0.00203714	1	-1.14664
PROSPER	AMR	3	1	1	0.0913383	0.00118371	4	12.4994
pSSL	AMR	3	1	1	0.102755	0.00133689	2	0
C+T	AMR	3	1	2	0.00474584	0.000604361	10	654.2
Lassosum2	AMR	3	1	2	0.00839755	0.0011864	8	326.234
SSL	AMR	3	1	2	0.00739537	0.00137348	9	383.995
C+T_EUR	AMR	3	1	2	0.0182827	0.00143028	7	95.7765
Lassosum2_EUR	AMR	3	1	2	0.0258974	0.00242482	6	38.2113
SSL_EUR	AMR	3	1	2	0.0274223	0.00291173	5	30.5257
PRS-CSx	AMR	3	1	2	0.0302207	0.00210923	3	18.4393
CT-SLEB	AMR	3	1	2	0.0361666	0.00157086	1	-1.03267
PROSPER	AMR	3	1	2	0.0290363	0.00303293	4	23.2704
pSSL	AMR	3	1	2	0.0357932	0.00189608	2	0
C+T	AMR	3	1	3	0.00494498	0.000789971	10	357.174
Lassosum2	AMR	3	1	3	0.00876657	0.00176881	8	157.879
SSL	AMR	3	1	3	0.00691822	0.00161579	9	226.777
C+T_EUR	AMR	3	1	3	0.0102421	0.000832126	7	120.729
Lassosum2_EUR	AMR	3	1	3	0.0145341	0.00171312	5	55.5454
SSL_EUR	AMR	3	1	3	0.0123947	0.00161139	6	82.3937
PRS-CSx	AMR	3	1	3	0.0210506	0.00222854	3	7.39419
CT-SLEB	AMR	3	1	3	0.0226506	0.00190542	1	-0.191789
PROSPER	AMR	3	1	3	0.0198542	0.00341534	4	13.866
pSSL	AMR	3	1	3	0.0226072	0.00220256	2	0
C+T	AMR	3	3	1	0.086302	0.00302623	8	81.266
Lassosum2	AMR	3	3	1	0.141161	0.00585944	5	10.8211
SSL	AMR	3	3	1	0.126692	0.00542789	6	23.4773
C+T_EUR	AMR	3	3	1	0.0628058	0.00252944	10	149.079
Lassosum2_EUR	AMR	3	3	1	0.0889091	0.00130091	7	75.9508
SSL_EUR	AMR	3	3	1	0.0846116	0.000469197	9	84.8875
PRS-CSx	AMR	3	3	1	0.155377	0.00260073	2	0.681398
CT-SLEB	AMR	3	3	1	0.1543	0.000878508	3	1.38463
PROSPER	AMR	3	3	1	0.15157	0.00304193	4	3.21078
pSSL	AMR	3	3	1	0.156436	0.00400907	1	0
C+T	AMR	3	3	2	0.0281434	0.00131373	7	122.992
Lassosum2	AMR	3	3	2	0.0494655	0.00349332	5	26.8714
SSL	AMR	3	3	2	0.0438494	0.00279141	6	43.1206
C+T_EUR	AMR	3	3	2	0.0182827	0.00143028	10	243.263
Lassosum2_EUR	AMR	3	3	2	0.0258974	0.00242482	9	142.331
SSL_EUR	AMR	3	3	2	0.0274223	0.00291173	8	128.856
PRS-CSx	AMR	3	3	2	0.0588585	0.00254198	4	6.62438
CT-SLEB	AMR	3	3	2	0.0593579	0.00228265	3	5.72745
PROSPER	AMR	3	3	2	0.0593611	0.00448256	2	5.7217
pSSL	AMR	3	3	2	0.0627576	0.00366138	1	0
C+T	AMR	3	3	3	0.027055	0.00134192	7	91.1197
Lassosum2	AMR	3	3	3	0.0460951	0.00100898	5	12.1755
SSL	AMR	3	3	3	0.0424434	0.00141684	6	21.8268
C+T_EUR	AMR	3	3	3	0.0102421	0.000832126	10	404.854
Lassosum2_EUR	AMR	3	3	3	0.0145341	0.00171312	8	255.765
SSL_EUR	AMR	3	3	3	0.0123947	0.00161139	9	317.173
PRS-CSx	AMR	3	3	3	0.0508916	0.00188429	3	1.60302
CT-SLEB	AMR	3	3	3	0.0543993	0.00250741	1	-4.94839
PROSPER	AMR	3	3	3	0.0508715	0.00129952	4	1.64307
pSSL	AMR	3	3	3	0.0517074	0.00191898	2	0

## Sheet: Supplemental Data 3
Type	Trait	Methods	Mean	Se	Rank	Improvement_pentage ((SSL Mean – Method Mean) / Method Mean × 100%)
UKB	Height	C+T	0.368223	0.00155223	7	24.1332
UKB	Height	uaPGS	0.218386	0.00197086	10	109.303
UKB	Height	LDpred2_inf	0.346417	0.00138361	8	31.9471
UKB	Height	LDpred2_auto	0.311241	0.00185609	9	46.8593
UKB	Height	PRS-CS	0.458344	0.00184096	1	-0.274328
UKB	Height	PRS-CSauto	0.43162	0.00178873	3	5.90046
UKB	Height	Lassosum	0.40844	0.00166501	4	11.9104
UKB	Height	Lassosum2	0.388425	0.00137678	6	17.677
UKB	Height	Allsum	0.407825	0.00158933	5	12.0792
UKB	Height	SSL	0.457087	0.00178	2	0
UKB	Weight	C+T	0.281622	0.00168724	7	24.4495
UKB	Weight	uaPGS	0.145665	0.00112881	10	140.604
UKB	Weight	LDpred2_inf	0.289649	0.00157053	5	21.0007
UKB	Weight	LDpred2_auto	0.286783	0.00156155	6	22.2101
UKB	Weight	PRS-CS	0.353694	0.00143753	1	-0.909439
UKB	Weight	PRS-CSauto	0.224796	0.00156051	9	55.9089
UKB	Weight	Lassosum	0.320074	0.00158894	3	9.49876
UKB	Weight	Lassosum2	0.29799	0.00179495	4	17.6138
UKB	Weight	Allsum	0.280262	0.00175259	8	25.0535
UKB	Weight	SSL	0.350477	0.00156089	2	0
UKB	Waist	C+T	0.2674	0.000910246	6	25.9658
UKB	Waist	uaPGS	0.16074	0.000865841	10	109.552
UKB	Waist	LDpred2_inf	0.263	0.00114	7	28.0734
UKB	Waist	LDpred2_auto	0.27	0.0012	5	24.7529
UKB	Waist	PRS-CS	0.331697	0.00123961	2	1.54853
UKB	Waist	PRS-CSauto	0.206063	0.00108855	9	63.461
UKB	Waist	Lassosum	0.309478	0.00101582	3	8.83889
UKB	Waist	Lassosum2	0.273554	0.00111423	4	23.1321
UKB	Waist	Allsum	0.254214	0.000802877	8	32.4999
UKB	Waist	SSL	0.336833	0.00135375	1	0
UKB	BMI	C+T	0.277111	0.00177373	8	30.4233
UKB	BMI	uaPGS	0.147493	0.00167866	10	145.04
UKB	BMI	LDpred2_inf	0.290714	0.00169216	6	24.3204
UKB	BMI	LDpred2_auto	0.289232	0.00169845	7	24.9574
UKB	BMI	PRS-CS	0.362292	0.00191056	1	-0.241473
UKB	BMI	PRS-CSauto	0.233009	0.00184307	9	55.1086
UKB	BMI	Lassosum	0.323757	0.00218481	3	11.6321
UKB	BMI	Lassosum2	0.291339	0.00171412	5	24.054
UKB	BMI	Allsum	0.306941	0.00135537	4	17.748
UKB	BMI	SSL	0.361417	0.001902	2	0
UKB	SBP	C+T	0.0753339	0.00115042	8	44.4455
UKB	SBP	uaPGS	0.037285	0.0010138	10	191.85
UKB	SBP	LDpred2_inf	0.0783497	0.00122372	6	38.8856
UKB	SBP	LDpred2_auto	0.0776606	0.00123156	7	40.118
UKB	SBP	PRS-CS	0.104366	0.00125383	2	4.26451
UKB	SBP	PRS-CSauto	0.0596567	0.0012579	9	82.4044
UKB	SBP	Lassosum	0.0874709	0.00141959	4	24.4031
UKB	SBP	Lassosum2	0.0824903	0.00105528	5	31.9142
UKB	SBP	Allsum	0.0892875	0.00122238	3	21.8721
UKB	SBP	SSL	0.108816	0.00135635	1	0
UKB	DBP	C+T	0.0783862	0.00100111	8	51.7143
UKB	DBP	uaPGS	0.0284254	0.00060767	10	318.37
UKB	DBP	LDpred2_inf	0.0894528	0.000984514	6	32.9451
UKB	DBP	LDpred2_auto	0.0887199	0.000972056	7	34.0434
UKB	DBP	PRS-CS	0.114997	0.00105727	2	3.41368
UKB	DBP	PRS-CSauto	0.058816	0.000782327	9	102.195
UKB	DBP	Lassosum	0.0929945	0.000989798	5	27.8819
UKB	DBP	Lassosum2	0.0950727	0.00106303	4	25.0865
UKB	DBP	Allsum	0.101777	0.000841755	3	16.8471
UKB	DBP	SSL	0.118923	0.00128163	1	0
UKB	PP	C+T	0.168505	0.00164298	8	43.3058
UKB	PP	uaPGS	0.078265	0.00146515	10	208.537
UKB	PP	LDpred2_inf	0.178902	0.00172465	6	34.977
UKB	PP	LDpred2_auto	0.176344	0.00172823	7	36.9352
UKB	PP	PRS-CS	0.236928	0.00167093	2	1.91987
UKB	PP	PRS-CSauto	0.135042	0.00148721	9	78.8158
UKB	PP	Lassosum	0.198469	0.00143365	4	21.6695
UKB	PP	Lassosum2	0.189431	0.00184091	5	27.475
UKB	PP	Allsum	0.203269	0.00169582	3	18.7968
UKB	PP	SSL	0.241477	0.00170463	1	0
UKB	HDL	C+T	0.20896	0.00217582	8	38.0315
UKB	HDL	uaPGS	0.121581	0.0013559	10	137.234
UKB	HDL	LDpred2_inf	0.232457	0.00139547	4	24.0792
UKB	HDL	LDpred2_auto	0.23338	0.00144252	3	23.5883
UKB	HDL	PRS-CS	0.269901	0.00199766	2	6.86529
UKB	HDL	PRS-CSauto	0.198386	0.00148272	9	45.3886
UKB	HDL	Lassosum	0.216305	0.00165656	7	33.3444
UKB	HDL	Lassosum2	0.228267	0.00183585	5	26.3567
UKB	HDL	Allsum	0.222272	0.00148358	6	29.765
UKB	HDL	SSL	0.288431	0.00158339	1	0
UKB	LDL	C+T	0.126681	0.00106256	4	39.113
UKB	LDL	uaPGS	0.0642102	0.00109414	10	174.457
UKB	LDL	LDpred2_inf	0.122051	0.00129955	5	44.3894
UKB	LDL	LDpred2_auto	0.121365	0.00131347	6	45.2063
UKB	LDL	PRS-CS	0.157243	0.00149547	2	12.0741
UKB	LDL	PRS-CSauto	0.110842	0.00122794	9	58.9917
UKB	LDL	Lassosum	0.112161	0.00110731	8	57.1223
UKB	LDL	Lassosum2	0.121326	0.00115417	7	45.2521
UKB	LDL	Allsum	0.127104	0.00112223	3	38.6497
UKB	LDL	SSL	0.176229	0.00147597	1	0
UKB	TC	C+T	0.124642	0.00141712	7	43.1921
UKB	TC	uaPGS	0.0637035	0.000794689	10	180.169
UKB	TC	LDpred2_inf	0.128306	0.00132921	5	39.1027
UKB	TC	LDpred2_auto	0.126652	0.00130053	6	40.9192
UKB	TC	PRS-CS	0.168154	0.00126265	2	6.13916
UKB	TC	PRS-CSauto	0.114982	0.00127655	8	55.2221
UKB	TC	Lassosum	0.106537	0.00141546	9	67.5258
UKB	TC	Lassosum2	0.13225	0.00137088	3	34.955
UKB	TC	Allsum	0.131339	0.00142425	4	35.8911
UKB	TC	SSL	0.178478	0.0016712	1	0
UKB	TG	C+T	0.149166	0.00189459	7	36.301
UKB	TG	uaPGS	0.0828341	0.00122962	10	145.448
UKB	TG	LDpred2_inf	0.162316	0.00203045	3	25.2589
UKB	TG	LDpred2_auto	0.16229	0.00203809	4	25.2787
UKB	TG	PRS-CS	0.194364	0.00186319	2	4.60508
UKB	TG	PRS-CSauto	0.132711	0.00183804	9	53.2005
UKB	TG	Lassosum	0.150766	0.00191629	6	34.8543
UKB	TG	Lassosum2	0.158621	0.00178242	5	28.1767
UKB	TG	Allsum	0.147549	0.00217319	8	37.7944
UKB	TG	SSL	0.203315	0.00158343	1	0
UKB	FBG	C+T	0.125636	0.00161603	5	33.3338
UKB	FBG	uaPGS	0.0573501	0.00117837	10	192.092
UKB	FBG	LDpred2_inf	0.0965069	0.00152678	7	73.5787
UKB	FBG	LDpred2_auto	0.0916165	0.00151755	8	82.8442
UKB	FBG	PRS-CS	0.161941	0.00159387	2	3.44251
UKB	FBG	PRS-CSauto	0.0593141	0.00131553	9	182.421
UKB	FBG	Lassosum	0.140807	0.0016289	3	18.9682
UKB	FBG	Lassosum2	0.131189	0.00154454	4	27.6896
UKB	FBG	Allsum	0.114903	0.00147702	6	45.7884
UKB	FBG	SSL	0.167515	0.00155669	1	0
UKB	RBC	C+T	0.235094	0.00138315	8	33.291
UKB	RBC	uaPGS	0.107922	0.000850218	10	190.356
UKB	RBC	LDpred2_inf	0.257157	0.00164728	6	21.8553
UKB	RBC	LDpred2_auto	0.258079	0.00164099	5	21.4195
UKB	RBC	PRS-CS	0.310884	0.00180102	2	0.796074
UKB	RBC	PRS-CSauto	0.199395	0.00147993	9	57.1551
UKB	RBC	Lassosum	0.258517	0.00168411	4	21.2142
UKB	RBC	Lassosum2	0.258565	0.0016405	3	21.1913
UKB	RBC	Allsum	0.240802	0.00147581	7	30.1311
UKB	RBC	SSL	0.313359	0.00170723	1	0
UKB	MCV	C+T	0.0806615	0.00172678	8	59.1045
UKB	MCV	uaPGS	0.0395735	0.000983853	10	224.298
UKB	MCV	LDpred2_inf	0.0996172	0.00170653	5	28.8292
UKB	MCV	LDpred2_auto	0.0995691	0.0017172	6	28.8915
UKB	MCV	PRS-CS	0.107273	0.00189	3	19.6346
UKB	MCV	PRS-CSauto	0.0699614	0.00148896	9	83.4384
UKB	MCV	Lassosum	0.091762	0.00167895	7	39.8576
UKB	MCV	Lassosum2	0.102115	0.0016226	4	25.6785
UKB	MCV	Allsum	0.118064	0.001556	2	8.70077
UKB	MCV	SSL	0.128336	0.00198599	1	0
UKB	MCH	C+T	0.187101	0.00303918	8	44.0963
UKB	MCH	uaPGS	0.0922517	0.00142016	10	192.25
UKB	MCH	LDpred2_inf	0.220501	0.00341172	4	22.2697
UKB	MCH	LDpred2_auto	0.221019	0.00341876	3	21.9833
UKB	MCH	PRS-CS	0.249168	0.00402071	2	8.20247
UKB	MCH	PRS-CSauto	0.153577	0.00211285	9	75.5513
UKB	MCH	Lassosum	0.208948	0.00326304	7	29.0299
UKB	MCH	Lassosum2	0.213534	0.00383614	6	26.259
UKB	MCH	Allsum	0.21641	0.003264	5	24.5811
UKB	MCH	SSL	0.269606	0.0042047	1	0
UKB	MCHC	C+T	0.0784829	0.00249237	5	54.4622
UKB	MCHC	uaPGS	0.028828	0.000952381	10	320.516
UKB	MCHC	LDpred2_inf	0.0775293	0.00254628	6	56.3622
UKB	MCHC	LDpred2_auto	0.0771074	0.00252005	7	57.2177
UKB	MCHC	PRS-CS	0.111699	0.00357904	2	8.52937
UKB	MCHC	PRS-CSauto	0.040615	0.00121833	9	198.477
UKB	MCHC	Lassosum	0.0867258	0.00260235	4	39.7813
UKB	MCHC	Lassosum2	0.0932008	0.00318001	3	30.0702
UKB	MCHC	Allsum	0.0760082	0.00284264	8	59.4912
UKB	MCHC	SSL	0.121226	0.00352712	1	0
UKB	HGB	C+T	0.171645	0.00140782	8	63.3241
UKB	HGB	uaPGS	0.0564736	0.00075438	10	396.406
UKB	HGB	LDpred2_inf	0.21213	0.002236	5	32.1542
UKB	HGB	LDpred2_auto	0.212803	0.00222846	4	31.7363
UKB	HGB	PRS-CS	0.253306	0.00169365	2	10.6719
UKB	HGB	PRS-CSauto	0.117172	0.000947049	9	139.254
UKB	HGB	Lassosum	0.19169	0.00154452	7	46.246
UKB	HGB	Lassosum2	0.222907	0.00223927	3	25.7646
UKB	HGB	Allsum	0.203871	0.00190962	6	37.5075
UKB	HGB	SSL	0.280338	0.00211313	1	0
UKB	HCT	C+T	0.178242	0.0011346	8	50.7997
UKB	HCT	uaPGS	0.0616865	0.00053824	10	335.733
UKB	HCT	LDpred2_inf	0.205848	0.00104497	5	30.5761
UKB	HCT	LDpred2_auto	0.205855	0.0010562	4	30.5719
UKB	HCT	PRS-CS	0.254488	0.00136021	2	5.61943
UKB	HCT	PRS-CSauto	0.128266	0.000548291	9	109.555
UKB	HCT	Lassosum	0.20235	0.000867493	6	32.8338
UKB	HCT	Lassosum2	0.216766	0.00165478	3	23.9992
UKB	HCT	Allsum	0.200374	0.00100634	7	34.1434
UKB	HCT	SSL	0.268789	0.000999326	1	0
UKB	WBC	C+T	0.0955201	0.005787	7	100.745
UKB	WBC	uaPGS	0.0289434	0.00186452	10	562.506
UKB	WBC	LDpred2_inf	0.147953	0.00801911	5	29.6031
UKB	WBC	LDpred2_auto	0.149316	0.00808346	4	28.4199
UKB	WBC	PRS-CS	0.163364	0.00915018	2	17.3772
UKB	WBC	PRS-CSauto	0.0689387	0.00420659	9	178.148
UKB	WBC	Lassosum	0.0941574	0.00574469	8	103.65
UKB	WBC	Lassosum2	0.154038	0.00826263	3	24.4836
UKB	WBC	Allsum	0.144004	0.00817702	6	33.157
UKB	WBC	SSL	0.191752	0.0102823	1	0
UKB	LYM	C+T	0.0476769	0.00684799	7	82.7846
UKB	LYM	uaPGS	0.0141111	0.00211883	10	517.572
UKB	LYM	LDpred2_inf	0.0678575	0.0100488	5	28.4252
UKB	LYM	LDpred2_auto	0.0683504	0.0101167	4	27.4989
UKB	LYM	PRS-CS	0.0754725	0.010907	2	15.4674
UKB	LYM	PRS-CSauto	0.0337253	0.00505055	9	158.4
UKB	LYM	Lassosum	0.0373957	0.00566163	8	133.038
UKB	LYM	Lassosum2	0.0711468	0.0102396	3	22.4877
UKB	LYM	Allsum	0.0640502	0.00960407	6	36.059
UKB	LYM	SSL	0.0871461	0.0126644	1	0
UKB	MONO	C+T	0.116267	0.0054394	8	59.0288
UKB	MONO	uaPGS	0.0352931	0.00175864	10	423.893
UKB	MONO	LDpred2_inf	0.15068	0.00709561	5	22.7092
UKB	MONO	LDpred2_auto	0.151109	0.00712188	4	22.3607
UKB	MONO	PRS-CS	0.172732	0.00773568	2	7.04301
UKB	MONO	PRS-CSauto	0.0996612	0.00470956	9	85.5264
UKB	MONO	Lassosum	0.13157	0.00596185	7	40.5317
UKB	MONO	Lassosum2	0.154517	0.00662677	3	19.6621
UKB	MONO	Allsum	0.145474	0.00649051	6	27.1004
UKB	MONO	SSL	0.184898	0.00818374	1	0
UKB	NEUT	C+T	0.156669	0.0018021	8	61.7051
UKB	NEUT	uaPGS	0.0482569	0.00105168	10	424.984
UKB	NEUT	LDpred2_inf	0.191529	0.00175266	5	32.2732
UKB	NEUT	LDpred2_auto	0.192208	0.00177468	4	31.8057
UKB	NEUT	PRS-CS	0.23652	0.00182486	2	7.11197
UKB	NEUT	PRS-CSauto	0.104377	0.00160344	9	142.717
UKB	NEUT	Lassosum	0.166894	0.00183095	7	51.7979
UKB	NEUT	Lassosum2	0.206599	0.00205654	3	22.6244
UKB	NEUT	Allsum	0.182496	0.00196668	6	38.8199
UKB	NEUT	SSL	0.253341	0.00200776	1	0
UKB	EOS	C+T	0.153893	0.0039802	8	57.755
UKB	EOS	uaPGS	0.0475473	0.00145111	10	410.594
UKB	EOS	LDpred2_inf	0.188088	0.00406207	5	29.0741
UKB	EOS	LDpred2_auto	0.189571	0.00409147	4	28.0646
UKB	EOS	PRS-CS	0.230071	0.00481427	2	5.52104
UKB	EOS	PRS-CSauto	0.113796	0.00296672	9	113.341
UKB	EOS	Lassosum	0.160307	0.00382464	7	51.4431
UKB	EOS	Lassosum2	0.202029	0.00430024	3	20.1677
UKB	EOS	Allsum	0.180564	0.00337683	6	34.4526
UKB	EOS	SSL	0.242773	0.00540558	1	0
UKB	BASO	C+T	0.0593378	0.00181019	5	54.5462
UKB	BASO	uaPGS	0.0195494	0.000888202	10	369.09
UKB	BASO	LDpred2_inf	0.0545176	0.00145934	6	68.2104
UKB	BASO	LDpred2_auto	0.053514	0.00141795	8	71.3652
UKB	BASO	PRS-CS	0.0872487	0.00271389	2	5.10677
UKB	BASO	PRS-CSauto	0.0353049	0.00095547	9	159.749
UKB	BASO	Lassosum	0.0611895	0.00161735	4	49.8693
UKB	BASO	Lassosum2	0.0714141	0.00221584	3	28.412
UKB	BASO	Allsum	0.0538463	0.0014149	7	70.3074
UKB	BASO	SSL	0.0917043	0.00293972	1	0
UKB	PLT	C+T	0.262953	0.00224624	8	30.6042
UKB	PLT	uaPGS	0.13884	0.00162823	10	147.354
UKB	PLT	LDpred2_inf	0.282575	0.00272883	7	21.5348
UKB	PLT	LDpred2_auto	0.28293	0.00272748	6	21.3825
UKB	PLT	PRS-CS	0.340212	0.00309451	2	0.945213
UKB	PLT	PRS-CSauto	0.255039	0.00214696	9	34.6566
UKB	PLT	Lassosum	0.301159	0.00271021	3	14.0354
UKB	PLT	Lassosum2	0.285655	0.00217527	5	20.2245
UKB	PLT	Allsum	0.289583	0.00254501	4	18.5938
UKB	PLT	SSL	0.343427	0.0029408	1	0
UKB	AST	C+T	0.100888	0.00372491	8	65.9216
UKB	AST	uaPGS	0.0256387	0.00104029	10	552.903
UKB	AST	LDpred2_inf	0.10733	0.00364397	6	55.9634
UKB	AST	LDpred2_auto	0.105227	0.00357969	7	59.0804
UKB	AST	PRS-CS	0.152054	0.00582431	2	10.0896
UKB	AST	PRS-CSauto	0.0510516	0.00199706	9	227.895
UKB	AST	Lassosum	0.10969	0.00414306	5	52.6075
UKB	AST	Lassosum2	0.131744	0.00428217	3	27.061
UKB	AST	Allsum	0.116693	0.00392723	4	43.4501
UKB	AST	SSL	0.167396	0.00638827	1	0
UKB	ALP	C+T	0.233558	0.00528127	6	31.2666
UKB	ALP	uaPGS	0.103082	0.00305773	10	197.418
UKB	ALP	LDpred2_inf	0.235222	0.00569888	5	30.3382
UKB	ALP	LDpred2_auto	0.233121	0.00568692	7	31.5123
UKB	ALP	PRS-CS	0.293307	0.00619939	2	4.52633
UKB	ALP	PRS-CSauto	0.182777	0.00491786	9	67.7361
UKB	ALP	Lassosum	0.258198	0.0054926	3	18.7396
UKB	ALP	Lassosum2	0.248026	0.00576171	4	23.6093
UKB	ALP	Allsum	0.232951	0.00555469	8	31.6084
UKB	ALP	SSL	0.306584	0.00641165	1	0
UKB	ALT	C+T	0.148402	0.00226776	5	36.1347
UKB	ALT	uaPGS	0.0662772	0.00167537	10	204.821
UKB	ALT	LDpred2_inf	0.134388	0.00224052	7	50.3309
UKB	ALT	LDpred2_auto	0.130831	0.00223105	8	54.4186
UKB	ALT	PRS-CS	0.195062	0.00241565	2	3.5708
UKB	ALT	PRS-CSauto	0.101069	0.00168187	9	99.8901
UKB	ALT	Lassosum	0.173458	0.00218325	3	16.4701
UKB	ALT	Lassosum2	0.159558	0.00199644	4	26.6167
UKB	ALT	Allsum	0.139107	0.00195282	6	45.2316
UKB	ALT	SSL	0.202027	0.00240319	1	0
UKB	TBIL	C+T	0.285243	0.00252477	5	46.2785
UKB	TBIL	uaPGS	0.280843	0.00175951	6	48.5704
UKB	TBIL	LDpred2_inf	0.326613	0.00253037	3	27.7501
UKB	TBIL	LDpred2_auto	0.320637	0.00258305	4	30.1311
UKB	TBIL	PRS-CS	0.253518	0.00338798	7	64.5838
UKB	TBIL	PRS-CSauto	0.149563	0.00203402	10	178.978
UKB	TBIL	Lassosum	0.253444	0.0018895	8	64.6316
UKB	TBIL	Lassosum2	0.249839	0.00260675	9	67.0069
UKB	TBIL	Allsum	0.333283	0.00207399	2	25.1934
UKB	TBIL	SSL	0.417249	0.00257803	1	0
UKB	SCR	C+T	0.157974	0.00826785	6	30.5574
UKB	SCR	uaPGS	0.0705603	0.0037336	10	192.299
UKB	SCR	LDpred2_inf	0.15298	0.00775508	7	34.8194
UKB	SCR	LDpred2_auto	0.151462	0.00768312	8	36.1709
UKB	SCR	PRS-CS	0.204883	0.0100212	2	0.665781
UKB	SCR	PRS-CSauto	0.116045	0.00623226	9	77.73
UKB	SCR	Lassosum	0.187519	0.00929772	3	9.98712
UKB	SCR	Lassosum2	0.170451	0.0084146	4	21.0004
UKB	SCR	Allsum	0.159643	0.00838822	5	29.1926
UKB	SCR	SSL	0.206247	0.00996517	1	0
UKB	BUN	C+T	0.208655	0.00205905	5	33.6802
UKB	BUN	uaPGS	0.113633	0.00107699	10	145.467
UKB	BUN	LDpred2_inf	0.177029	0.00180945	7	57.5619
UKB	BUN	LDpred2_auto	0.170188	0.00174193	8	63.8961
UKB	BUN	PRS-CS	0.267945	0.00224925	2	4.10009
UKB	BUN	PRS-CSauto	0.139055	0.0010949	9	100.59
UKB	BUN	Lassosum	0.239061	0.00220862	3	16.6775
UKB	BUN	Lassosum2	0.218933	0.00191682	4	27.4048
UKB	BUN	Allsum	0.186858	0.00192868	6	49.274
UKB	BUN	SSL	0.278931	0.00150757	1	0
UKB	SUA	C+T	0.263034	0.000796575	4	31.4421
UKB	SUA	uaPGS	0.13554	0.00111611	10	155.082
UKB	SUA	LDpred2_inf	0.259034	0.00114135	5	33.4718
UKB	SUA	LDpred2_auto	0.257946	0.00114272	6	34.0347
UKB	SUA	PRS-CS	0.323396	0.00161909	2	6.90847
UKB	SUA	PRS-CSauto	0.156231	0.00118461	9	121.299
UKB	SUA	Lassosum	0.274845	0.00146997	3	25.7937
UKB	SUA	Lassosum2	0.161185	0.00145382	8	114.497
UKB	SUA	Allsum	0.230059	0.00131992	7	50.2819
UKB	SUA	SSL	0.345738	0.00180963	1	0

## Sheet: Supplemental Data 4
Type	Trait	Methods	Mean	Se	Rank	Improvement_pentage ((SSL Mean – Method Mean) / Method Mean × 100%)
DFTJ	Height	C+T	0.10233	0.00496721	9	72.2666
DFTJ	Height	uaPGS	0.102286	0.00481782	10	72.3416
DFTJ	Height	LDpred2_inf	0.13105	0.00703588	7	34.5143
DFTJ	Height	LDpred2_auto	0.128698	0.00699994	8	36.9719
DFTJ	Height	PRS-CS	0.165021	0.0074458	4	6.82301
DFTJ	Height	PRS-CSauto	0.170018	0.00670592	3	3.68353
DFTJ	Height	Lassosum	0.175129	0.0069099	2	0.657408
DFTJ	Height	Lassosum2	0.163476	0.00816178	5	7.83284
DFTJ	Height	Allsum	0.162624	0.00623002	6	8.39751
DFTJ	Height	SSL	0.176281	0.0069876	1	0
DFTJ	Weight	C+T	0.0781594	0.00406028	10	40.545
DFTJ	Weight	uaPGS	0.0782929	0.00440383	9	40.3055
DFTJ	Weight	LDpred2_inf	0.0825294	0.00324384	8	33.103
DFTJ	Weight	LDpred2_auto	0.0843075	0.00330107	7	30.2959
DFTJ	Weight	PRS-CS	0.102393	0.00523288	4	7.28237
DFTJ	Weight	PRS-CSauto	0.106694	0.00632039	2	2.95707
DFTJ	Weight	Lassosum	0.10257	0.00428608	3	7.09651
DFTJ	Weight	Lassosum2	0.0933641	0.00552376	5	17.6568
DFTJ	Weight	Allsum	0.0901407	0.00428895	6	21.8641
DFTJ	Weight	SSL	0.109849	0.00493181	1	0
DFTJ	Waist	C+T	0.034769	0.00546896	8	17.8119
DFTJ	Waist	uaPGS	0.0350816	0.0053994	7	16.7621
DFTJ	Waist	LDpred2_inf	0.035155	0.00508995	6	16.5185
DFTJ	Waist	LDpred2_auto	0.0365628	0.00542092	5	12.0319
DFTJ	Waist	PRS-CS	0.0402364	0.00625948	2	1.80358
DFTJ	Waist	PRS-CSauto	0.0389584	0.00505797	3	5.1431
DFTJ	Waist	Lassosum	0.0381421	0.00541026	4	7.39331
DFTJ	Waist	Lassosum2	0.0273995	0.00420566	10	49.4992
DFTJ	Waist	Allsum	0.0329713	0.00470592	9	24.2355
DFTJ	Waist	SSL	0.040962	0.00712615	1	0
DFTJ	BMI	C+T	0.067041	0.00469104	9	38.5127
DFTJ	BMI	uaPGS	0.0670391	0.00469128	10	38.5166
DFTJ	BMI	LDpred2_inf	0.0693551	0.00432596	8	33.8911
DFTJ	BMI	LDpred2_auto	0.071544	0.00449693	7	29.7947
DFTJ	BMI	PRS-CS	0.085045	0.00408747	4	9.18964
DFTJ	BMI	PRS-CSauto	0.0874032	0.00410123	3	6.24354
DFTJ	BMI	Lassosum	0.0888197	0.00511107	2	4.54918
DFTJ	BMI	Lassosum2	0.0789085	0.00358033	5	17.681
DFTJ	BMI	Allsum	0.0768792	0.00428126	6	20.7873
DFTJ	BMI	SSL	0.0928603	0.0043189	1	0
DFTJ	SBP	C+T	0.0220988	0.0020393	9	54.3052
DFTJ	SBP	uaPGS	0.0216664	0.00206814	10	57.3851
DFTJ	SBP	LDpred2_inf	0.0253022	0.00256171	8	34.7692
DFTJ	SBP	LDpred2_auto	0.0260487	0.00263451	7	30.9071
DFTJ	SBP	PRS-CS	0.0316386	0.00399576	3	7.77849
DFTJ	SBP	PRS-CSauto	0.0323934	0.00354413	2	5.26732
DFTJ	SBP	Lassosum	0.0308	0.0032606	4	10.7133
DFTJ	SBP	Lassosum2	0.027285	0.00348496	5	24.9759
DFTJ	SBP	Allsum	0.0269681	0.00286142	6	26.4443
DFTJ	SBP	SSL	0.0340996	0.00344842	1	0
DFTJ	DBP	C+T	0.0150842	0.0024688	10	51.1428
DFTJ	DBP	uaPGS	0.0152845	0.00206921	9	49.1622
DFTJ	DBP	LDpred2_inf	0.0172228	0.00194208	8	32.3751
DFTJ	DBP	LDpred2_auto	0.0176334	0.00201145	7	29.2932
DFTJ	DBP	PRS-CS	0.0217321	0.0031057	2	4.90792
DFTJ	DBP	PRS-CSauto	0.0215974	0.00315859	3	5.56262
DFTJ	DBP	Lassosum	0.0205429	0.00340508	4	10.981
DFTJ	DBP	Lassosum2	0.0182311	0.00325736	5	25.0539
DFTJ	DBP	Allsum	0.017995	0.00258608	6	26.6952
DFTJ	DBP	SSL	0.0227987	0.00378714	1	0
DFTJ	PP	C+T	0.00885657	0.00191831	10	71.9355
DFTJ	PP	uaPGS	0.00887294	0.00190579	9	71.6183
DFTJ	PP	LDpred2_inf	0.00904101	0.00215615	8	68.4279
DFTJ	PP	LDpred2_auto	0.00977508	0.00223308	7	55.7797
DFTJ	PP	PRS-CS	0.0132663	0.00242718	3	14.7843
DFTJ	PP	PRS-CSauto	0.0132557	0.00265192	4	14.8755
DFTJ	PP	Lassosum	0.0100076	0.00169356	6	52.16
DFTJ	PP	Lassosum2	0.0142732	0.00308747	2	6.68653
DFTJ	PP	Allsum	0.0102678	0.00228175	5	48.3043
DFTJ	PP	SSL	0.0152276	0.00166105	1	0
DFTJ	HDL	C+T	0.0254603	0.00219892	9	152.15
DFTJ	HDL	uaPGS	0.0215203	0.00212821	10	198.313
DFTJ	HDL	LDpred2_inf	0.0267043	0.00200832	8	140.403
DFTJ	HDL	LDpred2_auto	0.0325541	0.00204043	7	97.204
DFTJ	HDL	PRS-CS	0.0618648	0.00277537	2	3.77134
DFTJ	HDL	PRS-CSauto	0.0595373	0.00261406	5	7.82815
DFTJ	HDL	Lassosum	0.0602562	0.00325179	4	6.54173
DFTJ	HDL	Lassosum2	0.0612776	0.00388892	3	4.76571
DFTJ	HDL	Allsum	0.0576716	0.00253114	6	11.3164
DFTJ	HDL	SSL	0.064198	0.00263463	1	0
DFTJ	LDL	C+T	0.0258332	0.00290149	8	206.184
DFTJ	LDL	uaPGS	0.0215113	0.00340521	10	267.701
DFTJ	LDL	LDpred2_inf	0.0224516	0.00362465	9	252.301
DFTJ	LDL	LDpred2_auto	0.0449011	0.00455371	7	76.1589
DFTJ	LDL	PRS-CS	0.0578807	0.00420496	6	36.6556
DFTJ	LDL	PRS-CSauto	0.0613007	0.00419696	4	29.0317
DFTJ	LDL	Lassosum	0.0639328	0.00453544	3	23.7195
DFTJ	LDL	Lassosum2	0.0667195	0.00495208	2	18.5519
DFTJ	LDL	Allsum	0.0600483	0.0044433	5	31.7228
DFTJ	LDL	SSL	0.0790973	0.00417293	1	0
DFTJ	TC	C+T	0.0455897	0.00228616	8	109.911
DFTJ	TC	uaPGS	0.0373765	0.00283403	10	156.037
DFTJ	TC	LDpred2_inf	0.0396295	0.00318322	9	141.482
DFTJ	TC	LDpred2_auto	0.051429	0.00331851	7	86.0777
DFTJ	TC	PRS-CS	0.0927325	0.00421918	2	3.19775
DFTJ	TC	PRS-CSauto	0.0911749	0.00375085	4	4.96081
DFTJ	TC	Lassosum	0.0841342	0.00390723	5	13.7443
DFTJ	TC	Lassosum2	0.0914814	0.00381904	3	4.60906
DFTJ	TC	Allsum	0.0834238	0.00445057	6	14.7129
DFTJ	TC	SSL	0.0956979	0.00377702	1	0
DFTJ	TG	C+T	0.0328345	0.00482651	10	141.975
DFTJ	TG	uaPGS	0.0347315	0.00407092	9	128.758
DFTJ	TG	LDpred2_inf	0.0358587	0.0037162	8	121.567
DFTJ	TG	LDpred2_auto	0.0409279	0.00419426	7	94.1248
DFTJ	TG	PRS-CS	0.0737577	0.00727483	2	7.71905
DFTJ	TG	PRS-CSauto	0.0713176	0.00714776	4	11.4046
DFTJ	TG	Lassosum	0.0694863	0.00722742	5	14.3408
DFTJ	TG	Lassosum2	0.0543007	0.00586258	6	46.3171
DFTJ	TG	Allsum	0.0733833	0.00739057	3	8.26869
DFTJ	TG	SSL	0.0794511	0.00771563	1	0
DFTJ	FBG	C+T	0.0130961	0.0022165	9	89.2323
DFTJ	FBG	uaPGS	0.0130586	0.00223681	10	89.7755
DFTJ	FBG	LDpred2_inf	0.0138296	0.0020277	8	79.1947
DFTJ	FBG	LDpred2_auto	0.0165456	0.00214627	7	49.7797
DFTJ	FBG	PRS-CS	0.0236197	0.0018741	3	4.92111
DFTJ	FBG	PRS-CSauto	0.0238647	0.00212729	2	3.84374
DFTJ	FBG	Lassosum	0.021702	0.0020991	4	14.1922
DFTJ	FBG	Lassosum2	0.0200348	0.00190146	5	23.6946
DFTJ	FBG	Allsum	0.0189227	0.00231101	6	30.9647
DFTJ	FBG	SSL	0.024782	0.0017009	1	0
DFTJ	RBC	C+T	0.0451458	0.00408234	9	94.2357
DFTJ	RBC	uaPGS	0.0449293	0.00375249	10	95.1719
DFTJ	RBC	LDpred2_inf	0.0544948	0.00411552	8	60.913
DFTJ	RBC	LDpred2_auto	0.057475	0.00425158	7	52.5693
DFTJ	RBC	PRS-CS	0.0863213	0.00554806	2	1.58481
DFTJ	RBC	PRS-CSauto	0.0858555	0.00530068	3	2.13588
DFTJ	RBC	Lassosum	0.080475	0.00583166	4	8.96469
DFTJ	RBC	Lassosum2	0.0804367	0.00575948	5	9.0165
DFTJ	RBC	Allsum	0.0733878	0.00476924	6	19.4876
DFTJ	RBC	SSL	0.0876893	0.00500955	1	0
DFTJ	MCV	C+T	0.0336834	0.00438222	8	98.6106
DFTJ	MCV	uaPGS	0.0286227	0.00368093	10	133.726
DFTJ	MCV	LDpred2_inf	0.0328819	0.00408775	9	103.452
DFTJ	MCV	LDpred2_auto	0.042634	0.00461965	7	56.9142
DFTJ	MCV	PRS-CS	0.0628567	0.00404462	3	6.43076
DFTJ	MCV	PRS-CSauto	0.063821	0.00451921	2	4.82266
DFTJ	MCV	Lassosum	0.0599748	0.00455531	5	11.545
DFTJ	MCV	Lassosum2	0.0627741	0.00462787	4	6.57089
DFTJ	MCV	Allsum	0.05225	0.00534668	6	28.0362
DFTJ	MCV	SSL	0.0668989	0.00456944	1	0
DFTJ	MCH	C+T	0.0307156	0.00447634	8	104.689
DFTJ	MCH	uaPGS	0.0257613	0.00346156	10	144.054
DFTJ	MCH	LDpred2_inf	0.0283103	0.0033311	9	122.08
DFTJ	MCH	LDpred2_auto	0.0470474	0.00411654	7	33.6346
DFTJ	MCH	PRS-CS	0.0579628	0.00384168	4	8.46893
DFTJ	MCH	PRS-CSauto	0.0582431	0.00347205	3	7.94689
DFTJ	MCH	Lassosum	0.0558614	0.00504936	5	12.5493
DFTJ	MCH	Lassosum2	0.0583625	0.00458197	2	7.72601
DFTJ	MCH	Allsum	0.0484596	0.00459994	6	29.7401
DFTJ	MCH	SSL	0.0628716	0.00398807	1	0
DFTJ	MCHC	C+T	0.00822815	0.00164898	7	115.339
DFTJ	MCHC	uaPGS	0.00513564	0.00157678	9	245.009
DFTJ	MCHC	LDpred2_inf	0.00510485	0.00164202	10	247.091
DFTJ	MCHC	LDpred2_auto	0.0184391	0.00281615	1	-3.90836
DFTJ	MCHC	PRS-CS	0.0165862	0.00267027	4	6.82657
DFTJ	MCHC	PRS-CSauto	0.0150155	0.00305728	6	18.001
DFTJ	MCHC	Lassosum	0.0164386	0.00252529	5	7.78543
DFTJ	MCHC	Lassosum2	0.0175177	0.00254139	3	1.14589
DFTJ	MCHC	Allsum	0.00756579	0.00189932	8	134.192
DFTJ	MCHC	SSL	0.0177185	0.00290536	2	0
DFTJ	HGB	C+T	0.0243846	0.00323236	9	93.1575
DFTJ	HGB	uaPGS	0.0243782	0.00323	10	93.2082
DFTJ	HGB	LDpred2_inf	0.0284053	0.00292845	8	65.8166
DFTJ	HGB	LDpred2_auto	0.0311167	0.00325499	7	51.3679
DFTJ	HGB	PRS-CS	0.0451524	0.00449364	3	4.31514
DFTJ	HGB	PRS-CSauto	0.0443218	0.00536807	5	6.26991
DFTJ	HGB	Lassosum	0.046315	0.00513285	2	1.69653
DFTJ	HGB	Lassosum2	0.0450586	0.00479084	4	4.53212
DFTJ	HGB	Allsum	0.0375616	0.00446982	6	25.3959
DFTJ	HGB	SSL	0.0471007	0.00524248	1	0
DFTJ	HCT	C+T	0.0277503	0.00341758	9	83.7259
DFTJ	HCT	uaPGS	0.027481	0.00351191	10	85.5263
DFTJ	HCT	LDpred2_inf	0.0332662	0.00412801	8	53.2623
DFTJ	HCT	LDpred2_auto	0.0350168	0.00417838	7	45.6002
DFTJ	HCT	PRS-CS	0.0489741	0.00477926	2	4.10508
DFTJ	HCT	PRS-CSauto	0.0476883	0.00483011	3	6.91201
DFTJ	HCT	Lassosum	0.0463017	0.00421115	4	10.1138
DFTJ	HCT	Lassosum2	0.0440547	0.00415426	5	15.7301
DFTJ	HCT	Allsum	0.0393862	0.00388487	6	29.4478
DFTJ	HCT	SSL	0.0509845	0.00475802	1	0
DFTJ	WBC	C+T	0.0371418	0.00416492	10	72.441
DFTJ	WBC	uaPGS	0.037646	0.00408078	9	70.1315
DFTJ	WBC	LDpred2_inf	0.0434438	0.00474421	8	47.4264
DFTJ	WBC	LDpred2_auto	0.0456347	0.00482205	7	40.3486
DFTJ	WBC	PRS-CS	0.0578531	0.00437746	4	10.7075
DFTJ	WBC	PRS-CSauto	0.0588976	0.00444343	3	8.74412
DFTJ	WBC	Lassosum	0.0592452	0.0048674	2	8.10607
DFTJ	WBC	Lassosum2	0.0573362	0.00513283	5	11.7055
DFTJ	WBC	Allsum	0.0515755	0.00514412	6	24.1823
DFTJ	WBC	SSL	0.0640477	0.00460256	1	0
DFTJ	LYM	C+T	0.0171405	0.00263543	6	52.3746
DFTJ	LYM	uaPGS	0.0161603	0.00201346	9	61.6169
DFTJ	LYM	LDpred2_inf	0.0163508	0.00199449	7	59.7341
DFTJ	LYM	LDpred2_auto	0.0181479	0.00212552	5	43.9161
DFTJ	LYM	PRS-CS	0.0200346	0.00189134	3	30.3633
DFTJ	LYM	PRS-CSauto	0.0203382	0.0022674	2	28.4172
DFTJ	LYM	Lassosum	0.0193872	0.00211063	4	34.7165
DFTJ	LYM	Lassosum2	0.0141662	0.00226541	10	84.3669
DFTJ	LYM	Allsum	0.0163168	0.00243292	8	60.0667
DFTJ	LYM	SSL	0.0261178	0.00282966	1	0
DFTJ	MONO	C+T	0.0171595	0.00269551	8	99.9693
DFTJ	MONO	uaPGS	0.0150834	0.00204474	10	127.493
DFTJ	MONO	LDpred2_inf	0.0151385	0.00203235	9	126.666
DFTJ	MONO	LDpred2_auto	0.0236104	0.00282914	6	45.3331
DFTJ	MONO	PRS-CS	0.026584	0.00368465	5	29.0769
DFTJ	MONO	PRS-CSauto	0.0285817	0.00310118	3	20.0551
DFTJ	MONO	Lassosum	0.0287606	0.00403184	2	19.3082
DFTJ	MONO	Lassosum2	0.0275561	0.00410585	4	24.5236
DFTJ	MONO	Allsum	0.0189319	0.0029561	7	81.2485
DFTJ	MONO	SSL	0.0343138	0.0040591	1	0
DFTJ	NEUT	C+T	0.0156113	0.0018056	8	111.52
DFTJ	NEUT	uaPGS	0.0132352	0.00172143	10	149.494
DFTJ	NEUT	LDpred2_inf	0.0140075	0.00208962	9	135.739
DFTJ	NEUT	LDpred2_auto	0.0263152	0.00227466	4	25.4825
DFTJ	NEUT	PRS-CS	0.0257758	0.00273921	5	28.1086
DFTJ	NEUT	PRS-CSauto	0.0248224	0.00188219	6	33.0293
DFTJ	NEUT	Lassosum	0.0270946	0.00205868	3	21.873
DFTJ	NEUT	Lassosum2	0.0272503	0.00181893	2	21.1769
DFTJ	NEUT	Allsum	0.0217034	0.00240679	7	52.1464
DFTJ	NEUT	SSL	0.033021	0.00237016	1	0
DFTJ	EOS	C+T	0.0128007	0.00224981	7	62.98
DFTJ	EOS	uaPGS	0.0104465	0.00456762	10	99.7087
DFTJ	EOS	LDpred2_inf	0.0109546	0.00475822	8	90.4456
DFTJ	EOS	LDpred2_auto	0.0180126	0.00516158	5	15.8218
DFTJ	EOS	PRS-CS	0.0188178	0.001882	4	10.8662
DFTJ	EOS	PRS-CSauto	0.0170519	0.00534368	6	22.3472
DFTJ	EOS	Lassosum	0.0192205	0.00166228	3	8.54332
DFTJ	EOS	Lassosum2	0.0198089	0.00135567	2	5.31887
DFTJ	EOS	Allsum	0.0105765	0.00221282	9	97.2544
DFTJ	EOS	SSL	0.0208626	0.00246325	1	0
DFTJ	BASO	C+T	0.0038446	0.00103448	8	58.2308
DFTJ	BASO	uaPGS	0.00245565	0.00112641	10	147.728
DFTJ	BASO	LDpred2_inf	0.0026932	0.00127581	9	125.878
DFTJ	BASO	LDpred2_auto	0.00508881	0.00156301	6	19.5434
DFTJ	BASO	PRS-CS	0.00680178	0.000988863	1	-10.5626
DFTJ	BASO	PRS-CSauto	0.0055914	0.00142511	5	8.79817
DFTJ	BASO	Lassosum	0.00575408	0.000987969	4	5.72226
DFTJ	BASO	Lassosum2	0.00578426	0.00123801	3	5.17062
DFTJ	BASO	Allsum	0.00402127	0.00154106	7	51.2789
DFTJ	BASO	SSL	0.00608334	0.00124087	2	0
DFTJ	PLT	C+T	0.0651358	0.00427118	9	78.274
DFTJ	PLT	uaPGS	0.0614703	0.00450769	10	88.9045
DFTJ	PLT	LDpred2_inf	0.0736126	0.00580713	8	57.745
DFTJ	PLT	LDpred2_auto	0.0755279	0.00578125	7	53.7447
DFTJ	PLT	PRS-CS	0.114823	0.00586726	3	1.12934
DFTJ	PLT	PRS-CSauto	0.115417	0.00608802	2	0.609111
DFTJ	PLT	Lassosum	0.114021	0.00688534	4	1.84074
DFTJ	PLT	Lassosum2	0.111913	0.00684002	5	3.75936
DFTJ	PLT	Allsum	0.0994112	0.00735422	6	16.808
DFTJ	PLT	SSL	0.11612	0.00744836	1	0
DFTJ	AST	C+T	0.00890501	0.00233602	9	29.038
DFTJ	AST	uaPGS	0.00877642	0.00198663	10	30.9288
DFTJ	AST	LDpred2_inf	0.00896878	0.00195056	8	28.1206
DFTJ	AST	LDpred2_auto	0.00971125	0.00204021	6	18.3252
DFTJ	AST	PRS-CS	0.0120161	0.00211526	3	-4.37098
DFTJ	AST	PRS-CSauto	0.0125291	0.0022276	1	-8.28645
DFTJ	AST	Lassosum	0.0114249	0.00226858	5	0.577573
DFTJ	AST	Lassosum2	0.0120517	0.00220242	2	-4.65329
DFTJ	AST	Allsum	0.00917652	0.00223205	7	25.2201
DFTJ	AST	SSL	0.0114909	0.00241958	4	0
DFTJ	ALP	C+T	0.0302433	0.00418917	8	89.4213
DFTJ	ALP	uaPGS	0.0185017	0.00284305	10	209.633
DFTJ	ALP	LDpred2_inf	0.0193937	0.00274052	9	195.391
DFTJ	ALP	LDpred2_auto	0.0438784	0.00276694	6	30.5595
DFTJ	ALP	PRS-CS	0.050385	0.00382549	2	13.6993
DFTJ	ALP	PRS-CSauto	0.0492577	0.00371551	4	16.3014
DFTJ	ALP	Lassosum	0.0399293	0.00353704	7	43.472
DFTJ	ALP	Lassosum2	0.0494226	0.00404146	3	15.9133
DFTJ	ALP	Allsum	0.0479825	0.00372437	5	19.3922
DFTJ	ALP	SSL	0.0572873	0.00450715	1	0
DFTJ	ALT	C+T	0.00995135	0.00183467	10	57.6758
DFTJ	ALT	uaPGS	0.0105337	0.00211697	9	48.959
DFTJ	ALT	LDpred2_inf	0.0112646	0.00233743	8	39.2934
DFTJ	ALT	LDpred2_auto	0.0128019	0.00254862	7	22.5666
DFTJ	ALT	PRS-CS	0.0167112	0.00260324	1	-6.10558
DFTJ	ALT	PRS-CSauto	0.0165051	0.00262049	2	-4.93333
DFTJ	ALT	Lassosum	0.0143465	0.00181288	5	9.37041
DFTJ	ALT	Lassosum2	0.0145662	0.00186624	4	7.72093
DFTJ	ALT	Allsum	0.0129002	0.00265246	6	21.6323
DFTJ	ALT	SSL	0.0156909	0.00231057	3	0
DFTJ	TBIL	C+T	0.0325214	0.00356379	8	198.632
DFTJ	TBIL	uaPGS	0.0169572	0.00234432	10	472.732
DFTJ	TBIL	LDpred2_inf	0.0186644	0.00296666	9	420.344
DFTJ	TBIL	LDpred2_auto	0.0522533	0.00745818	7	85.8621
DFTJ	TBIL	PRS-CS	0.0847052	0.00881443	2	14.6555
DFTJ	TBIL	PRS-CSauto	0.0795436	0.00856437	5	22.0954
DFTJ	TBIL	Lassosum	0.0783933	0.00781991	6	23.8871
DFTJ	TBIL	Lassosum2	0.0833192	0.00955496	4	16.5628
DFTJ	TBIL	Allsum	0.0839407	0.00964405	3	15.6997
DFTJ	TBIL	SSL	0.0971191	0.010938	1	0
DFTJ	SCR	C+T	0.00625199	0.00210302	10	90.2822
DFTJ	SCR	uaPGS	0.0074962	0.00184406	7	58.6995
DFTJ	SCR	LDpred2_inf	0.00749539	0.0018969	8	58.7167
DFTJ	SCR	LDpred2_auto	0.00777188	0.00191882	6	53.0701
DFTJ	SCR	PRS-CS	0.0110799	0.00270717	3	7.3692
DFTJ	SCR	PRS-CSauto	0.0116003	0.00283512	2	2.55238
DFTJ	SCR	Lassosum	0.0108838	0.00313313	4	9.30414
DFTJ	SCR	Lassosum2	0.00998475	0.0027816	5	19.1459
DFTJ	SCR	Allsum	0.00678061	0.00219189	9	75.4477
DFTJ	SCR	SSL	0.0118964	0.00331149	1	0
DFTJ	BUN	C+T	0.0229937	0.00483205	7	65.9195
DFTJ	BUN	uaPGS	0.0174203	0.00377623	10	119.003
DFTJ	BUN	LDpred2_inf	0.0195013	0.00326617	9	95.6339
DFTJ	BUN	LDpred2_auto	0.022183	0.00358019	8	71.9833
DFTJ	BUN	PRS-CS	0.0375096	0.00483179	4	1.71028
DFTJ	BUN	PRS-CSauto	0.0389679	0.00464919	1	-2.09618
DFTJ	BUN	Lassosum	0.0369815	0.0045477	5	3.16262
DFTJ	BUN	Lassosum2	0.0386389	0.00450276	2	-1.26253
DFTJ	BUN	Allsum	0.028438	0.00380683	6	34.1552
DFTJ	BUN	SSL	0.0381511	0.0043838	3	0
DFTJ	SUA	C+T	0.0362026	0.00413766	4	55.7442
DFTJ	SUA	uaPGS	0.0335718	0.00316312	6	67.9486
DFTJ	SUA	LDpred2_inf	0.0301793	0.00356574	9	86.8283
DFTJ	SUA	LDpred2_auto	0.033181	0.00390623	7	69.9268
DFTJ	SUA	PRS-CS	0.0342446	0.00416964	5	64.649
DFTJ	SUA	PRS-CSauto	0.0331078	0.00384804	8	70.3023
DFTJ	SUA	Lassosum	0.0417533	0.00472906	3	35.0395
DFTJ	SUA	Lassosum2	0.0255347	0.00339875	10	120.811
DFTJ	SUA	Allsum	0.055248	0.00444942	2	2.05517
DFTJ	SUA	SSL	0.0563834	0.00444537	1	0

## Sheet: Supplemental Data 5
Type	Trait	Methods	Mean	Se	Rank	Improvement_pentage ((pSSL Mean – Method Mean) / Method Mean × 100%)
DFTJ	Height	C+T	0.101972	0.00786677	9	90.3615
DFTJ	Height	Lassosum2	0.165793	0.00784342	6	17.0831
DFTJ	Height	SSL	0.174121	0.00873464	4	11.483
DFTJ	Height	C+T_EUR	0.085223	0.00747779	10	127.774
DFTJ	Height	Lassosum2_EUR	0.139127	0.00756451	7	39.5238
DFTJ	Height	SSL_EUR	0.121064	0.00827409	8	60.3416
DFTJ	Height	PRS-CSx	0.187361	0.00663811	3	3.60504
DFTJ	Height	CT-SLEB	0.167749	0.00924671	5	15.718
DFTJ	Height	PROSPER	0.203506	0.00947058	1	-4.61444
DFTJ	Height	pSSL	0.194116	0.00875059	2	0
DFTJ	Weight	C+T	0.0771068	0.00553919	7	49.7471
DFTJ	Weight	Lassosum2	0.08961	0.00523385	6	28.853
DFTJ	Weight	SSL	0.104853	0.00556909	3	10.1207
DFTJ	Weight	C+T_EUR	0.0432308	0.00567959	10	167.09
DFTJ	Weight	Lassosum2_EUR	0.0520308	0.00528241	9	121.917
DFTJ	Weight	SSL_EUR	0.0537481	0.00596775	8	114.827
DFTJ	Weight	PRS-CSx	0.104787	0.00797123	4	10.1905
DFTJ	Weight	CT-SLEB	0.0967973	0.00690606	5	19.2856
DFTJ	Weight	PROSPER	0.116476	0.00776501	1	-0.867414
DFTJ	Weight	pSSL	0.115465	0.00791285	2	0
DFTJ	Waist	C+T	0.0338588	0.00303653	6	47.3644
DFTJ	Waist	Lassosum2	0.0254571	0.00409283	9	95.9996
DFTJ	Waist	SSL	0.0379813	0.00376097	5	31.3695
DFTJ	Waist	C+T_EUR	0.0250084	0.00595892	10	99.5166
DFTJ	Waist	Lassosum2_EUR	0.0284241	0.00498797	8	75.5408
DFTJ	Waist	SSL_EUR	0.0326428	0.0060465	7	52.854
DFTJ	Waist	PRS-CSx	0.0468418	0.0054956	4	6.51988
DFTJ	Waist	CT-SLEB	0.0528853	0.00700701	1	-5.65275
DFTJ	Waist	PROSPER	0.0516598	0.00534802	2	-3.41468
DFTJ	Waist	pSSL	0.0498958	0.00457472	3	0
DFTJ	BMI	C+T	0.0697596	0.00849559	7	55.0378
DFTJ	BMI	Lassosum2	0.0780648	0.00878573	6	38.5435
DFTJ	BMI	SSL	0.0921693	0.00881159	5	17.3424
DFTJ	BMI	C+T_EUR	0.0489501	0.00378047	10	120.947
DFTJ	BMI	Lassosum2_EUR	0.0564607	0.00767263	8	91.5559
DFTJ	BMI	SSL_EUR	0.0554272	0.00524989	9	95.1276
DFTJ	BMI	PRS-CSx	0.100316	0.00835977	3	7.81316
DFTJ	BMI	CT-SLEB	0.0931688	0.0081674	4	16.0836
DFTJ	BMI	PROSPER	0.108278	0.00979914	1	-0.115262
DFTJ	BMI	pSSL	0.108154	0.00885579	2	0
DFTJ	SBP	C+T	0.0220988	0.0020393	9	111.47
DFTJ	SBP	Lassosum2	0.027285	0.00348496	8	71.2748
DFTJ	SBP	SSL	0.0341812	0.00346501	5	36.7193
DFTJ	SBP	C+T_EUR	0.02176	0.00365603	10	114.762
DFTJ	SBP	Lassosum2_EUR	0.0349611	0.00361161	4	33.6695
DFTJ	SBP	SSL_EUR	0.030954	0.0031782	7	50.9733
DFTJ	SBP	PRS-CSx	0.0405665	0.00407067	2	15.1992
DFTJ	SBP	CT-SLEB	0.0367462	0.00336131	3	27.1759
DFTJ	SBP	PROSPER	0.0319523	0.0036728	6	46.2563
DFTJ	SBP	pSSL	0.0467323	0.00360522	1	0
DFTJ	DBP	C+T	0.0150842	0.0024688	10	124.686
DFTJ	DBP	Lassosum2	0.0182311	0.00325736	8	85.9024
DFTJ	DBP	SSL	0.0230295	0.00373768	6	47.1682
DFTJ	DBP	C+T_EUR	0.0161349	0.00138225	9	110.054
DFTJ	DBP	Lassosum2_EUR	0.0279008	0.00258561	4	21.4734
DFTJ	DBP	SSL_EUR	0.0231384	0.00178136	5	46.4756
DFTJ	DBP	PRS-CSx	0.0346464	0.00349348	1	-2.17701
DFTJ	DBP	CT-SLEB	0.0315526	0.00316244	3	7.41448
DFTJ	DBP	PROSPER	0.0219889	0.00308861	7	54.1329
DFTJ	DBP	pSSL	0.0338921	0.00359953	2	0
DFTJ	PP	C+T	0.00885657	0.00191831	10	294.829
DFTJ	PP	Lassosum2	0.0142732	0.00308747	8	144.993
DFTJ	PP	SSL	0.0148818	0.00152512	7	134.974
DFTJ	PP	C+T_EUR	0.0222636	0.00363603	6	57.0652
DFTJ	PP	Lassosum2_EUR	0.0353875	0.00339299	2	-1.18449
DFTJ	PP	SSL_EUR	0.028947	0.00362849	5	20.8013
DFTJ	PP	PRS-CSx	0.0359423	0.00527369	1	-2.70984
DFTJ	PP	CT-SLEB	0.0349379	0.00520835	4	0.0871126
DFTJ	PP	PROSPER	0.0142686	0.00196429	9	145.071
DFTJ	PP	pSSL	0.0349683	0.00414502	3	0
DFTJ	HDL	C+T	0.0319262	0.00458077	9	220.049
DFTJ	HDL	Lassosum2	0.0766724	0.00818307	6	33.2677
DFTJ	HDL	SSL	0.082493	0.0075941	4	23.8646
DFTJ	HDL	C+T_EUR	0.0277882	0.00344935	10	267.709
DFTJ	HDL	Lassosum2_EUR	0.0571336	0.00499588	8	78.8432
DFTJ	HDL	SSL_EUR	0.0629679	0.00272609	7	62.2725
DFTJ	HDL	PRS-CSx	0.078534	0.00638295	5	30.1087
DFTJ	HDL	CT-SLEB	0.0832306	0.00820426	3	22.7669
DFTJ	HDL	PROSPER	0.0915492	0.00697308	2	11.6116
DFTJ	HDL	pSSL	0.10218	0.00481041	1	0
DFTJ	LDL	C+T	0.0261267	0.00324007	9	282.05
DFTJ	LDL	Lassosum2	0.068483	0.00471783	5	45.7546
DFTJ	LDL	SSL	0.0811092	0.00471909	3	23.0652
DFTJ	LDL	C+T_EUR	0.0258288	0.00345795	10	286.457
DFTJ	LDL	Lassosum2_EUR	0.0345582	0.00462716	8	188.838
DFTJ	LDL	SSL_EUR	0.0487969	0.00607585	7	104.557
DFTJ	LDL	PRS-CSx	0.0607619	0.00453948	6	64.276
DFTJ	LDL	CT-SLEB	0.0697367	0.00640638	4	43.1343
DFTJ	LDL	PROSPER	0.0902762	0.00395344	2	10.5686
DFTJ	LDL	pSSL	0.0998171	0.00524578	1	0
DFTJ	TC	C+T	0.0410138	0.00490789	9	141.046
DFTJ	TC	Lassosum2	0.0845833	0.0076848	5	16.8813
DFTJ	TC	SSL	0.086969	0.00657908	4	13.6751
DFTJ	TC	C+T_EUR	0.0363352	0.00446885	10	172.083
DFTJ	TC	Lassosum2_EUR	0.0576902	0.00696006	7	71.3671
DFTJ	TC	SSL_EUR	0.0517606	0.00602419	8	90.9986
DFTJ	TC	PRS-CSx	0.0907689	0.00588557	3	8.91623
DFTJ	TC	CT-SLEB	0.0828295	0.0073875	6	19.3562
DFTJ	TC	PROSPER	0.0967613	0.00663335	2	2.17105
DFTJ	TC	pSSL	0.0988621	0.00659266	1	0
DFTJ	TG	C+T	0.0333324	0.00326638	10	176.931
DFTJ	TG	Lassosum2	0.0574265	0.00549958	7	60.7411
DFTJ	TG	SSL	0.082087	0.00715169	3	12.4513
DFTJ	TG	C+T_EUR	0.0389156	0.00351324	9	137.2
DFTJ	TG	Lassosum2_EUR	0.0533378	0.00441252	8	73.0631
DFTJ	TG	SSL_EUR	0.0656706	0.00410754	6	40.5621
DFTJ	TG	PRS-CSx	0.0769158	0.00366296	4	20.0117
DFTJ	TG	CT-SLEB	0.0729414	0.00694586	5	26.5508
DFTJ	TG	PROSPER	0.0884844	0.00429623	2	4.32118
DFTJ	TG	pSSL	0.092308	0.00634374	1	0
DFTJ	FBG	C+T	0.013484	0.00370682	7	108.871
DFTJ	FBG	Lassosum2	0.0224468	0.00416487	6	25.4708
DFTJ	FBG	SSL	0.0272458	0.00374187	3	3.37053
DFTJ	FBG	C+T_EUR	0.00556001	0.00143117	10	406.549
DFTJ	FBG	Lassosum2_EUR	0.00738645	0.002708	9	281.295
DFTJ	FBG	SSL_EUR	0.00957227	0.00250377	8	194.227
DFTJ	FBG	PRS-CSx	0.0265812	0.00362288	4	5.95507
DFTJ	FBG	CT-SLEB	0.0231217	0.00337887	5	21.8086
DFTJ	FBG	PROSPER	0.0273363	0.00431473	2	3.02837
DFTJ	FBG	pSSL	0.0281642	0.00406001	1	0
DFTJ	RBC	C+T	0.0451458	0.00408234	9	116.111
DFTJ	RBC	Lassosum2	0.0804367	0.00575948	5	21.2941
DFTJ	RBC	SSL	0.0874609	0.00522981	4	11.5527
DFTJ	RBC	C+T_EUR	0.0339442	0.0028061	10	187.428
DFTJ	RBC	Lassosum2_EUR	0.0600311	0.00610613	8	62.5242
DFTJ	RBC	SSL_EUR	0.0621524	0.00356115	7	56.9771
DFTJ	RBC	PRS-CSx	0.0919777	0.00656976	2	6.07465
DFTJ	RBC	CT-SLEB	0.0793775	0.00609295	6	22.9127
DFTJ	RBC	PROSPER	0.0886939	0.00516921	3	10.002
DFTJ	RBC	pSSL	0.097565	0.00530086	1	0
DFTJ	MCV	C+T	0.0336834	0.00438222	9	129.781
DFTJ	MCV	Lassosum2	0.0627741	0.00462787	5	23.2964
DFTJ	MCV	SSL	0.0668903	0.004592	3	15.709
DFTJ	MCV	C+T_EUR	0.0270228	0.00397632	10	186.417
DFTJ	MCV	Lassosum2_EUR	0.0497662	0.00387845	7	55.5235
DFTJ	MCV	SSL_EUR	0.0455175	0.00461056	8	70.0403
DFTJ	MCV	PRS-CSx	0.0695707	0.00491045	2	11.251
DFTJ	MCV	CT-SLEB	0.0627316	0.00555075	6	23.3798
DFTJ	MCV	PROSPER	0.0665707	0.0048268	4	16.2646
DFTJ	MCV	pSSL	0.0773981	0.00459009	1	0
DFTJ	MCH	C+T	0.0307156	0.00447634	9	123.655
DFTJ	MCH	Lassosum2	0.0583625	0.00458197	6	17.7072
DFTJ	MCH	SSL	0.0628716	0.00398807	2	9.26537
DFTJ	MCH	C+T_EUR	0.0205076	0.00197908	10	234.983
DFTJ	MCH	Lassosum2_EUR	0.0481372	0.00430641	7	42.7105
DFTJ	MCH	SSL_EUR	0.040557	0.00372938	8	69.3837
DFTJ	MCH	PRS-CSx	0.0624352	0.00403146	3	10.029
DFTJ	MCH	CT-SLEB	0.0591526	0.00668663	5	16.135
DFTJ	MCH	PROSPER	0.0615314	0.00510366	4	11.6452
DFTJ	MCH	pSSL	0.0686969	0.00400024	1	0
DFTJ	MCHC	C+T	0.00822815	0.00164898	9	165.087
DFTJ	MCHC	Lassosum2	0.0175177	0.00254139	7	24.5126
DFTJ	MCHC	SSL	0.01783	0.00290825	6	22.3322
DFTJ	MCHC	C+T_EUR	0.00646275	0.0016466	10	237.5
DFTJ	MCHC	Lassosum2_EUR	0.0184401	0.00274228	5	18.2847
DFTJ	MCHC	SSL_EUR	0.00988489	0.00193934	8	120.658
DFTJ	MCHC	PRS-CSx	0.0208036	0.00231379	2	4.84591
DFTJ	MCHC	CT-SLEB	0.0207031	0.00311167	3	5.35485
DFTJ	MCHC	PROSPER	0.0193579	0.00324368	4	12.6762
DFTJ	MCHC	pSSL	0.0218118	0.00267211	1	0
DFTJ	HGB	C+T	0.0243846	0.00323236	9	143.76
DFTJ	HGB	Lassosum2	0.0450586	0.00479084	4	31.9171
DFTJ	HGB	SSL	0.0473404	0.00516481	3	25.5588
DFTJ	HGB	C+T_EUR	0.0120546	0.0024502	10	393.089
DFTJ	HGB	Lassosum2_EUR	0.0342407	0.00385632	7	73.5945
DFTJ	HGB	SSL_EUR	0.0283653	0.00258038	8	109.552
DFTJ	HGB	PRS-CSx	0.0488123	0.00629003	2	21.7728
DFTJ	HGB	CT-SLEB	0.0450149	0.00431625	5	32.0453
DFTJ	HGB	PROSPER	0.0441579	0.00519508	6	34.6078
DFTJ	HGB	pSSL	0.05944	0.00463964	1	0
DFTJ	HCT	C+T	0.0277503	0.00341758	9	131.047
DFTJ	HCT	Lassosum2	0.0440547	0.00415426	7	45.5377
DFTJ	HCT	SSL	0.0497323	0.00465708	4	28.9225
DFTJ	HCT	C+T_EUR	0.016555	0.00304617	10	287.292
DFTJ	HCT	Lassosum2_EUR	0.0449034	0.00486781	6	42.787
DFTJ	HCT	SSL_EUR	0.0359837	0.0042104	8	78.1811
DFTJ	HCT	PRS-CSx	0.0603852	0.00506111	2	6.1787
DFTJ	HCT	CT-SLEB	0.0512908	0.00503631	3	25.0052
DFTJ	HCT	PROSPER	0.0456304	0.00467199	5	40.5119
DFTJ	HCT	pSSL	0.0641162	0.00539274	1	0
DFTJ	WBC	C+T	0.0371418	0.00416492	9	106.123
DFTJ	WBC	Lassosum2	0.0573362	0.00513283	6	33.5246
DFTJ	WBC	SSL	0.0640043	0.00458523	4	19.6136
DFTJ	WBC	C+T_EUR	0.0217155	0.00365168	10	252.55
DFTJ	WBC	Lassosum2_EUR	0.0508505	0.00540969	7	50.5548
DFTJ	WBC	SSL_EUR	0.0410426	0.00428366	8	86.5328
DFTJ	WBC	PRS-CSx	0.0752834	0.00663936	2	1.69296
DFTJ	WBC	CT-SLEB	0.0660847	0.00402626	3	15.8482
DFTJ	WBC	PROSPER	0.0631406	0.00581906	5	21.2499
DFTJ	WBC	pSSL	0.0765579	0.00608786	1	0
DFTJ	LYM	C+T	0.0171405	0.00263543	8	166.665
DFTJ	LYM	Lassosum2	0.0141662	0.00226541	9	222.653
DFTJ	LYM	SSL	0.0257479	0.00273937	6	77.5201
DFTJ	LYM	C+T_EUR	0.0120285	0.00190026	10	279.995
DFTJ	LYM	Lassosum2_EUR	0.0273123	0.00380007	4	67.3522
DFTJ	LYM	SSL_EUR	0.0264451	0.00383346	5	72.8402
DFTJ	LYM	PRS-CSx	0.0428974	0.00514735	2	6.55117
DFTJ	LYM	CT-SLEB	0.0339381	0.00439342	3	34.6794
DFTJ	LYM	PROSPER	0.0220492	0.00187116	7	107.298
DFTJ	LYM	pSSL	0.0457077	0.00511753	1	0
DFTJ	MONO	C+T	0.0171595	0.00269551	9	188.37
DFTJ	MONO	Lassosum2	0.0275561	0.00410585	8	79.5722
DFTJ	MONO	SSL	0.0342674	0.00405406	6	44.4027
DFTJ	MONO	C+T_EUR	0.0169476	0.00183857	10	191.977
DFTJ	MONO	Lassosum2_EUR	0.0360103	0.00497256	4	37.4134
DFTJ	MONO	SSL_EUR	0.0293775	0.00341408	7	68.4384
DFTJ	MONO	PRS-CSx	0.0481901	0.00551184	2	2.68292
DFTJ	MONO	CT-SLEB	0.0433988	0.00492627	3	14.0194
DFTJ	MONO	PROSPER	0.0346099	0.00437509	5	42.9736
DFTJ	MONO	pSSL	0.049483	0.00568875	1	0
DFTJ	NEUT	C+T	0.0156113	0.0018056	10	274.41
DFTJ	NEUT	Lassosum2	0.0272503	0.00181893	8	114.494
DFTJ	NEUT	SSL	0.0329242	0.00237746	6	77.5293
DFTJ	NEUT	C+T_EUR	0.023522	0.00223705	9	148.492
DFTJ	NEUT	Lassosum2_EUR	0.0520522	0.00237609	4	12.2915
DFTJ	NEUT	SSL_EUR	0.0397233	0.00356867	5	47.1432
DFTJ	NEUT	PRS-CSx	0.0568835	0.00457849	2	2.75422
DFTJ	NEUT	CT-SLEB	0.0531743	0.00329895	3	9.92178
DFTJ	NEUT	PROSPER	0.0318113	0.00213548	7	83.7401
DFTJ	NEUT	pSSL	0.0584502	0.00437715	1	0
DFTJ	EOS	C+T	0.0128007	0.00224981	8	122.23
DFTJ	EOS	Lassosum2	0.0198089	0.00135567	7	43.6067
DFTJ	EOS	SSL	0.0208626	0.00246325	6	36.3542
DFTJ	EOS	C+T_EUR	0.00549106	0.00133529	10	418.06
DFTJ	EOS	Lassosum2_EUR	0.0224748	0.00198832	4	26.5726
DFTJ	EOS	SSL_EUR	0.0126752	0.00162442	9	124.429
DFTJ	EOS	PRS-CSx	0.033417	0.00352859	1	-14.8729
DFTJ	EOS	CT-SLEB	0.0259223	0.0039661	3	9.73943
DFTJ	EOS	PROSPER	0.0215806	0.0023193	5	31.8174
DFTJ	EOS	pSSL	0.028447	0.00353291	2	0
DFTJ	BASO	C+T	0.0038446	0.00103448	9	129.226
DFTJ	BASO	Lassosum2	0.00578426	0.00123801	6	52.3587
DFTJ	BASO	SSL	0.00587053	0.00113245	5	50.1197
DFTJ	BASO	C+T_EUR	0.00284447	0.00119303	10	209.823
DFTJ	BASO	Lassosum2_EUR	0.00525431	0.00127638	7	67.7256
DFTJ	BASO	SSL_EUR	0.00522125	0.00103361	8	68.7876
DFTJ	BASO	PRS-CSx	0.0087584	0.00149723	3	0.621375
DFTJ	BASO	CT-SLEB	0.00933518	0.00194037	1	-5.59561
DFTJ	BASO	PROSPER	0.00712739	0.00145027	4	23.6472
DFTJ	BASO	pSSL	0.00881282	0.00149954	2	0
DFTJ	PLT	C+T	0.0651358	0.00427118	9	101.289
DFTJ	PLT	Lassosum2	0.111913	0.00684002	6	17.1544
DFTJ	PLT	SSL	0.116112	0.00743685	5	12.9178
DFTJ	PLT	C+T_EUR	0.0492653	0.00482488	10	166.133
DFTJ	PLT	Lassosum2_EUR	0.0828173	0.00510237	7	58.3136
DFTJ	PLT	SSL_EUR	0.0797126	0.00591537	8	64.4797
DFTJ	PLT	PRS-CSx	0.125464	0.00735976	2	4.50085
DFTJ	PLT	CT-SLEB	0.12053	0.0067715	3	8.77876
DFTJ	PLT	PROSPER	0.119274	0.00638878	4	9.92468
DFTJ	PLT	pSSL	0.131111	0.00772488	1	0
DFTJ	AST	C+T	0.007047	0.00196851	9	119.862
DFTJ	AST	Lassosum2	0.0129527	0.00303322	5	19.617
DFTJ	AST	SSL	0.0118766	0.00306516	6	30.4555
DFTJ	AST	C+T_EUR	0.0059781	0.00166288	10	159.174
DFTJ	AST	Lassosum2_EUR	0.00977505	0.00207844	7	58.5023
DFTJ	AST	SSL_EUR	0.00969601	0.00252592	8	59.7944
DFTJ	AST	PRS-CSx	0.015369	0.00322978	2	0.811051
DFTJ	AST	CT-SLEB	0.0131385	0.00288682	4	17.9255
DFTJ	AST	PROSPER	0.0147162	0.00399388	3	5.28306
DFTJ	AST	pSSL	0.0154937	0.00285328	1	0
DFTJ	ALP	C+T	0.0302204	0.00443034	9	149.961
DFTJ	ALP	Lassosum2	0.0514581	0.00511203	7	46.7978
DFTJ	ALP	SSL	0.0604763	0.00705273	6	24.9073
DFTJ	ALP	C+T_EUR	0.0218522	0.00408716	10	245.682
DFTJ	ALP	Lassosum2_EUR	0.0345284	0.00393303	8	118.774
DFTJ	ALP	SSL_EUR	0.0667536	0.00726841	4	13.1614
DFTJ	ALP	PRS-CSx	0.0706505	0.0085604	3	6.91976
DFTJ	ALP	CT-SLEB	0.0613009	0.00870663	5	23.227
DFTJ	ALP	PROSPER	0.0751568	0.00820129	2	0.508991
DFTJ	ALP	pSSL	0.0755393	0.00841196	1	0
DFTJ	ALT	C+T	0.00940926	0.0021681	10	169.602
DFTJ	ALT	Lassosum2	0.0177127	0.00332113	7	43.2171
DFTJ	ALT	SSL	0.019478	0.00424106	6	30.2372
DFTJ	ALT	C+T_EUR	0.011015	0.00303246	9	130.301
DFTJ	ALT	Lassosum2_EUR	0.0196316	0.00500065	5	29.218
DFTJ	ALT	SSL_EUR	0.0171682	0.00466255	8	47.7593
DFTJ	ALT	PRS-CSx	0.0226411	0.00430419	3	12.0422
DFTJ	ALT	CT-SLEB	0.0202296	0.00449597	4	25.3985
DFTJ	ALT	PROSPER	0.0243403	0.00469281	2	4.22049
DFTJ	ALT	pSSL	0.0253676	0.00540732	1	0
DFTJ	TBIL	C+T	0.0336444	0.00437892	10	343.153
DFTJ	TBIL	Lassosum2	0.0869185	0.00509312	6	71.5356
DFTJ	TBIL	SSL	0.101645	0.00775957	4	46.6827
DFTJ	TBIL	C+T_EUR	0.0979413	0.00823226	5	52.2302
DFTJ	TBIL	Lassosum2_EUR	0.0675782	0.00828536	9	120.628
DFTJ	TBIL	SSL_EUR	0.125266	0.00815666	3	19.0236
DFTJ	TBIL	PRS-CSx	0.0700782	0.00471242	8	112.757
DFTJ	TBIL	CT-SLEB	0.0753613	0.00697277	7	97.8419
DFTJ	TBIL	PROSPER	0.140438	0.00736449	2	6.16486
DFTJ	TBIL	pSSL	0.149096	0.00811918	1	0
DFTJ	SCR	C+T	0.0123343	0.0029592	10	131.434
DFTJ	SCR	Lassosum2	0.0179708	0.0045673	6	58.8448
DFTJ	SCR	SSL	0.0213317	0.00438069	5	33.8187
DFTJ	SCR	C+T_EUR	0.0156714	0.00393508	9	82.1522
DFTJ	SCR	Lassosum2_EUR	0.0170889	0.00271067	8	67.0424
DFTJ	SCR	SSL_EUR	0.0178571	0.00316881	7	59.8569
DFTJ	SCR	PRS-CSx	0.0271133	0.00454874	2	5.28302
DFTJ	SCR	CT-SLEB	0.0246593	0.00408876	4	15.7603
DFTJ	SCR	PROSPER	0.026918	0.00444887	3	6.04699
DFTJ	SCR	pSSL	0.0285457	0.0041915	1	0
DFTJ	BUN	C+T	0.0222221	0.00281642	8	87.7276
DFTJ	BUN	Lassosum2	0.0375723	0.00321662	6	11.0315
DFTJ	BUN	SSL	0.0378905	0.00329806	4	10.0991
DFTJ	BUN	C+T_EUR	0.0113539	0.00178498	10	267.426
DFTJ	BUN	Lassosum2_EUR	0.0247399	0.00278503	7	68.6228
DFTJ	BUN	SSL_EUR	0.0208505	0.00235969	9	100.077
DFTJ	BUN	PRS-CSx	0.0378759	0.00316667	5	10.1414
DFTJ	BUN	CT-SLEB	0.0389256	0.00290996	3	7.17125
DFTJ	BUN	PROSPER	0.0422531	0.00323391	1	-1.26858
DFTJ	BUN	pSSL	0.0417171	0.00287978	2	0
DFTJ	SUA	C+T	0.035938	0.00545493	7	125.915
DFTJ	SUA	Lassosum2	0.0229744	0.00472479	9	253.389
DFTJ	SUA	SSL	0.0580288	0.00802841	6	39.9119
DFTJ	SUA	C+T_EUR	0.0228738	0.00326888	10	254.943
DFTJ	SUA	Lassosum2_EUR	0.02963	0.00314972	8	174.01
DFTJ	SUA	SSL_EUR	0.0640946	0.00491877	4	26.6707
DFTJ	SUA	PRS-CSx	0.0715282	0.00859761	3	13.5064
DFTJ	SUA	CT-SLEB	0.0609921	0.00849112	5	33.1142
DFTJ	SUA	PROSPER	0.0731261	0.00732207	2	11.0262
DFTJ	SUA	pSSL	0.0811891	0.00710882	1	0

## Sheet: Supplemental Data 6
Methods	Population	Trait	Mean	Se	Rank	Improvement_pentage ((pSSL Mean – Method Mean) / Method Mean × 100%)
C+T	EAS	Height	0.0970569	0.00130881	9	82.9827
Lassosum2	EAS	Height	0.14281	0.00190235	5	24.359
SSL	EAS	Height	0.160292	0.0018517	3	10.7961
C+T_EUR	EAS	Height	0.064109	0.00097635	10	177.024
Lassosum2_EUR	EAS	Height	0.107293	0.00129028	7	65.526
SSL_EUR	EAS	Height	0.0970576	0.00156367	8	82.9815
PRS-CSx	EAS	Height	0.200539	0.00210046	1	-11.4398
CT-SLEB	EAS	Height	0.132923	0.00152208	6	33.609
PROSPER	EAS	Height	0.155637	0.00152706	4	14.1101
pSSL	EAS	Height	0.177597	0.00191742	2	0
C+T	EAS	LDL	0.0568875	0.00122885	8	59.1192
Lassosum2	EAS	LDL	0.067251	0.0014199	5	34.5988
SSL	EAS	LDL	0.0759581	0.00158428	4	19.1696
C+T_EUR	EAS	LDL	0.0227376	0.000798094	10	298.103
Lassosum2_EUR	EAS	LDL	0.064533	0.0013605	6	40.2677
SSL_EUR	EAS	LDL	0.0422674	0.0011013	9	114.158
PRS-CSx	EAS	LDL	0.0885675	0.00170747	3	2.20335
CT-SLEB	EAS	LDL	0.0618322	0.00117654	7	46.3945
PROSPER	EAS	LDL	0.0902991	0.00164997	2	0.243448
pSSL	EAS	LDL	0.090519	0.00178354	1	0
C+T	EAS	HDL	0.0808672	0.00131215	8	70.0084
Lassosum2	EAS	HDL	0.0700526	0.00141712	9	96.2539
SSL	EAS	HDL	0.101773	0.00180029	6	35.0854
C+T_EUR	EAS	HDL	0.063151	0.00115803	10	117.702
Lassosum2_EUR	EAS	HDL	0.106946	0.00158282	5	28.5518
SSL_EUR	EAS	HDL	0.0967368	0.00156046	7	42.1187
PRS-CSx	EAS	HDL	0.134683	0.00181864	3	2.07764
CT-SLEB	EAS	HDL	0.116809	0.00168891	4	17.6977
PROSPER	EAS	HDL	0.135985	0.00189638	2	1.10039
pSSL	EAS	HDL	0.137481	0.00206084	1	0
C+T	EAS	TC	0.0591487	0.00111361	6	34.7092
Lassosum2	EAS	TC	0.0546413	0.00113182	8	45.8216
SSL	EAS	TC	0.0762654	0.00141293	4	4.47566
C+T_EUR	EAS	TC	0.0358007	0.000920271	9	122.562
Lassosum2_EUR	EAS	TC	0.0576881	0.00108899	7	38.12
SSL_EUR	EAS	TC	0.0354837	0.00100941	10	124.55
PRS-CSx	EAS	TC	0.0847066	0.00143345	2	-5.93563
CT-SLEB	EAS	TC	0.0688837	0.00135538	5	15.6714
PROSPER	EAS	TC	0.0911308	0.00153226	1	-12.5666
pSSL	EAS	TC	0.0796788	0.00149271	3	0
C+T	EAS	TG	0.0600763	0.00126422	6	20.9976
Lassosum2	EAS	TG	0.064902	0.0014835	5	12.0011
SSL	EAS	TG	0.0582018	0.00139056	7	24.8946
C+T_EUR	EAS	TG	0.0229457	0.000729913	10	216.795
Lassosum2_EUR	EAS	TG	0.0416706	0.00105124	9	74.4418
SSL_EUR	EAS	TG	0.047999	0.00109579	8	51.4425
PRS-CSx	EAS	TG	0.0773389	0.0014212	1	-6.00992
CT-SLEB	EAS	TG	0.0721376	0.00148961	3	0.7671
PROSPER	EAS	TG	0.0703904	0.00150723	4	3.26817
pSSL	EAS	TG	0.0726909	0.00159089	2	0
C+T	EAS	ASTHMA	0.738278	0.00240174	6	4.8813
Lassosum2	EAS	ASTHMA	0.74583	0.00219642	5	3.81931
SSL	EAS	ASTHMA	0.774472	0.00202713	1	-0.0202253
C+T_EUR	EAS	ASTHMA	0.531891	0.00210316	8	45.5779
Lassosum2_EUR	EAS	ASTHMA	0.520036	0.00213316	10	48.8967
SSL_EUR	EAS	ASTHMA	0.524602	0.00219673	9	47.6007
PRS-CSx	EAS	ASTHMA	0.75715	0.00205633	3	2.26714
CT-SLEB	EAS	ASTHMA	0.73681	0.00234493	7	5.09031
PROSPER	EAS	ASTHMA	0.748417	0.00219156	4	3.46053
pSSL	EAS	ASTHMA	0.774316	0.00207651	2	0
C+T	AFR	Height	0.0206741	0.000504284	10	370.104
Lassosum2	AFR	Height	0.0365242	0.000552619	8	166.097
SSL	AFR	Height	0.0467439	0.000773819	7	107.92
C+T_EUR	AFR	Height	0.0244779	0.000455502	9	297.052
Lassosum2_EUR	AFR	Height	0.0617953	0.000740675	5	57.2769
SSL_EUR	AFR	Height	0.0563223	0.000695377	6	72.5601
PRS-CSx	AFR	Height	0.0827096	0.000841927	3	17.5072
CT-SLEB	AFR	Height	0.069053	0.000809789	4	40.7466
PROSPER	AFR	Height	0.0993563	0.000915428	1	-2.18065
pSSL	AFR	Height	0.0971897	0.000952543	2	0
C+T	AFR	LDL	0.0979352	0.000900189	5	33.1462
Lassosum2	AFR	LDL	0.0689909	0.0008816	7	89.006
SSL	AFR	LDL	0.12024	0.00094521	2	8.44711
C+T_EUR	AFR	LDL	0.00966484	0.000341562	10	1249.19
Lassosum2_EUR	AFR	LDL	0.0568695	0.000703938	9	129.292
SSL_EUR	AFR	LDL	0.0602624	0.000862205	8	116.382
PRS-CSx	AFR	LDL	0.112319	0.000977638	4	16.0954
CT-SLEB	AFR	LDL	0.0948081	0.000882988	6	37.5378
PROSPER	AFR	LDL	0.116645	0.000901875	3	11.7894
pSSL	AFR	LDL	0.130397	0.000977772	1	0
C+T	AFR	HDL	0.0603613	0.000892293	6	51.6918
Lassosum2	AFR	HDL	0.0546836	0.000808367	7	67.4418
SSL	AFR	HDL	0.0855681	0.00095918	3	7.00613
C+T_EUR	AFR	HDL	0.0156791	0.000434386	10	483.983
Lassosum2_EUR	AFR	HDL	0.0423042	0.000720175	9	116.44
SSL_EUR	AFR	HDL	0.0480033	0.000820507	8	90.7434
PRS-CSx	AFR	HDL	0.0750521	0.00100028	4	21.9994
CT-SLEB	AFR	HDL	0.0707855	0.000969729	5	29.353
PROSPER	AFR	HDL	0.0902997	0.00101983	2	1.39922
pSSL	AFR	HDL	0.0915631	0.00100762	1	0
C+T	AFR	TC	0.0731835	0.000895773	5	42.2075
Lassosum2	AFR	TC	0.0709015	0.000784886	6	46.7845
SSL	AFR	TC	0.0939291	0.00089164	2	10.7989
C+T_EUR	AFR	TC	0.0162215	0.000418139	10	541.571
Lassosum2_EUR	AFR	TC	0.0439021	0.000688712	8	137.056
SSL_EUR	AFR	TC	0.0325918	0.000553164	9	219.321
PRS-CSx	AFR	TC	0.0884164	0.000902531	4	17.7072
CT-SLEB	AFR	TC	0.0671965	0.000891219	7	54.8779
PROSPER	AFR	TC	0.0923526	0.000890525	3	12.6903
pSSL	AFR	TC	0.104072	0.000913668	1	0
C+T	AFR	TG	0.0124776	0.000374511	9	162.407
Lassosum2	AFR	TG	0.0138901	0.000438106	8	135.724
SSL	AFR	TG	0.0218315	0.000504172	5	49.9771
C+T_EUR	AFR	TG	0.00835961	0.000262789	10	291.671
Lassosum2_EUR	AFR	TG	0.021609	0.000419992	6	51.5208
SSL_EUR	AFR	TG	0.0191185	0.000503396	7	71.259
PRS-CSx	AFR	TG	0.0267164	0.000511986	3	22.5545
CT-SLEB	AFR	TG	0.0300417	0.000526432	2	8.98913
PROSPER	AFR	TG	0.0222119	0.000528953	4	47.408
pSSL	AFR	TG	0.0327422	0.000621448	1	0
C+T	AFR	ASTHMA	0.794914	0.00173538	6	0.309493
Lassosum2	AFR	ASTHMA	0.800099	0.00171337	2	-0.340547
SSL	AFR	ASTHMA	0.792708	0.00169712	7	0.58869
C+T_EUR	AFR	ASTHMA	0.545105	0.00141336	8	46.2792
Lassosum2_EUR	AFR	ASTHMA	0.530842	0.0013927	10	50.2095
SSL_EUR	AFR	ASTHMA	0.542985	0.00129857	9	46.8501
PRS-CSx	AFR	ASTHMA	0.797356	0.00171487	5	0.00229812
CT-SLEB	AFR	ASTHMA	0.798655	0.00165593	3	-0.160256
PROSPER	AFR	ASTHMA	0.807806	0.00170203	1	-1.29131
pSSL	AFR	ASTHMA	0.797375	0.0016781	4	0
C+T	SAS	Height	0.0244649	0.000475499	10	614.076
Lassosum2	SAS	Height	0.0481608	0.000591144	9	262.738
SSL	SAS	Height	0.0558298	0.000610747	8	212.911
C+T_EUR	SAS	Height	0.10663	0.0008046	7	63.8358
Lassosum2_EUR	SAS	Height	0.177731	0.00101035	3	-1.70685
SSL_EUR	SAS	Height	0.171403	0.00100758	5	1.92249
PRS-CSx	SAS	Height	0.20569	0.00108024	1	-15.0674
CT-SLEB	SAS	Height	0.16311	0.0009727	6	7.1043
PROSPER	SAS	Height	0.190548	0.000972712	2	-8.31818
pSSL	SAS	Height	0.174698	0.00100845	4	0
C+T	SAS	LDL	0.0206559	0.000398612	9	124.119
Lassosum2	SAS	LDL	0.0224459	0.000430648	8	106.245
SSL	SAS	LDL	0.0286777	0.000493066	7	61.4273
C+T_EUR	SAS	LDL	0.0174076	0.000357644	10	165.939
Lassosum2_EUR	SAS	LDL	0.0383967	0.00061437	4	20.5669
SSL_EUR	SAS	LDL	0.0313802	0.000516099	6	47.5249
PRS-CSx	SAS	LDL	0.0490351	0.00065744	2	-5.59083
CT-SLEB	SAS	LDL	0.033582	0.00052197	5	37.8525
PROSPER	SAS	LDL	0.0522581	0.000727337	1	-11.4134
pSSL	SAS	LDL	0.0462937	0.000605346	3	0
C+T	SAS	HDL	0.0636981	0.000780088	10	121.919
Lassosum2	SAS	HDL	0.0684928	0.000753868	9	106.384
SSL	SAS	HDL	0.0964476	0.000920017	7	46.5649
C+T_EUR	SAS	HDL	0.0720074	0.000739619	8	96.3108
Lassosum2_EUR	SAS	HDL	0.120305	0.000937501	6	17.5002
SSL_EUR	SAS	HDL	0.133332	0.00107701	4	6.01992
PRS-CSx	SAS	HDL	0.146039	0.00106571	2	-3.2052
CT-SLEB	SAS	HDL	0.130194	0.00101584	5	8.57501
PROSPER	SAS	HDL	0.156642	0.00116221	1	-9.75722
pSSL	SAS	HDL	0.141358	0.00109517	3	0
C+T	SAS	TC	0.0225753	0.000428742	10	127.694
Lassosum2	SAS	TC	0.0243857	0.000394535	9	110.79
SSL	SAS	TC	0.0400502	0.000533727	5	28.345
C+T_EUR	SAS	TC	0.0281547	0.000550093	8	82.5711
Lassosum2_EUR	SAS	TC	0.0435204	0.000740448	4	18.1111
SSL_EUR	SAS	TC	0.0385991	0.000626703	7	33.1701
PRS-CSx	SAS	TC	0.0514748	0.000745171	2	-0.140616
CT-SLEB	SAS	TC	0.0393464	0.00062743	6	30.6406
PROSPER	SAS	TC	0.0524634	0.000714356	1	-2.02227
pSSL	SAS	TC	0.0514024	0.000716209	3	0
C+T	SAS	TG	0.0638964	0.000678459	9	61.723
Lassosum2	SAS	TG	0.0660671	0.000694528	8	56.4093
SSL	SAS	TG	0.0821713	0.000702955	6	25.7558
C+T_EUR	SAS	TG	0.0452238	0.0005847	10	128.497
Lassosum2_EUR	SAS	TG	0.078433	0.00072185	7	31.7496
SSL_EUR	SAS	TG	0.0888659	0.000849416	5	16.2821
PRS-CSx	SAS	TG	0.111427	0.000826591	1	-7.2624
CT-SLEB	SAS	TG	0.102266	0.000926332	4	1.04542
PROSPER	SAS	TG	0.109716	0.000794737	2	-5.81557
pSSL	SAS	TG	0.103335	0.000832278	3	0
C+T	SAS	ASTHMA	0.802761	0.00090888	3	0.314379
Lassosum2	SAS	ASTHMA	0.795897	0.000995165	7	1.17947
SSL	SAS	ASTHMA	0.801523	0.00098447	5	0.469286
C+T_EUR	SAS	ASTHMA	0.55539	0.00105955	10	44.9944
Lassosum2_EUR	SAS	ASTHMA	0.588067	0.00100933	9	36.9375
SSL_EUR	SAS	ASTHMA	0.607302	0.00104823	8	32.6003
PRS-CSx	SAS	ASTHMA	0.799513	0.000958651	6	0.721898
CT-SLEB	SAS	ASTHMA	0.805717	0.000916465	1	-0.0537463
PROSPER	SAS	ASTHMA	0.801896	0.000949406	4	0.422508
pSSL	SAS	ASTHMA	0.805284	0.000969394	2	0

## Sheet: Supplemental Data 7
Figure	Label	GWAS	Heritability	Model	Theta	Mean	Se
1	Sparse II	100000	0.5	Sparse	0.1	0.405569	0.00396479
1	Sparse II	100000	0.5	Sparse	0.01	0.40549	0.00397059
1	Sparse II	100000	0.5	Sparse	0.05	0.405565	0.0039625
1	Sparse II	100000	0.5	Sparse	0.5	0.405309	0.00389655
2	Sparse I	100000	0.5	Sparse	0.1	0.241511	0.00343004
2	Sparse I	100000	0.5	Sparse	0.01	0.241542	0.00342256
2	Sparse I	100000	0.5	Sparse	0.05	0.241608	0.00341384
2	Sparse I	100000	0.5	Sparse	0.5	0.241354	0.00339627
3	Sparse III	100000	0.5	Sparse	0.1	0.181023	0.00232472
3	Sparse III	100000	0.5	Sparse	0.01	0.181067	0.00231159
3	Sparse III	100000	0.5	Sparse	0.05	0.181072	0.00228794
3	Sparse III	100000	0.5	Sparse	0.5	0.181299	0.00232316
4	Infinitesimal	100000	0.5	Infinitesimal	0.1	0.173863	0.00253717
4	Infinitesimal	100000	0.5	Infinitesimal	0.01	0.173706	0.00258134
4	Infinitesimal	100000	0.5	Infinitesimal	0.05	0.173734	0.00256661
4	Infinitesimal	100000	0.5	Infinitesimal	0.5	0.173791	0.00258661
5	Hybrid I	100000	0.5	Hybrid	0.1	0.194767	0.00239103
5	Hybrid I	100000	0.5	Hybrid	0.01	0.19474	0.00239392
5	Hybrid I	100000	0.5	Hybrid	0.05	0.194703	0.00240109
5	Hybrid I	100000	0.5	Hybrid	0.5	0.194742	0.00240057
6	Hybrid II	100000	0.5	Hybrid	0.1	0.178118	0.00188504
6	Hybrid II	100000	0.5	Hybrid	0.01	0.178257	0.00188147
6	Hybrid II	100000	0.5	Hybrid	0.05	0.178211	0.00188812
6	Hybrid II	100000	0.5	Hybrid	0.5	0.178224	0.0019038
7	Hybrid III	100000	0.5	Hybrid	0.1	0.174711	0.00264239
7	Hybrid III	100000	0.5	Hybrid	0.01	0.17465	0.00264575
7	Hybrid III	100000	0.5	Hybrid	0.05	0.174705	0.00261659
7	Hybrid III	100000	0.5	Hybrid	0.5	0.174672	0.00260269
8	Hybrid IV	100000	0.5	Hybrid	0.1	0.174943	0.00167905
8	Hybrid IV	100000	0.5	Hybrid	0.01	0.17495	0.00171472
8	Hybrid IV	100000	0.5	Hybrid	0.05	0.175054	0.00167482
8	Hybrid IV	100000	0.5	Hybrid	0.5	0.175007	0.00170204
9	Heritability = 0.2	100000	0.2	Sparse	0.1	0.0523819	0.00204227
9	Heritability = 0.2	100000	0.2	Sparse	0.01	0.0521037	0.00201772
9	Heritability = 0.2	100000	0.2	Sparse	0.05	0.0521915	0.00197969
9	Heritability = 0.2	100000	0.2	Sparse	0.5	0.0522	0.00198899
10	GWAS N = 10,000	10000	0.5	Sparse	0.1	0.0350945	0.00127465
10	GWAS N = 10,000	10000	0.5	Sparse	0.01	0.034988	0.0013052
10	GWAS N = 10,000	10000	0.5	Sparse	0.05	0.0351337	0.00124311
10	GWAS N = 10,000	10000	0.5	Sparse	0.5	0.0351458	0.0012551
11	GWAS N = 50,000	50000	0.5	Sparse	0.1	0.152175	0.00187269
11	GWAS N = 50,000	50000	0.5	Sparse	0.01	0.152151	0.00185296
11	GWAS N = 50,000	50000	0.5	Sparse	0.05	0.152229	0.00187522
11	GWAS N = 50,000	50000	0.5	Sparse	0.5	0.152244	0.00185571

## Sheet: Supplemental Data 8
GWAS	Heritability	Model	Methods	Mean	Se	max(lambda0)/lamba1	max(beta)/lambda1	Figure_label
100000	0.5	Sparse	SSL1	0.406425	0.00391582	10	1	Sparse II
100000	0.5	Sparse	SSL2	0.252875	0.00321737	10	0.1	Sparse II
100000	0.5	Sparse	SSL3	0.407105	0.00353352	100	1	Sparse II
100000	0.5	Sparse	SSL4	0.391817	0.0046719	100	0.1	Sparse II
100000	0.5	Sparse	SSL	0.405569	0.00396479	1000	1	Sparse II
100000	0.5	Sparse	SSL5	0.384308	0.00571712	1000	0.1	Sparse II
100000	0.5	Sparse	SSL1	0.241461	0.0033962	10	1	Sparse I
100000	0.5	Sparse	SSL2	0.192018	0.00269367	10	0.1	Sparse I
100000	0.5	Sparse	SSL3	0.241267	0.00337115	100	1	Sparse I
100000	0.5	Sparse	SSL4	0.220488	0.00288679	100	0.1	Sparse I
100000	0.5	Sparse	SSL	0.241511	0.00343004	1000	1	Sparse I
100000	0.5	Sparse	SSL5	0.214412	0.00290046	1000	0.1	Sparse I
100000	0.5	Sparse	SSL1	0.181059	0.00230951	10	1	Sparse III
100000	0.5	Sparse	SSL2	0.177137	0.00222155	10	0.1	Sparse III
100000	0.5	Sparse	SSL3	0.179294	0.00228098	100	1	Sparse III
100000	0.5	Sparse	SSL4	0.180195	0.00227419	100	0.1	Sparse III
100000	0.5	Sparse	SSL	0.181023	0.00232472	1000	1	Sparse III
100000	0.5	Sparse	SSL5	0.179255	0.00223463	1000	0.1	Sparse III
100000	0.5	Infinitesimal	SSL1	0.173954	0.0025778	10	1	Infinitesimal
100000	0.5	Infinitesimal	SSL2	0.174877	0.00256266	10	0.1	Infinitesimal
100000	0.5	Infinitesimal	SSL3	0.17021	0.00249592	100	1	Infinitesimal
100000	0.5	Infinitesimal	SSL4	0.174352	0.00251801	100	0.1	Infinitesimal
100000	0.5	Infinitesimal	SSL	0.173863	0.00253717	1000	1	Infinitesimal
100000	0.5	Infinitesimal	SSL5	0.167277	0.00262178	1000	0.1	Infinitesimal
100000	0.5	Hybrid	SSL1	0.194684	0.00239503	10	1	Hybrid I
100000	0.5	Hybrid	SSL2	0.17959	0.00215092	10	0.1	Hybrid I
100000	0.5	Hybrid	SSL3	0.190843	0.00228639	100	1	Hybrid I
100000	0.5	Hybrid	SSL4	0.187107	0.00240019	100	0.1	Hybrid I
100000	0.5	Hybrid	SSL	0.194767	0.00239103	1000	1	Hybrid I
100000	0.5	Hybrid	SSL5	0.185739	0.00228097	1000	0.1	Hybrid I
100000	0.5	Hybrid	SSL1	0.178251	0.00185328	10	1	Hybrid II
100000	0.5	Hybrid	SSL2	0.172986	0.00209212	10	0.1	Hybrid II
100000	0.5	Hybrid	SSL3	0.175248	0.00182587	100	1	Hybrid II
100000	0.5	Hybrid	SSL4	0.175744	0.00188119	100	0.1	Hybrid II
100000	0.5	Hybrid	SSL	0.178118	0.00188504	1000	1	Hybrid II
100000	0.5	Hybrid	SSL5	0.173362	0.00172534	1000	0.1	Hybrid II
100000	0.5	Hybrid	SSL1	0.174753	0.00262523	10	1	Hybrid III
100000	0.5	Hybrid	SSL2	0.171577	0.00243035	10	0.1	Hybrid III
100000	0.5	Hybrid	SSL3	0.170676	0.00272022	100	1	Hybrid III
100000	0.5	Hybrid	SSL4	0.17338	0.00247058	100	0.1	Hybrid III
100000	0.5	Hybrid	SSL	0.174711	0.00264239	1000	1	Hybrid III
100000	0.5	Hybrid	SSL5	0.169539	0.00271488	1000	0.1	Hybrid III
100000	0.5	Hybrid	SSL1	0.175013	0.00167308	10	1	Hybrid IV
100000	0.5	Hybrid	SSL2	0.17483	0.00156718	10	0.1	Hybrid IV
100000	0.5	Hybrid	SSL3	0.172338	0.00176759	100	1	Hybrid IV
100000	0.5	Hybrid	SSL4	0.175389	0.00160986	100	0.1	Hybrid IV
100000	0.5	Hybrid	SSL	0.174943	0.00167905	1000	1	Hybrid IV
100000	0.5	Hybrid	SSL5	0.171881	0.00173845	1000	0.1	Hybrid IV
100000	0.2	Sparse	SSL1	0.0520447	0.00204938	10	1	Heritability = 0.2
100000	0.2	Sparse	SSL2	0.0425891	0.00131821	10	0.1	Heritability = 0.2
100000	0.2	Sparse	SSL3	0.052096	0.00199954	100	1	Heritability = 0.2
100000	0.2	Sparse	SSL4	0.0471522	0.00156421	100	0.1	Heritability = 0.2
100000	0.2	Sparse	SSL	0.0523819	0.00204227	1000	1	Heritability = 0.2
100000	0.2	Sparse	SSL5	0.0468331	0.00155578	1000	0.1	Heritability = 0.2
10000	0.5	Sparse	SSL1	0.0352416	0.00123402	10	1	GWAS N = 10,000
10000	0.5	Sparse	SSL2	0.0333681	0.00128166	10	0.1	GWAS N = 10,000
10000	0.5	Sparse	SSL3	0.0348602	0.00122578	100	1	GWAS N = 10,000
10000	0.5	Sparse	SSL4	0.034019	0.0011692	100	0.1	GWAS N = 10,000
10000	0.5	Sparse	SSL	0.0350945	0.00127465	1000	1	GWAS N = 10,000
10000	0.5	Sparse	SSL5	0.0343141	0.00119996	1000	0.1	GWAS N = 10,000
50000	0.5	Sparse	SSL1	0.15223	0.00186983	10	1	GWAS N = 50,000
50000	0.5	Sparse	SSL2	0.123371	0.00220511	10	0.1	GWAS N = 50,000
50000	0.5	Sparse	SSL3	0.152408	0.00178714	100	1	GWAS N = 50,000
50000	0.5	Sparse	SSL4	0.137539	0.0024052	100	0.1	GWAS N = 50,000
50000	0.5	Sparse	SSL	0.152175	0.00187269	1000	1	GWAS N = 50,000
50000	0.5	Sparse	SSL5	0.134943	0.00254938	1000	0.1	GWAS N = 50,000
