# Supplementary material
Source: Research Square preprint supplement (doi:10.21203/rs.3.rs-10235713/v1)
Supplement: Supplementary file 2 [file dd96db40516bfc088e47151a.docx]

# Supplemental Figures

**
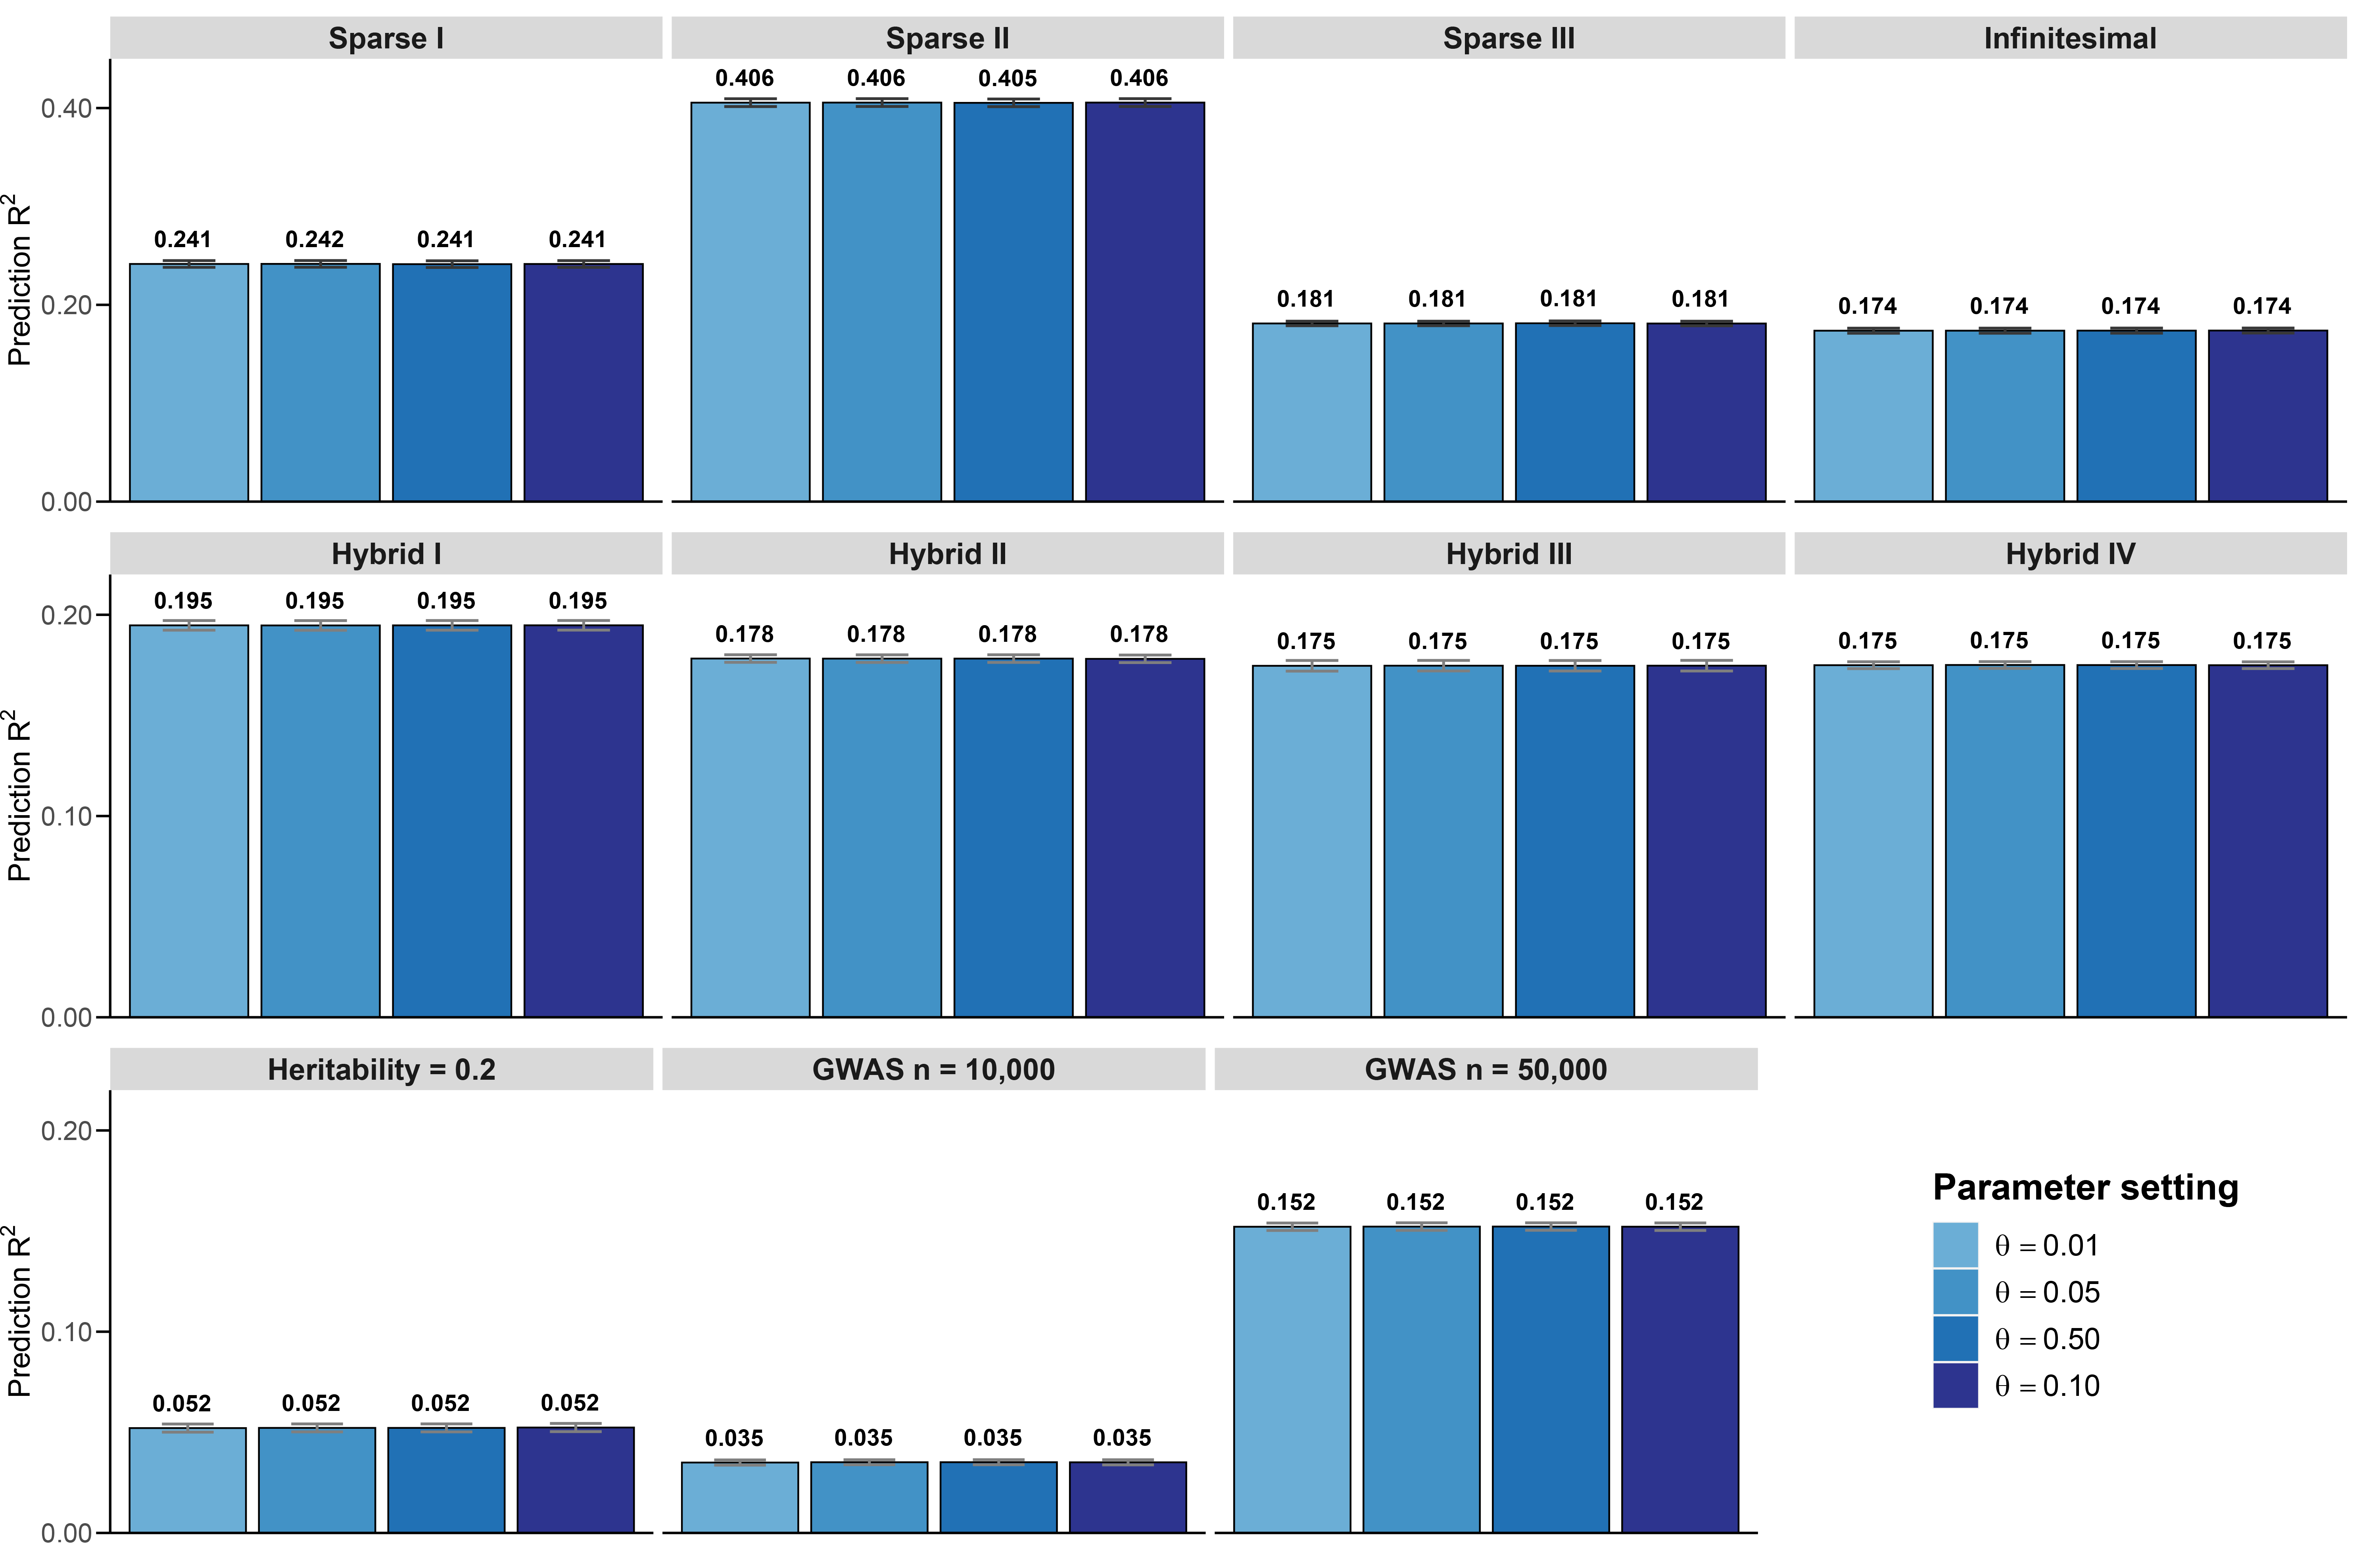
**

**Figure S1. Sensitivity analysis of *θ* selection in single-ancestry simulations.** Performance of SSL (measured by *R*²) was evaluated for across all simulation scenarios. For each , was fixed at and was searched over 10 values evenly spaced from to . The results demonstrate that yielded consistently robust performance across all scenarios, with minimal variation in *R*² compared to other values. This combination was therefore selected as the default setting. denotes the pseudocorrelation estimate of the marginal SNP effect from GWAS summary statistics.


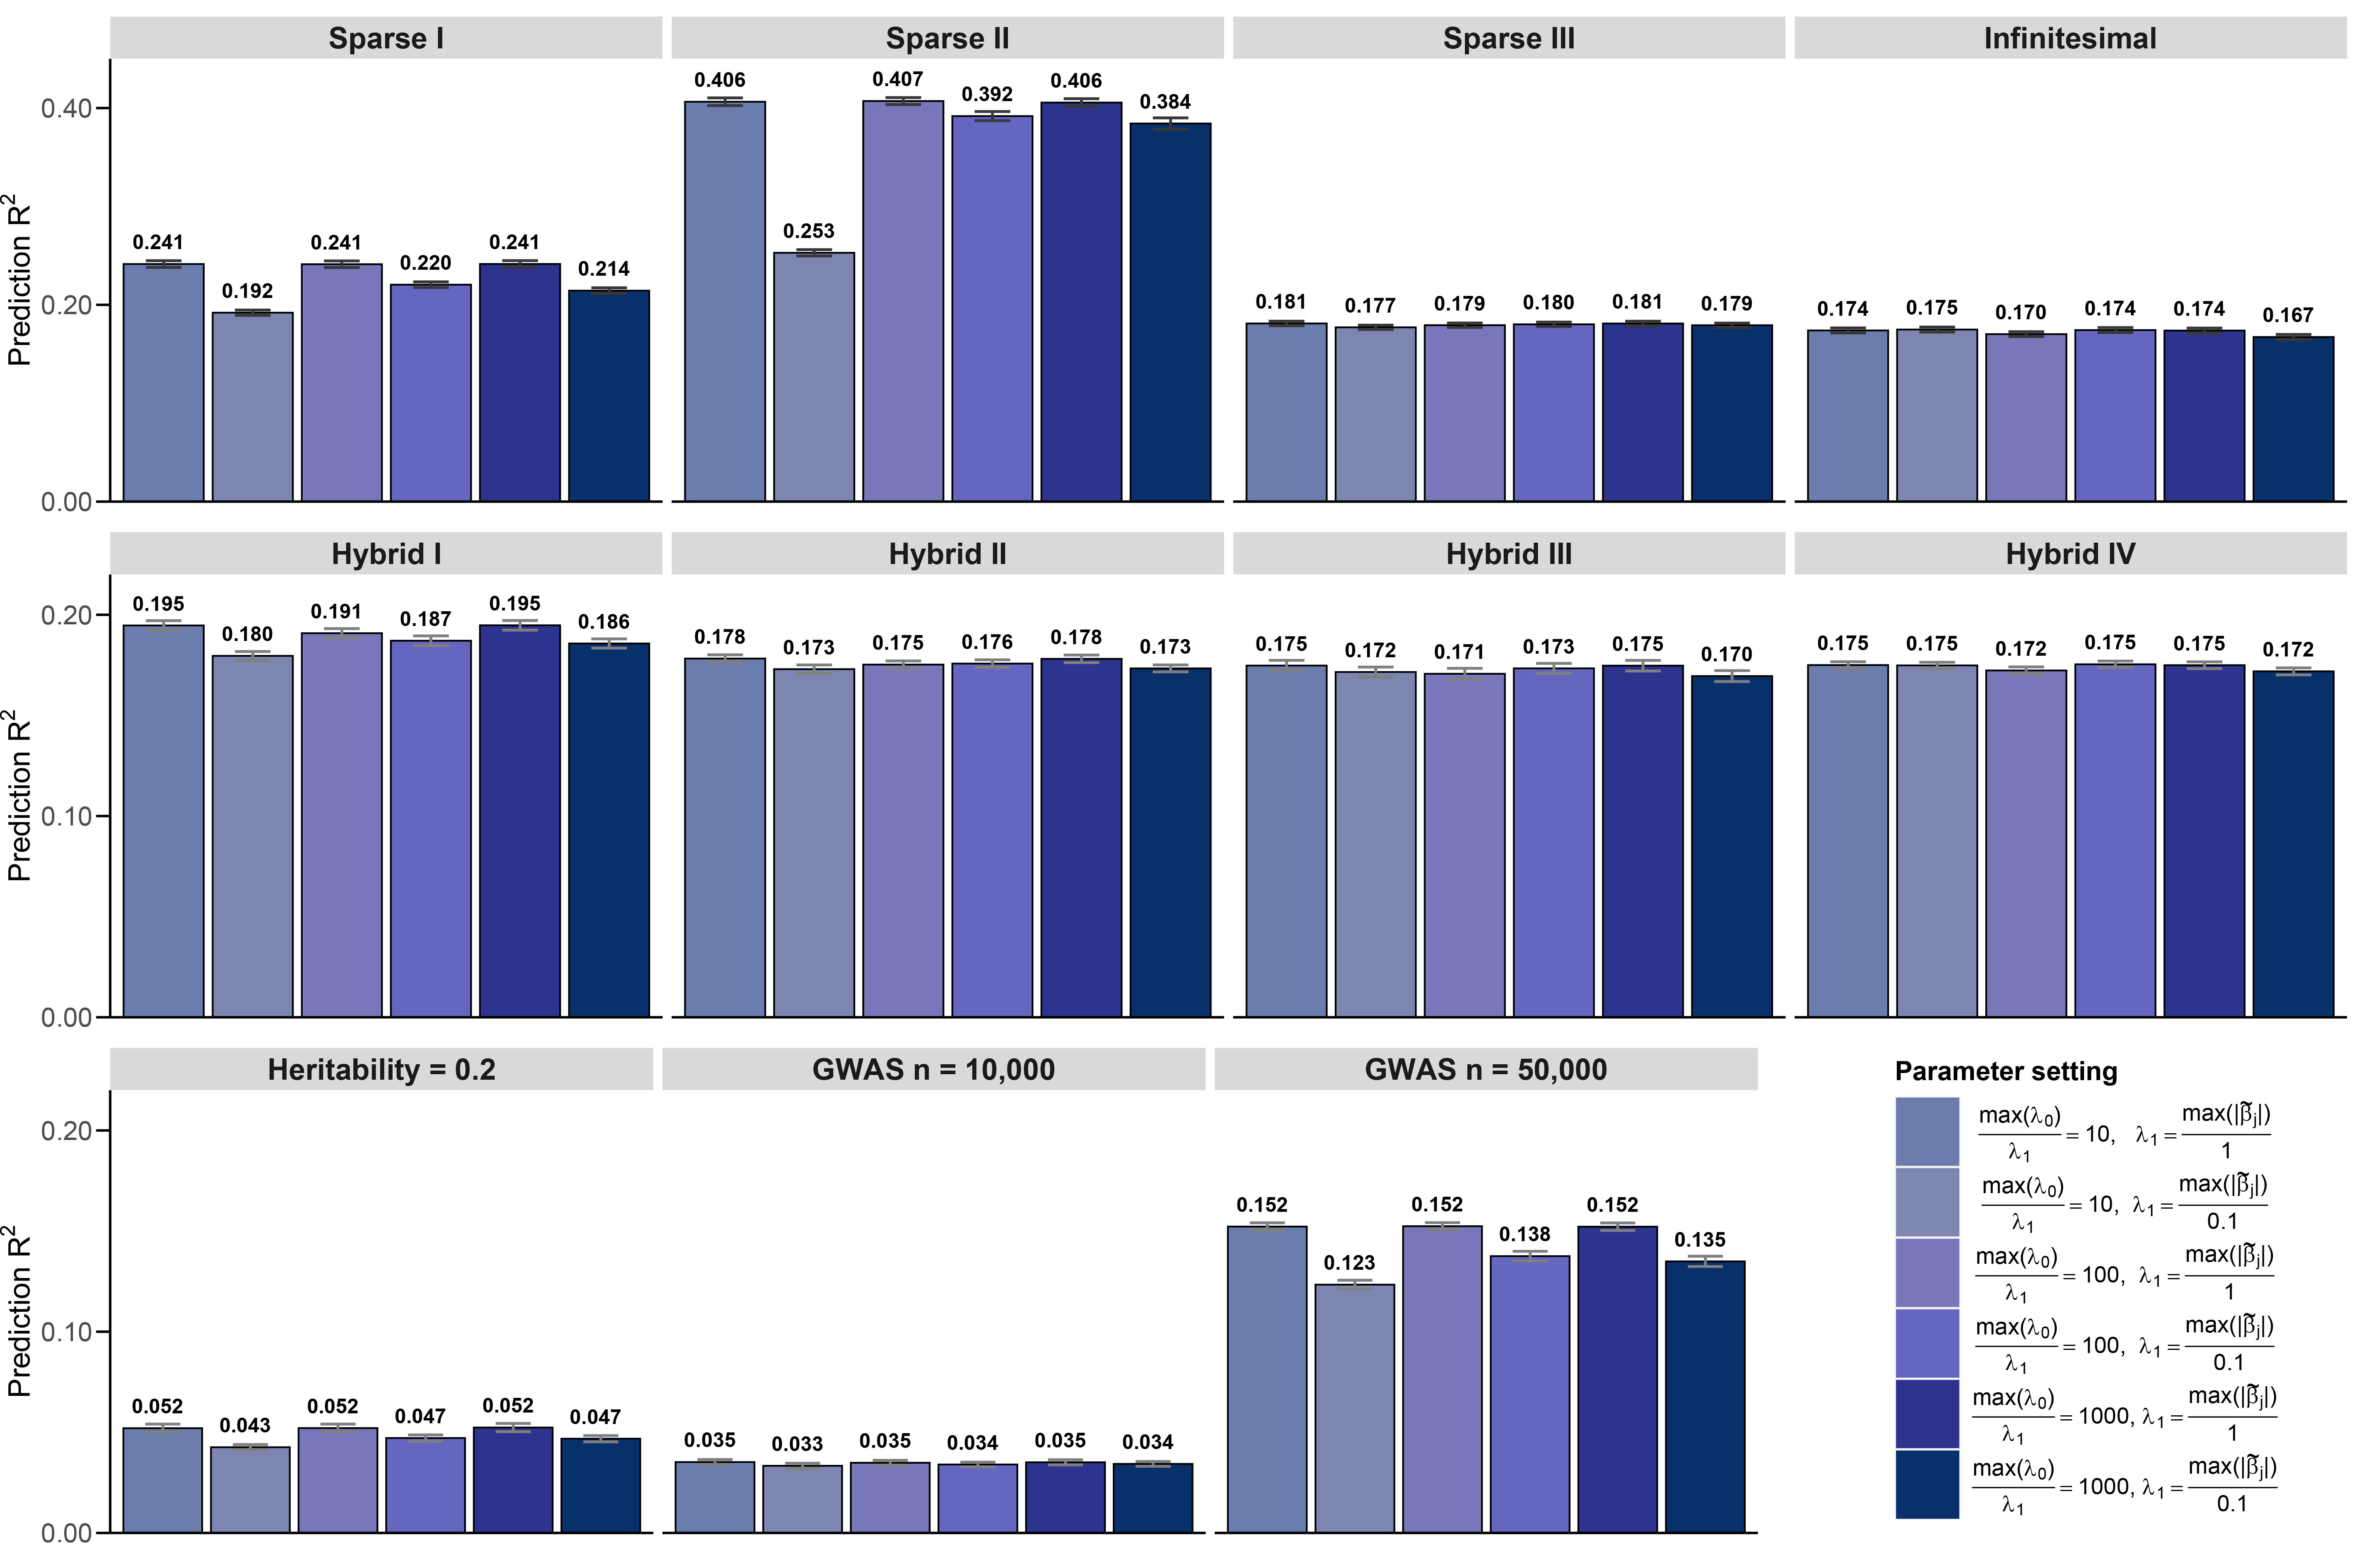


**Figure S2. Sensitivity analysis of and selection in single-ancestry simulations.** Performance of SSL (measured by *R*²) was evaluated across combinations of with and searched over 10 values evenly spaced from to , with , while was fixed at 0.1. The results demonstrated robust performance across all tested combinations. Based on these findings, the recommended tuning parameters (deep purple) were set as = (*i.e.*, ) and as a sequence of 10 values evenly spaced from to (*i.e.*, ). denotes the pseudocorrelation estimate of the marginal SNP effect from GWAS summary statistics.

**
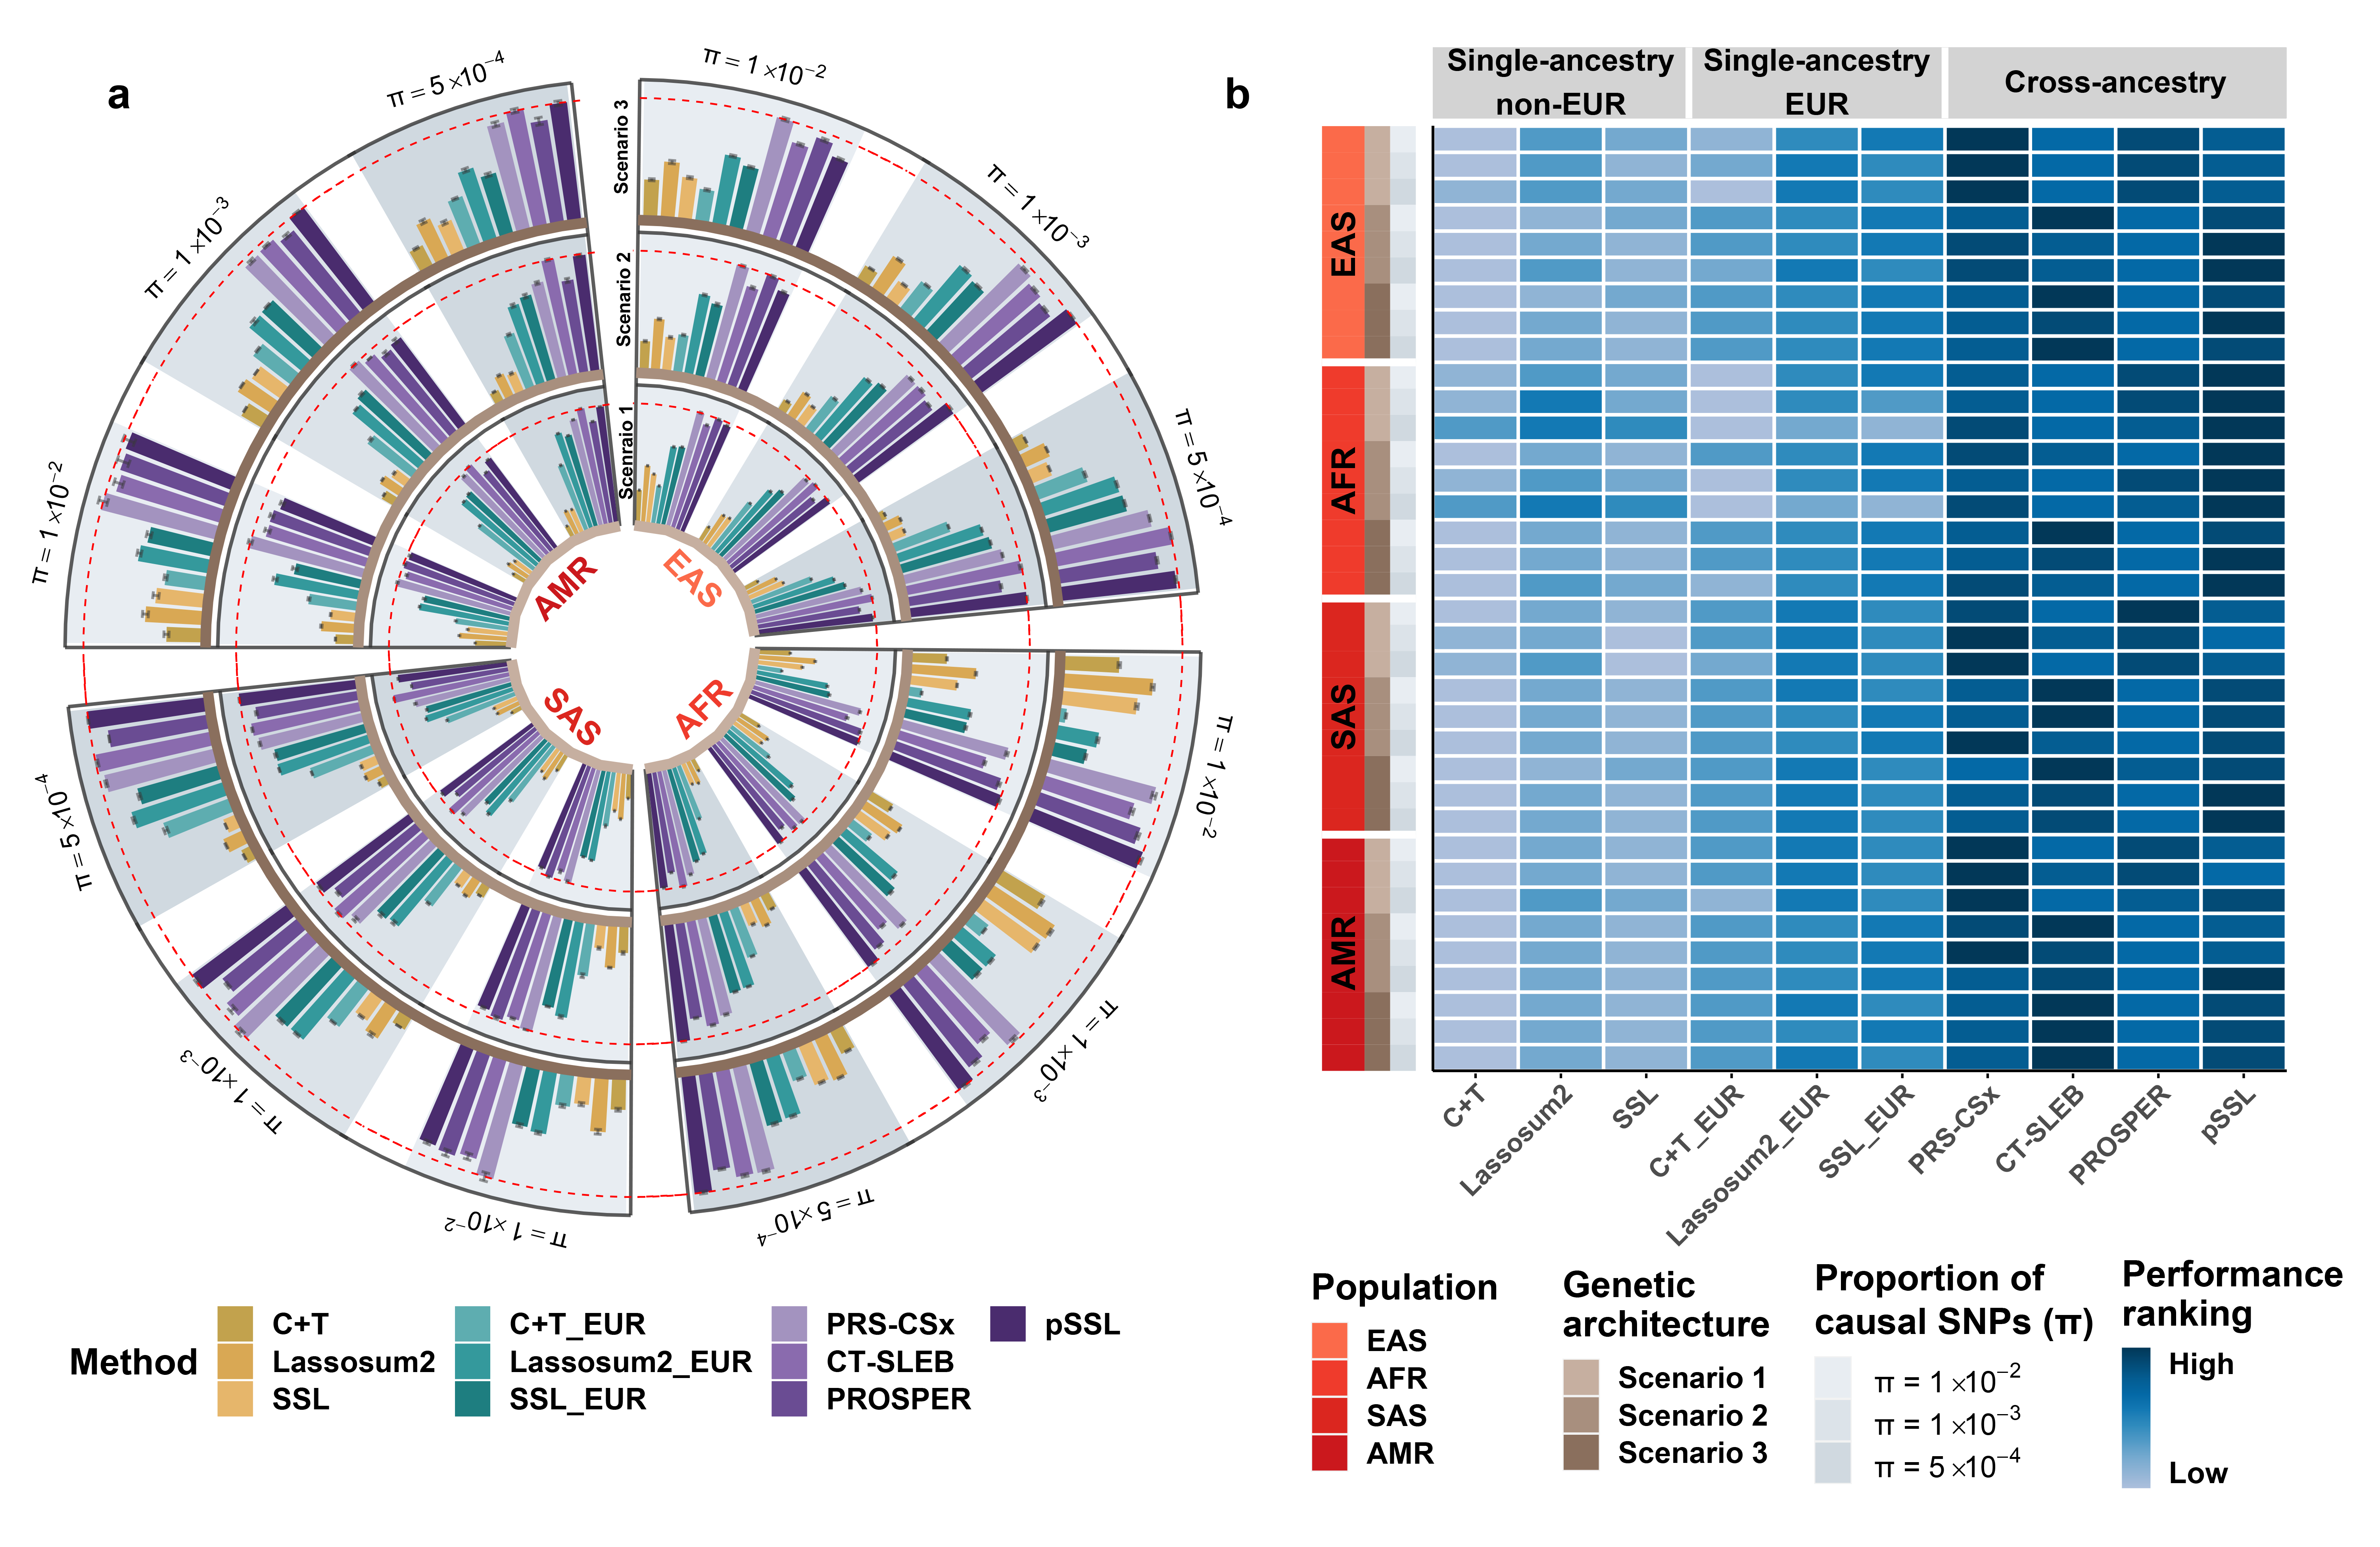
**

**Figure S3. Performance of cross-ancestry PGS methods in simulations with a target population GWAS sample size of 15,000. a**, Predictive accuracy of PGS methods across simulation scenarios. Texts in the outer and inner circle indicate the proportion of causal SNPs and the target population, respectively. Three concentric circles correspond to three scenarios of genetic architecture. *R*² values are normalized to the maximum value (100%, red dash line) within each scenario. Error bars indicate standard error (SE) of *R*² across 10 replicates. **b**, Performance ranking of PGS methods. Color indicates ranking of each method (x-axis) within each scenario (y-axis), where darker color indicates better performance.


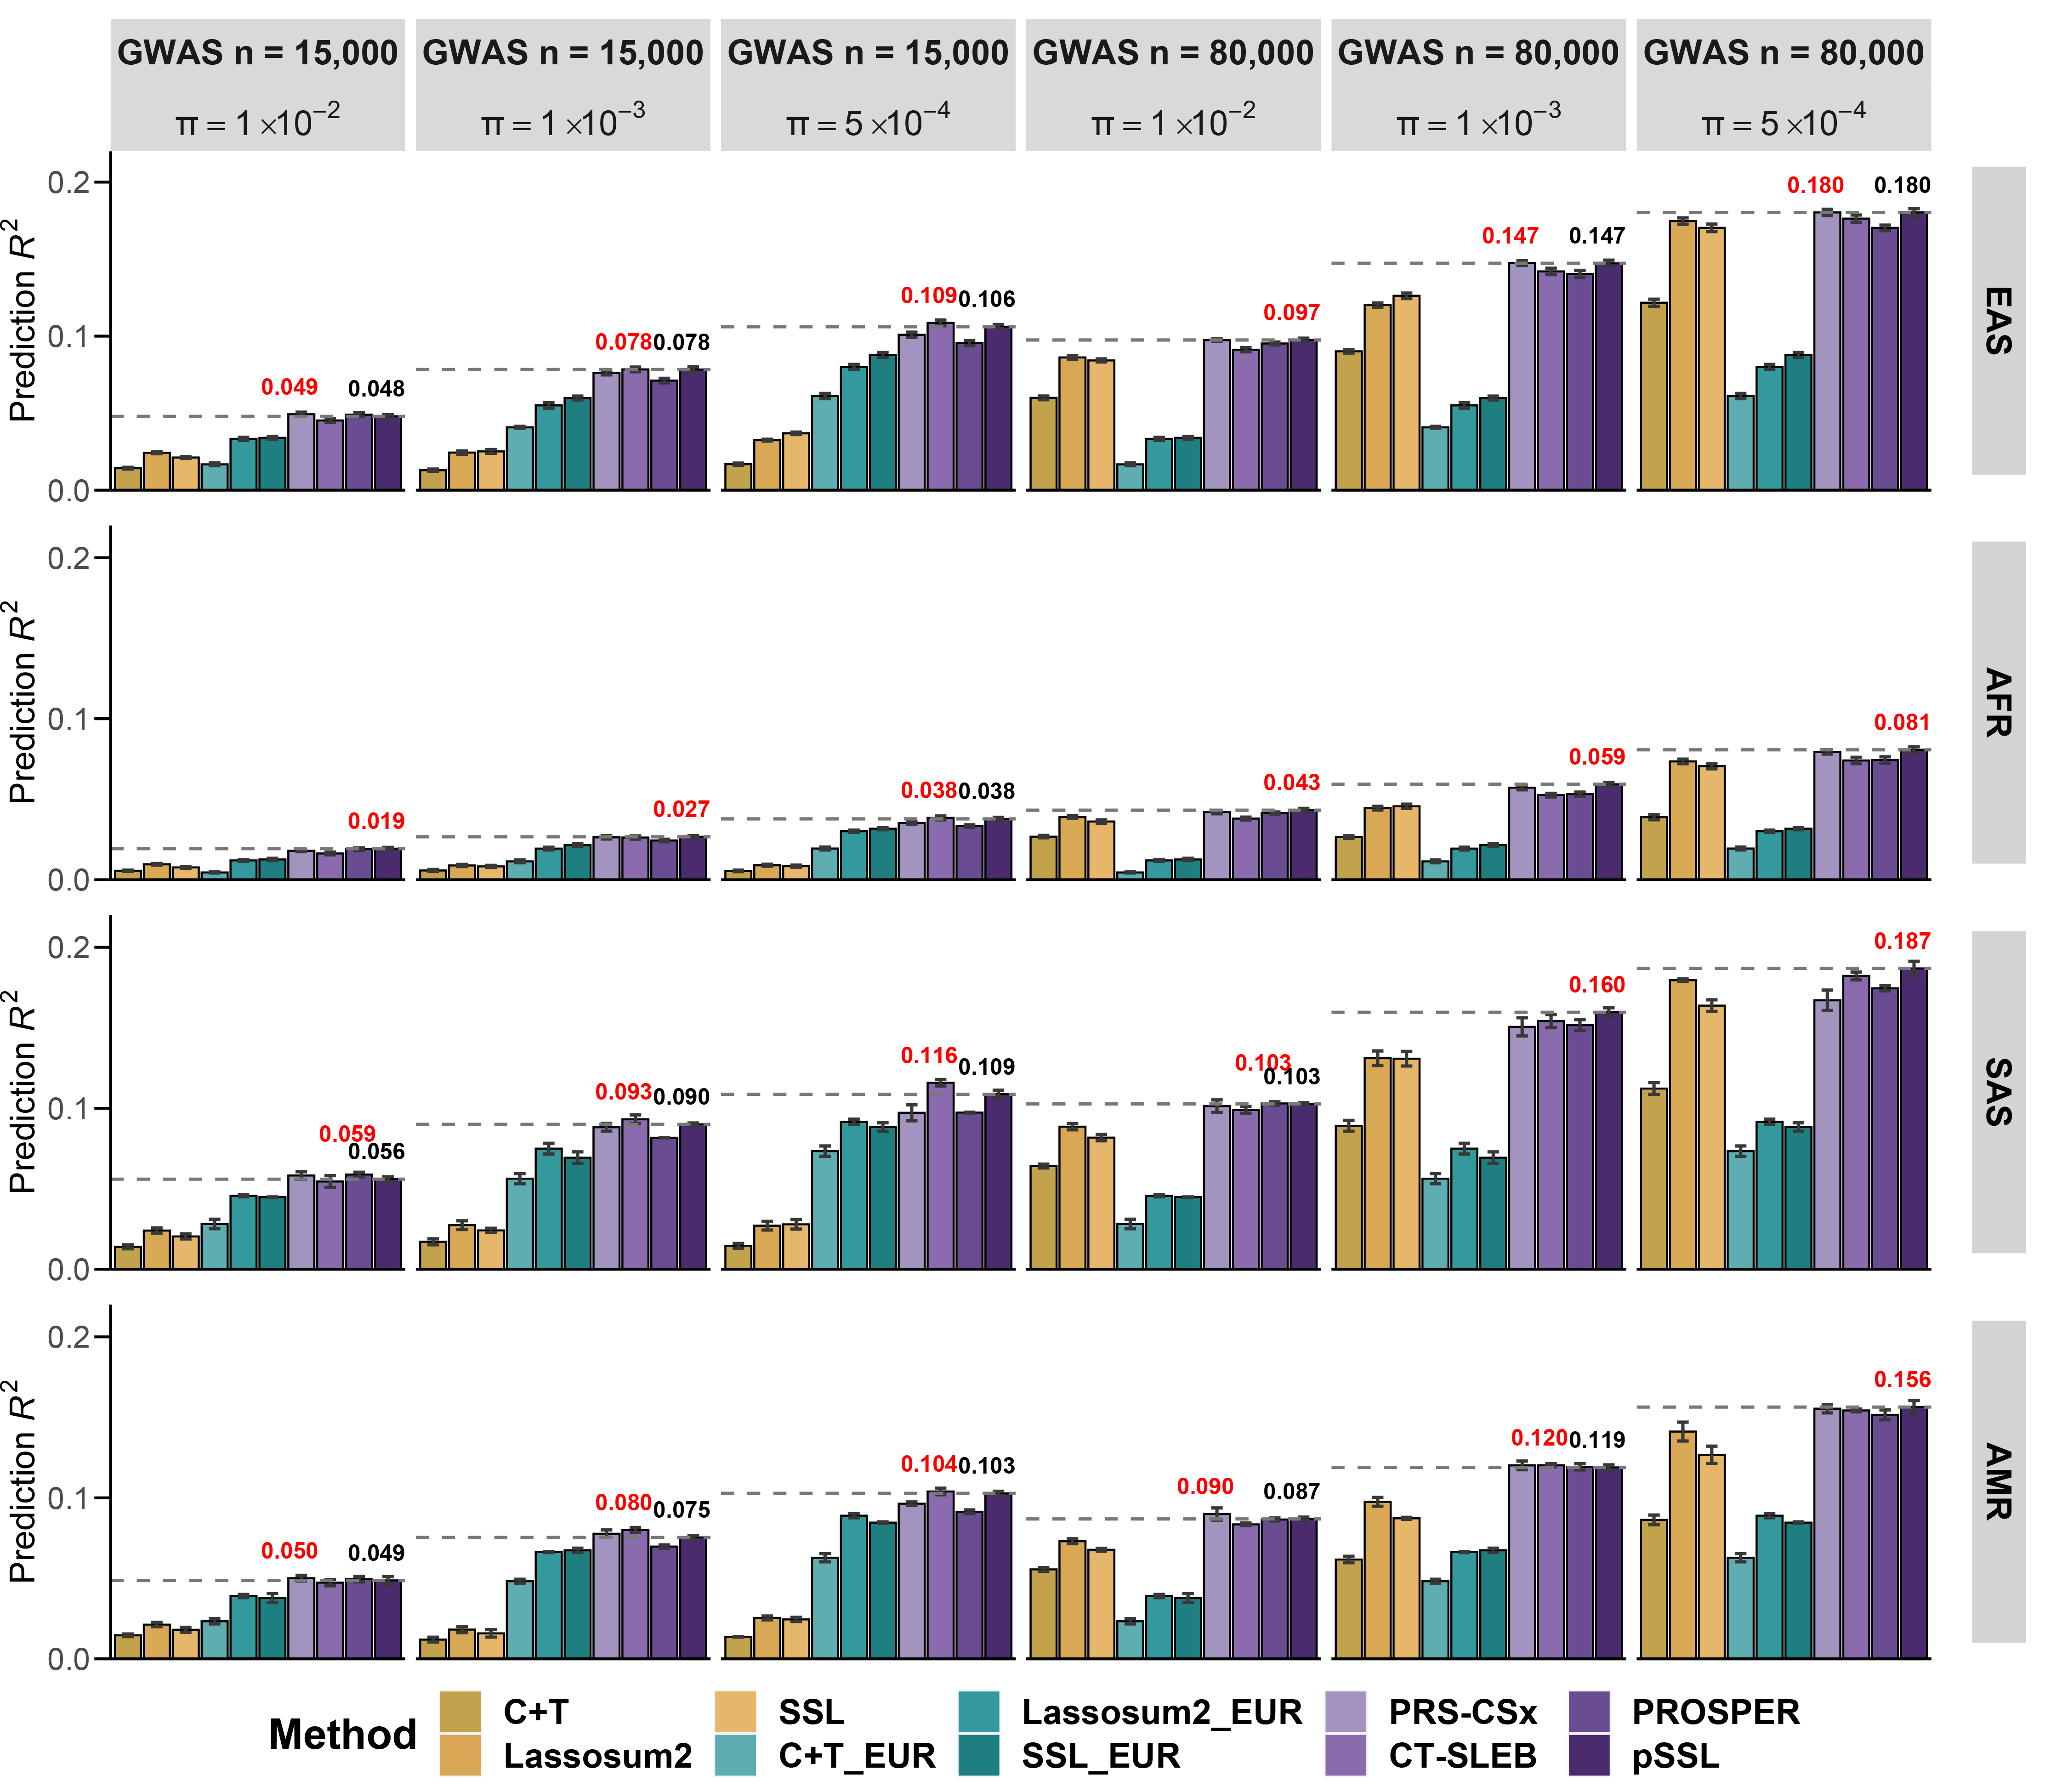


**Figure S4. Performance of cross-ancestry PGS methods in simulations with constant genome-wide heritability, and cross-ancestry genetic correlation (scenario I).** The gray dashed line represents the performance of SSL method and a red numeric label means the top-performing method.

**
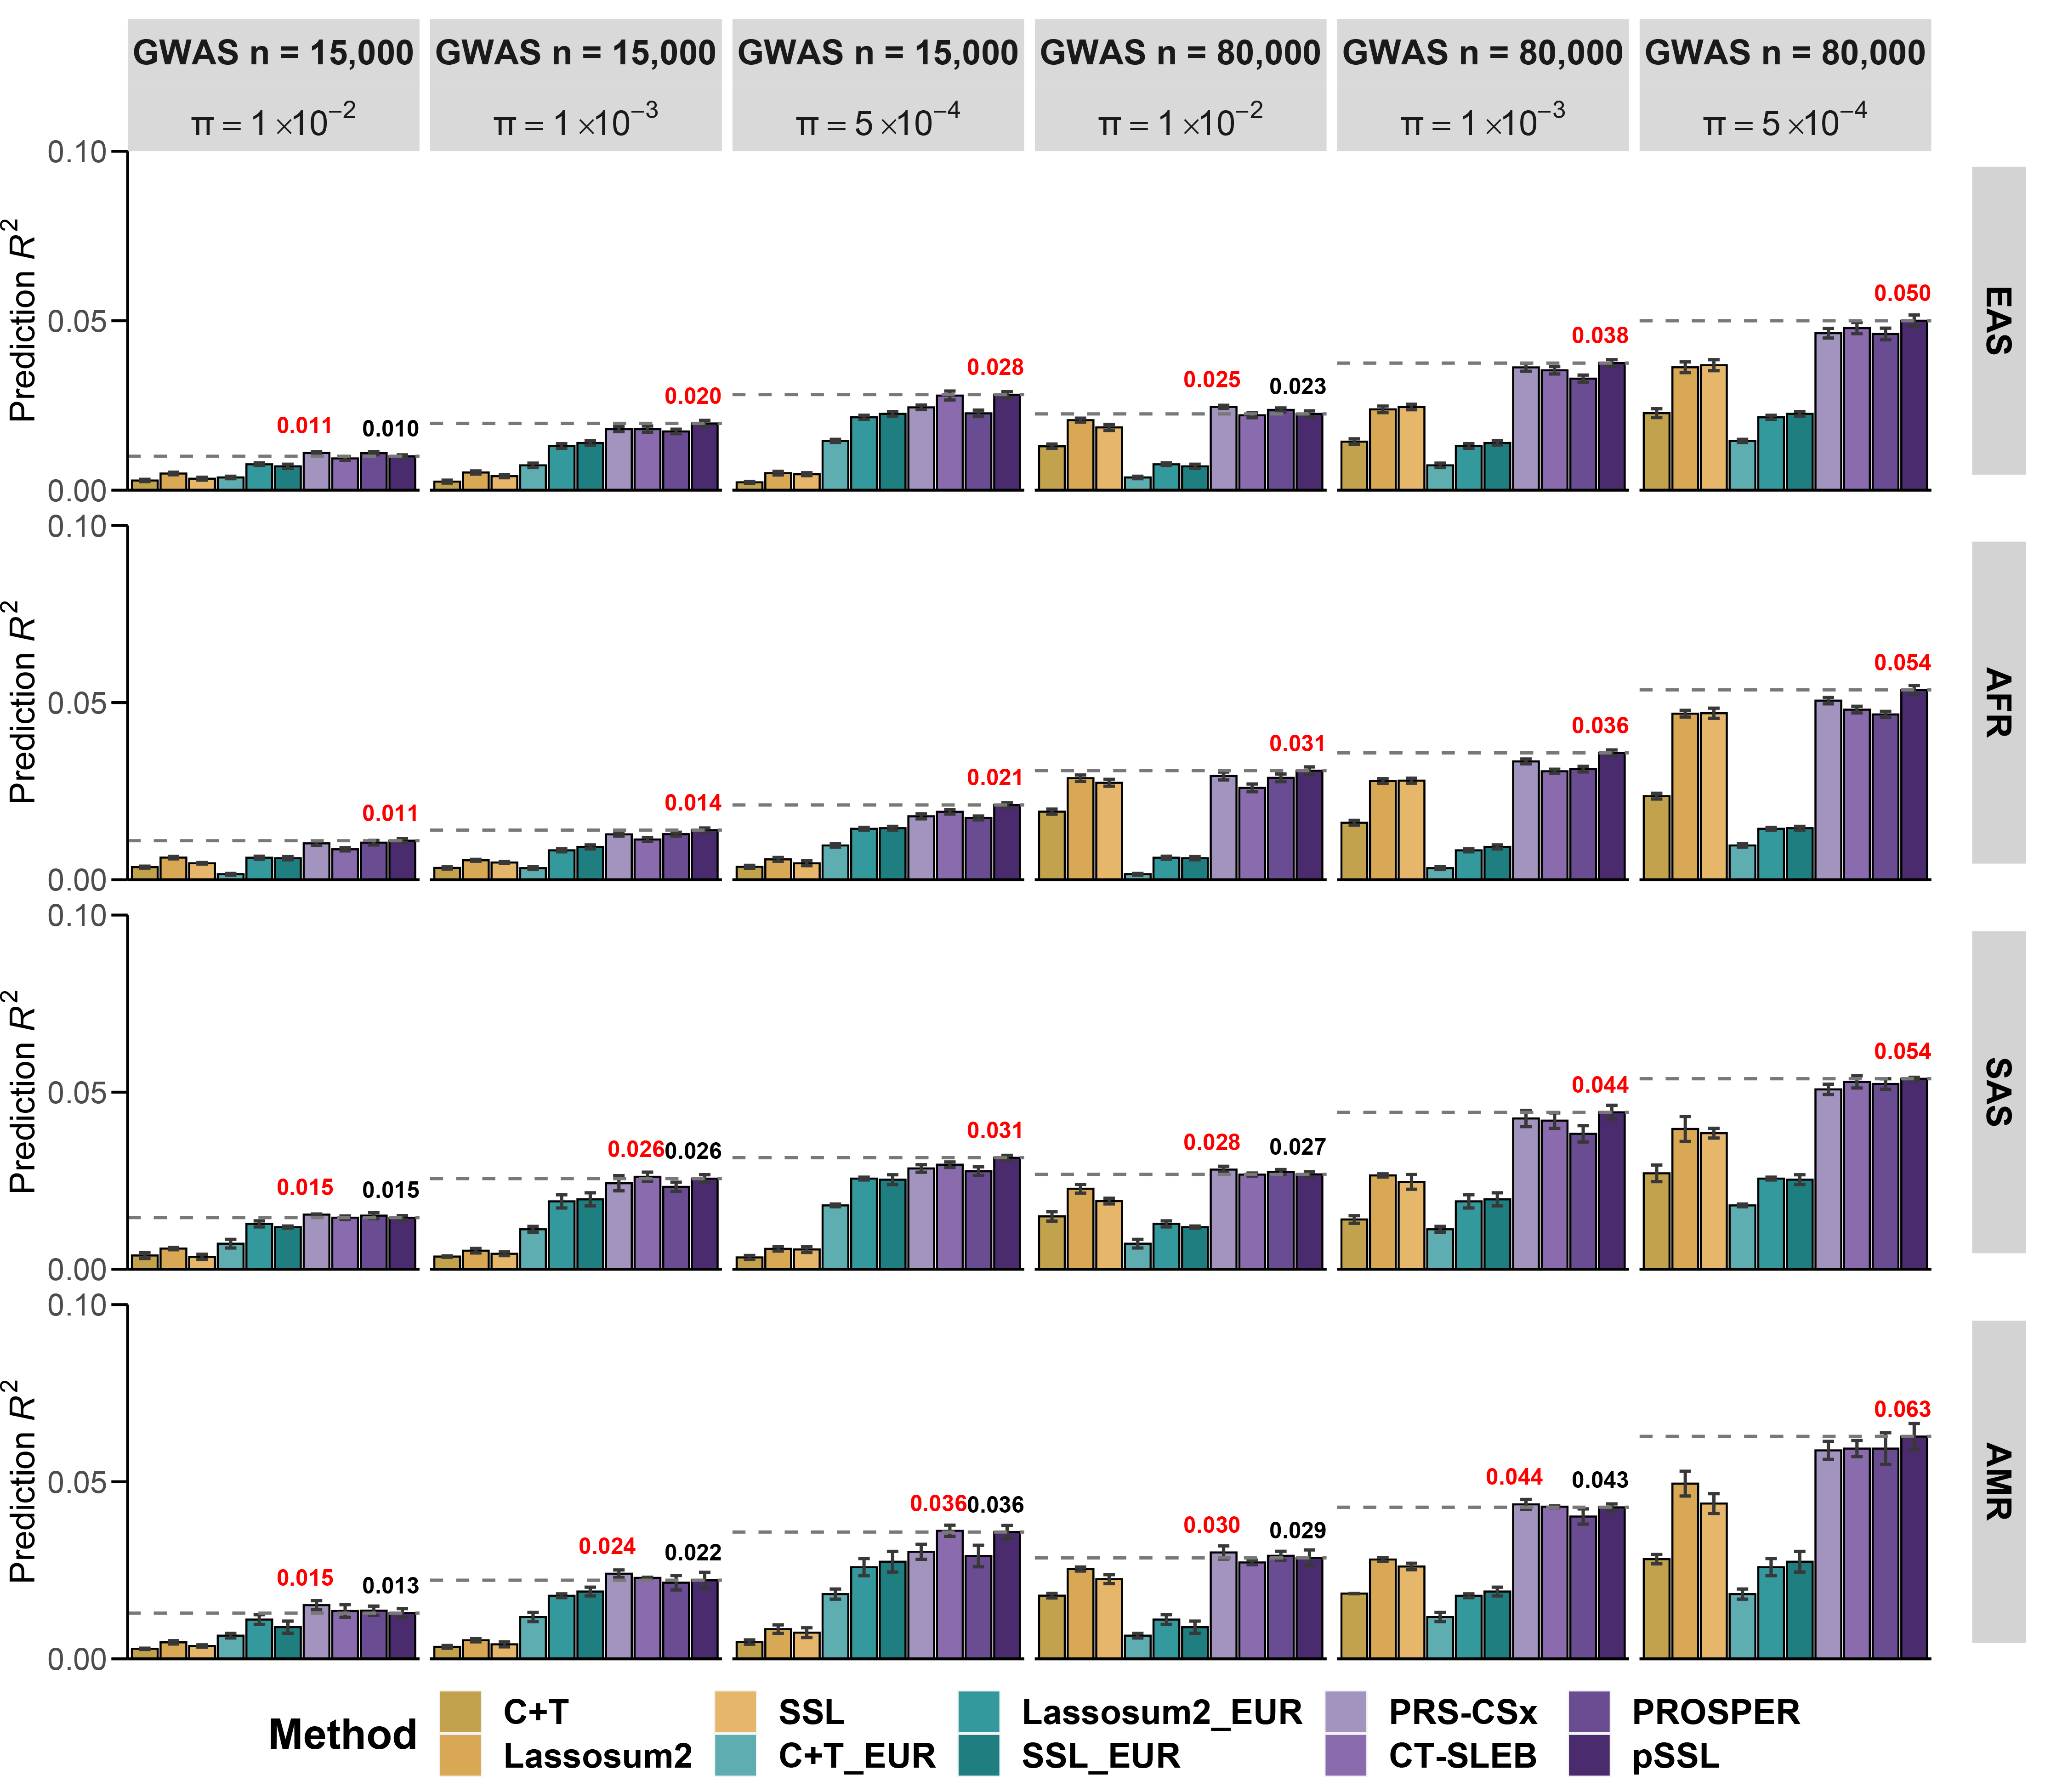
**

**Figure S5. Performance of cross-ancestry PGS methods in simulations with constant per-SNP heritability, and cross-ancestry genetic correlation** . **(scenario II).** The gray dashed line represents the performance of SSL method and a red numeric label means the top-performing method.

**
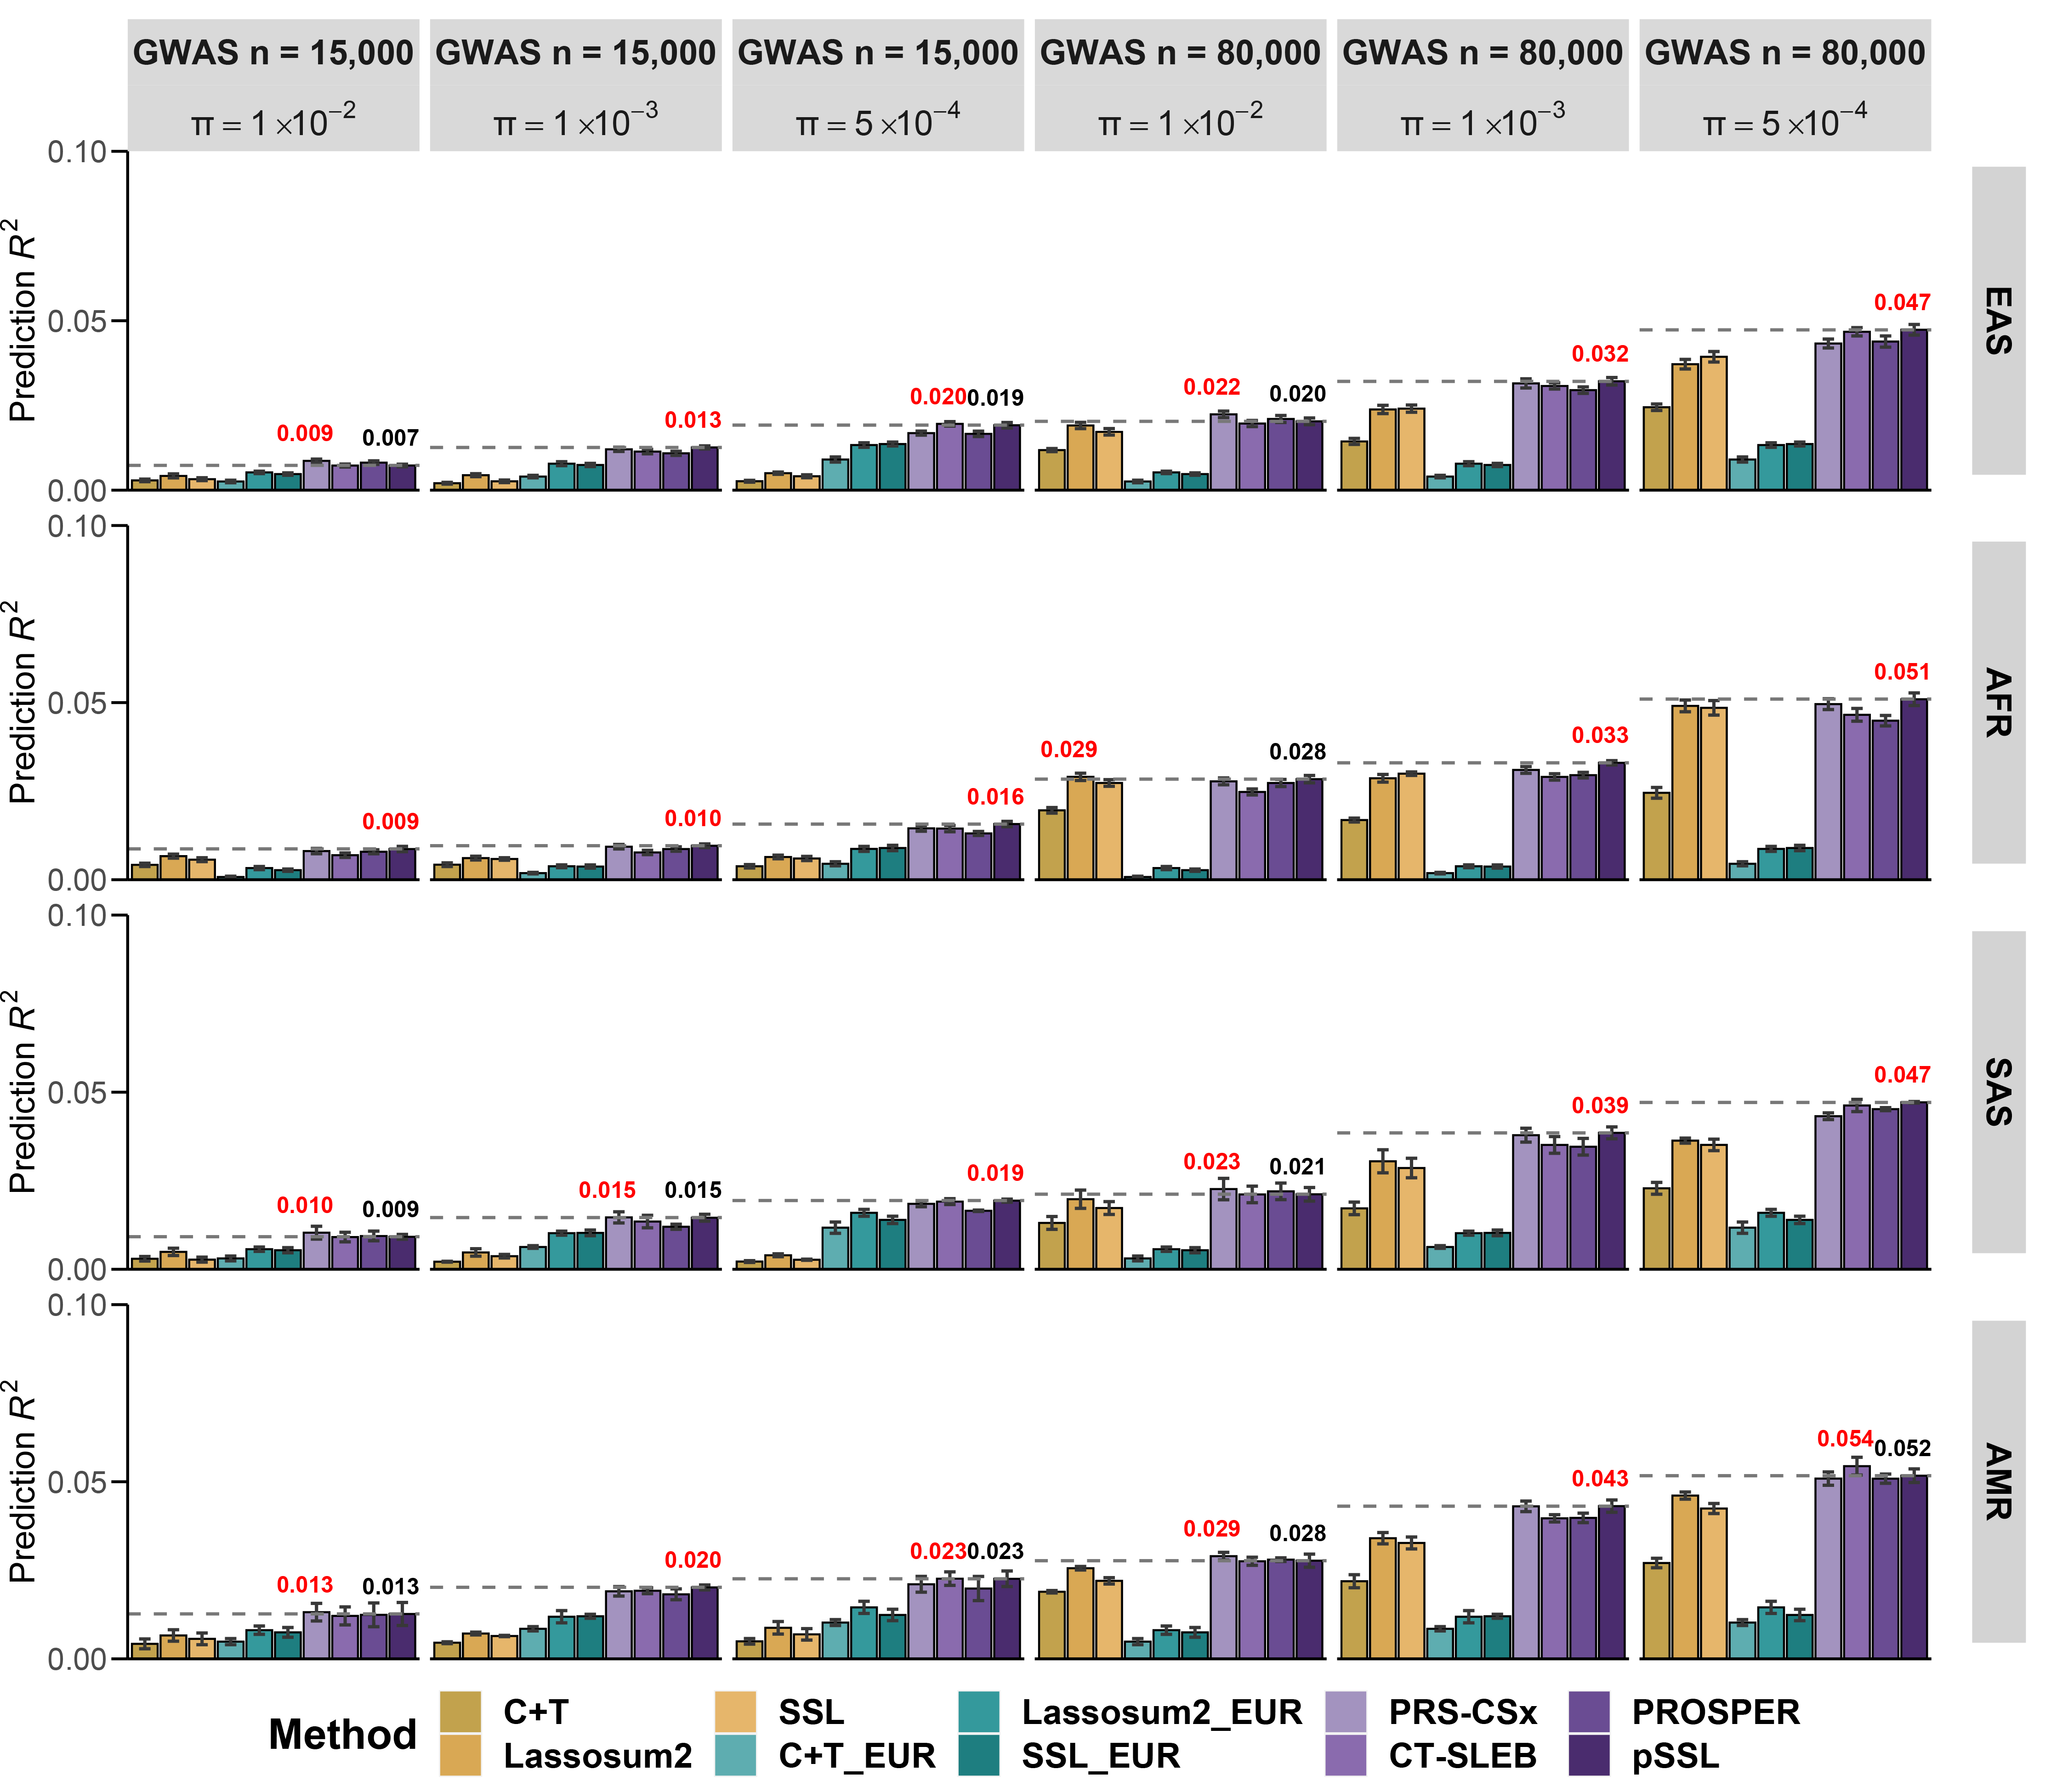
**

**Figure S6. Performance of cross-ancestry PGS methods in simulations with constant per-SNP heritability, and cross-ancestry genetic correlation** . **(scenario III).** The gray dashed line represents the performance of SSL method and a red numeric label means the top-performing method.


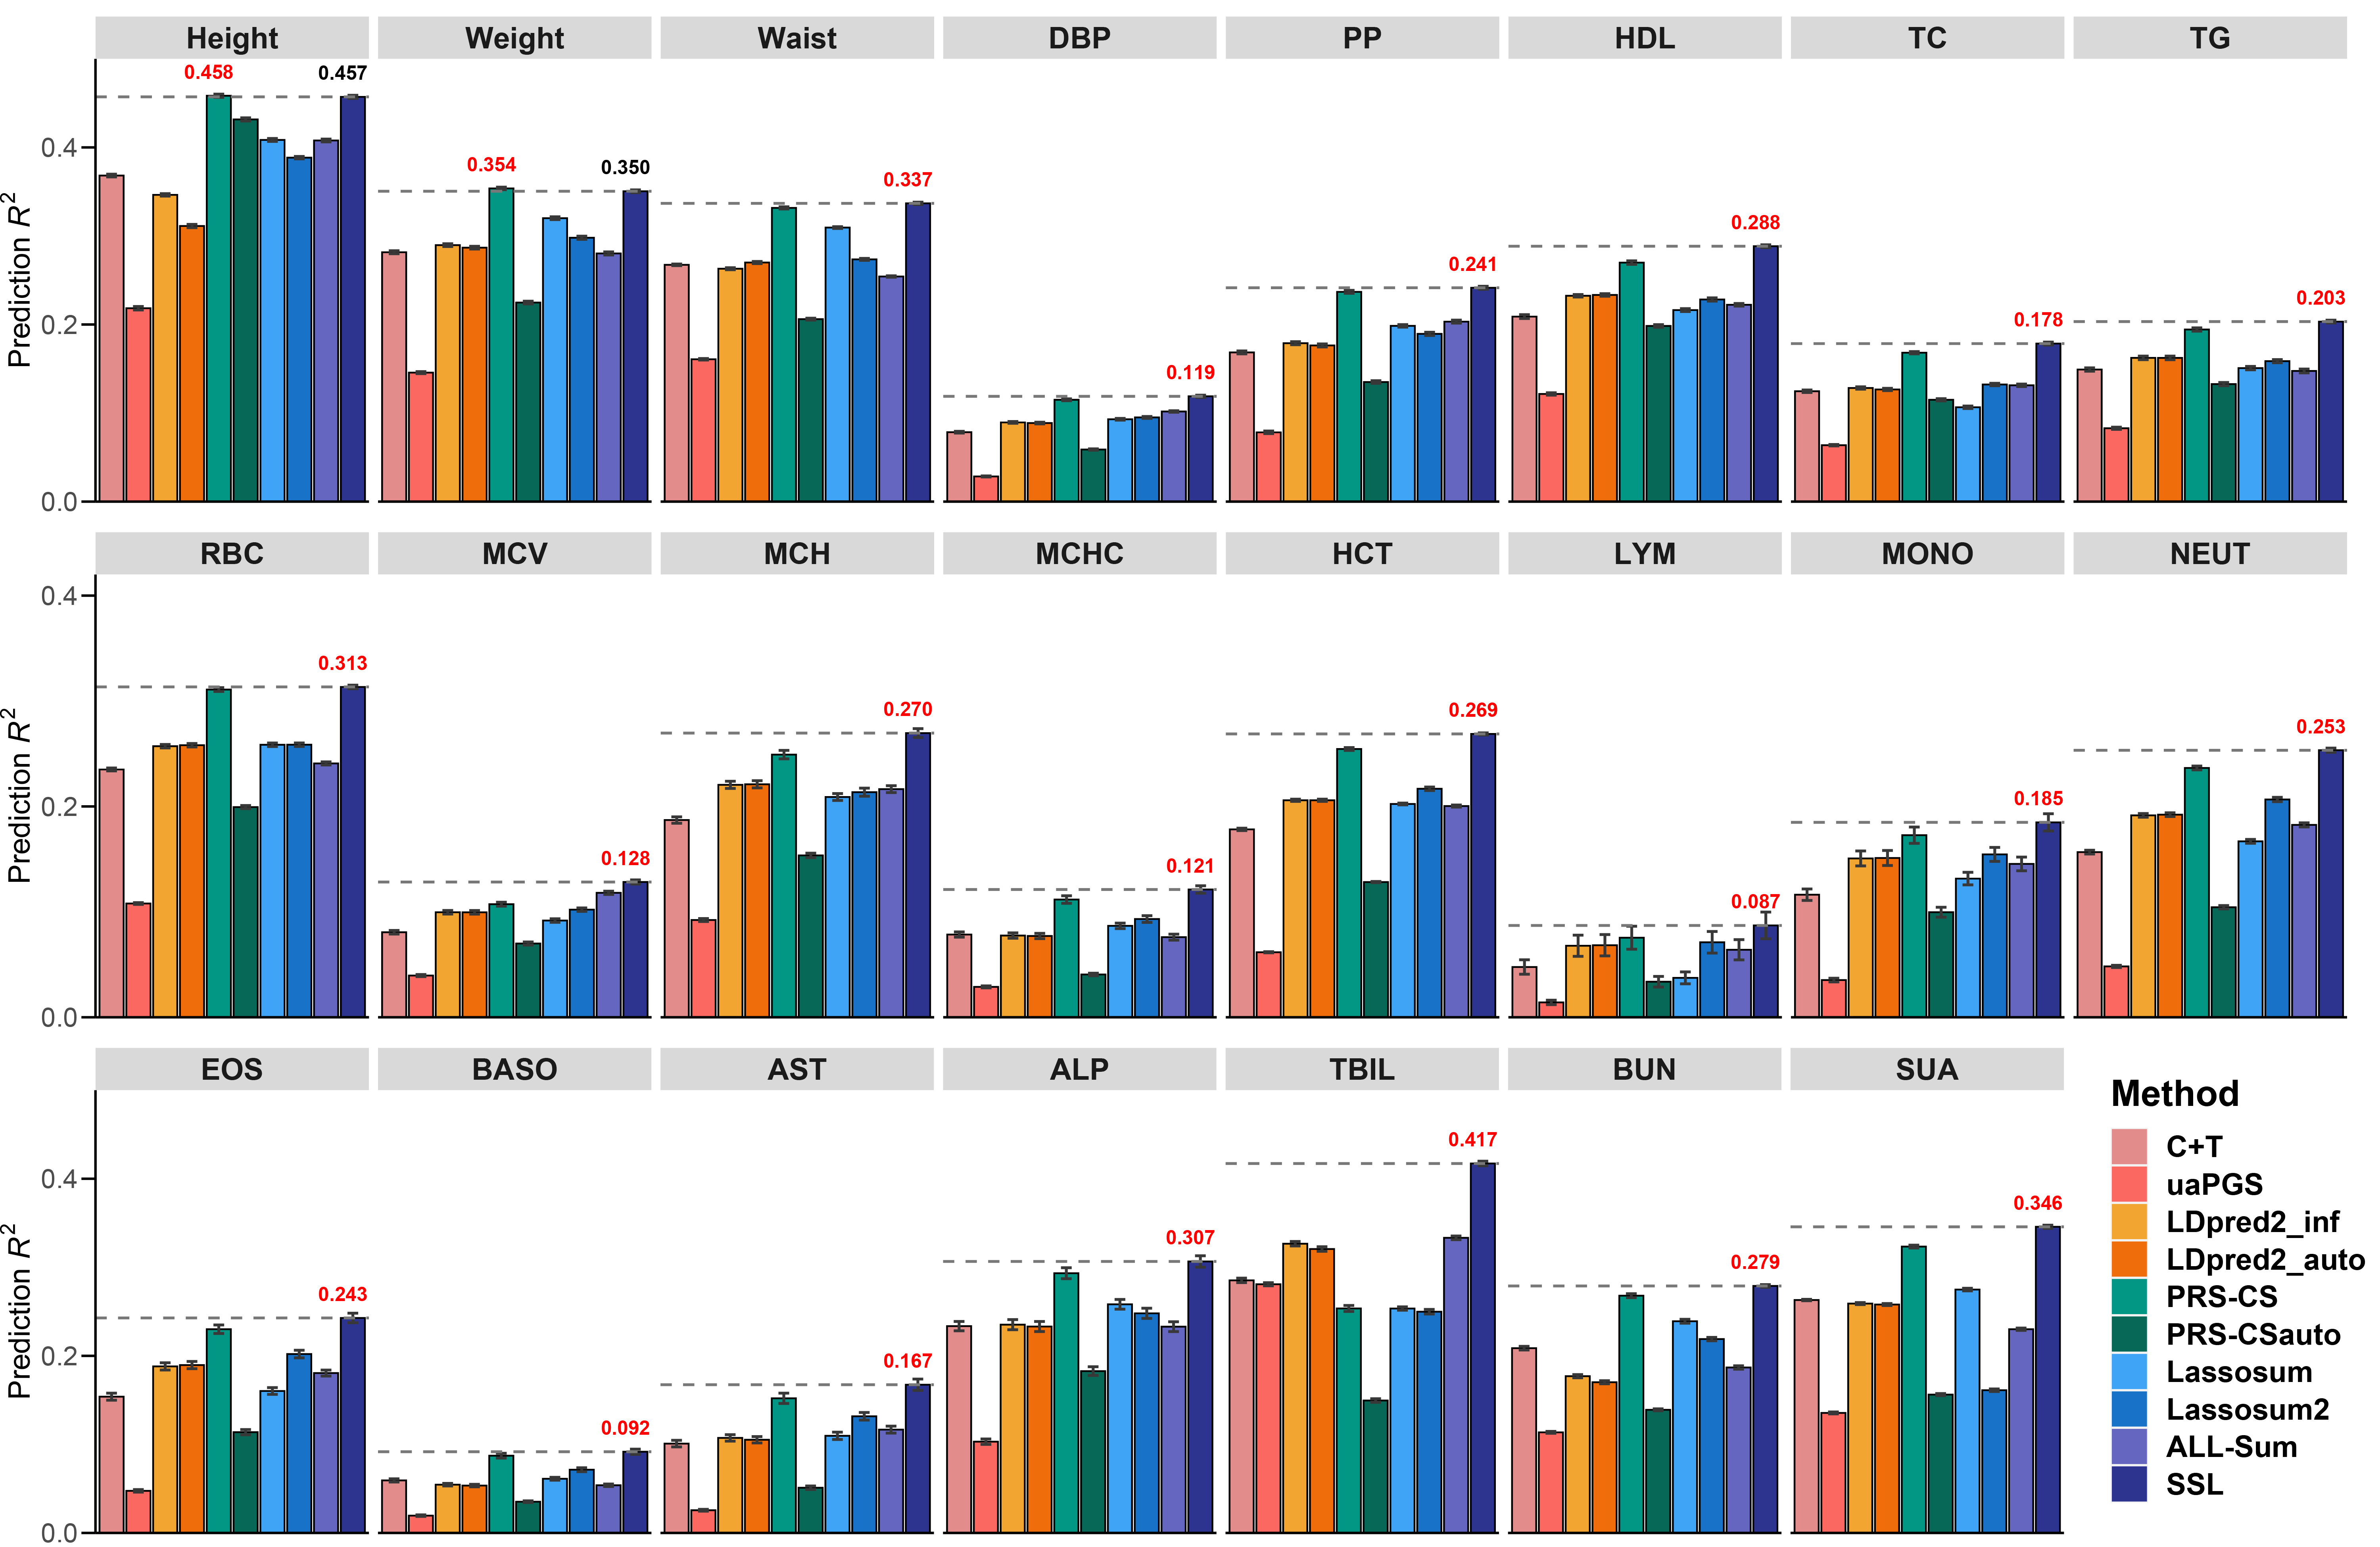


**Figure S7. Performance of single-ancestry PGS methods for other 23 complex traits in UKB.** The gray dashed line represents the performance of SSL method and a red numeric label means the top-performing method.


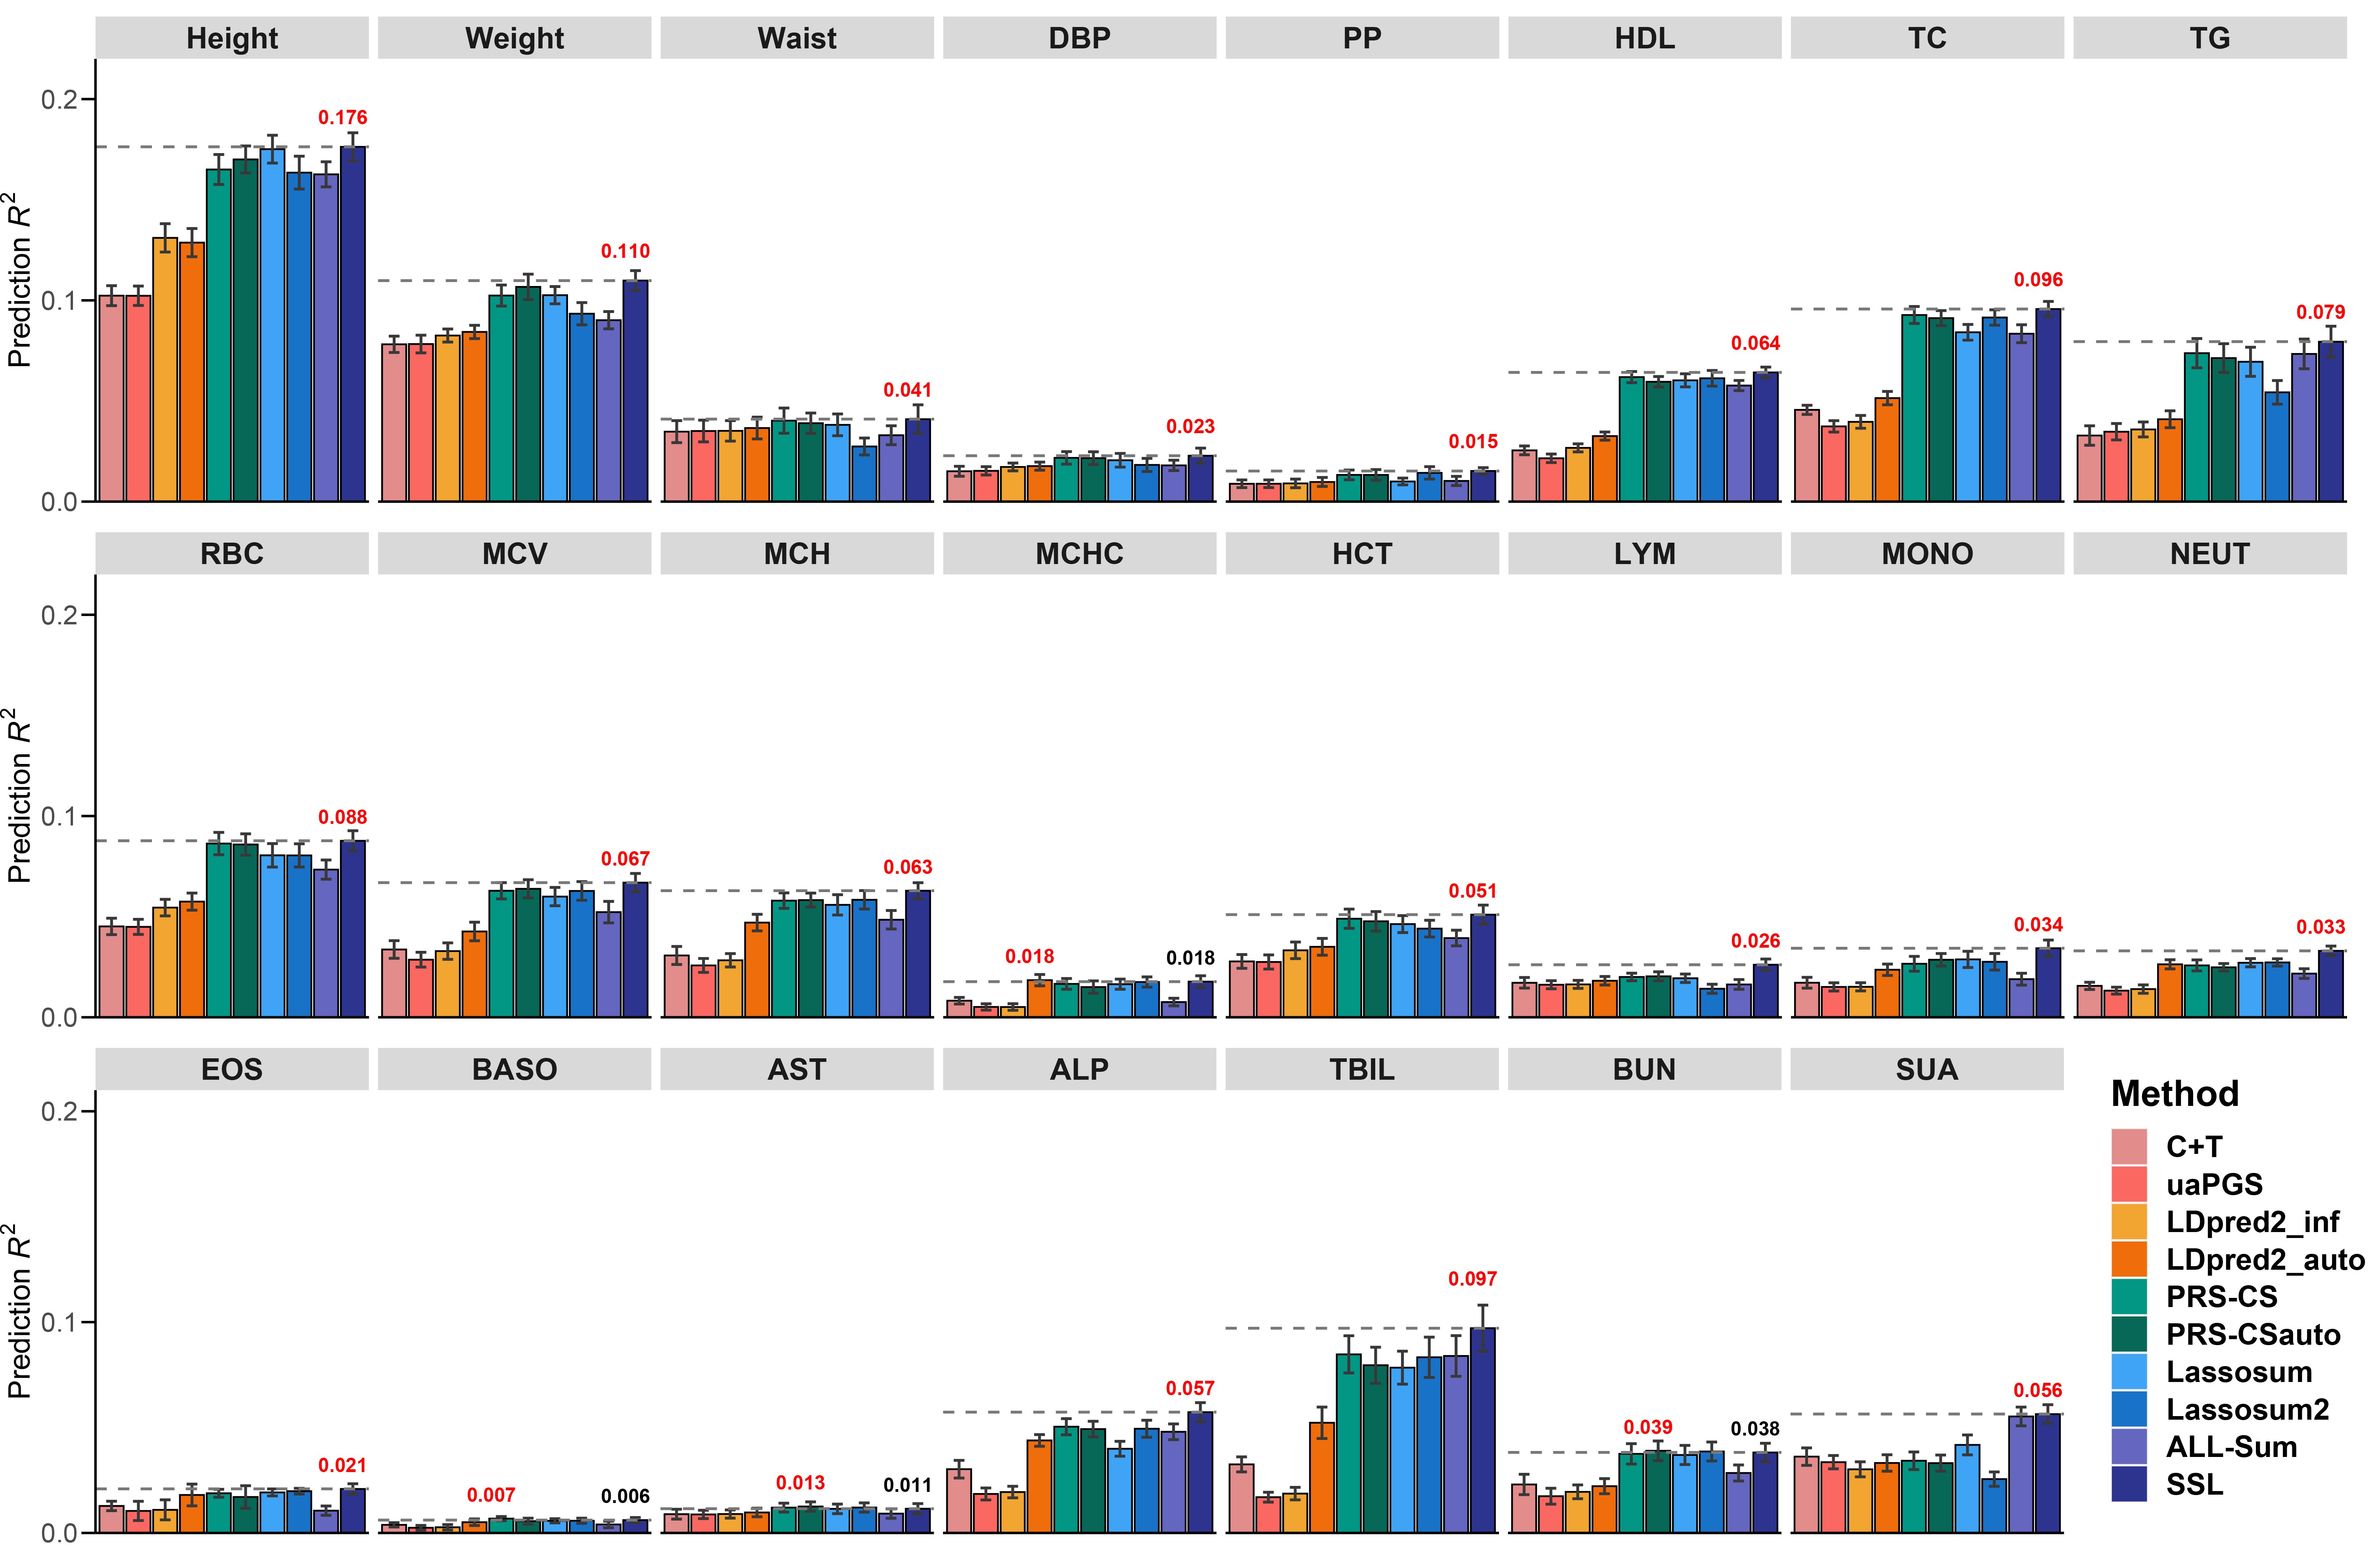


**Figure S8. Performance of single-ancestry PGS methods for other 23 complex traits in DFTJ.** The gray dashed line represents the performance of SSL method and a red numeric label means the top-performing method.

**
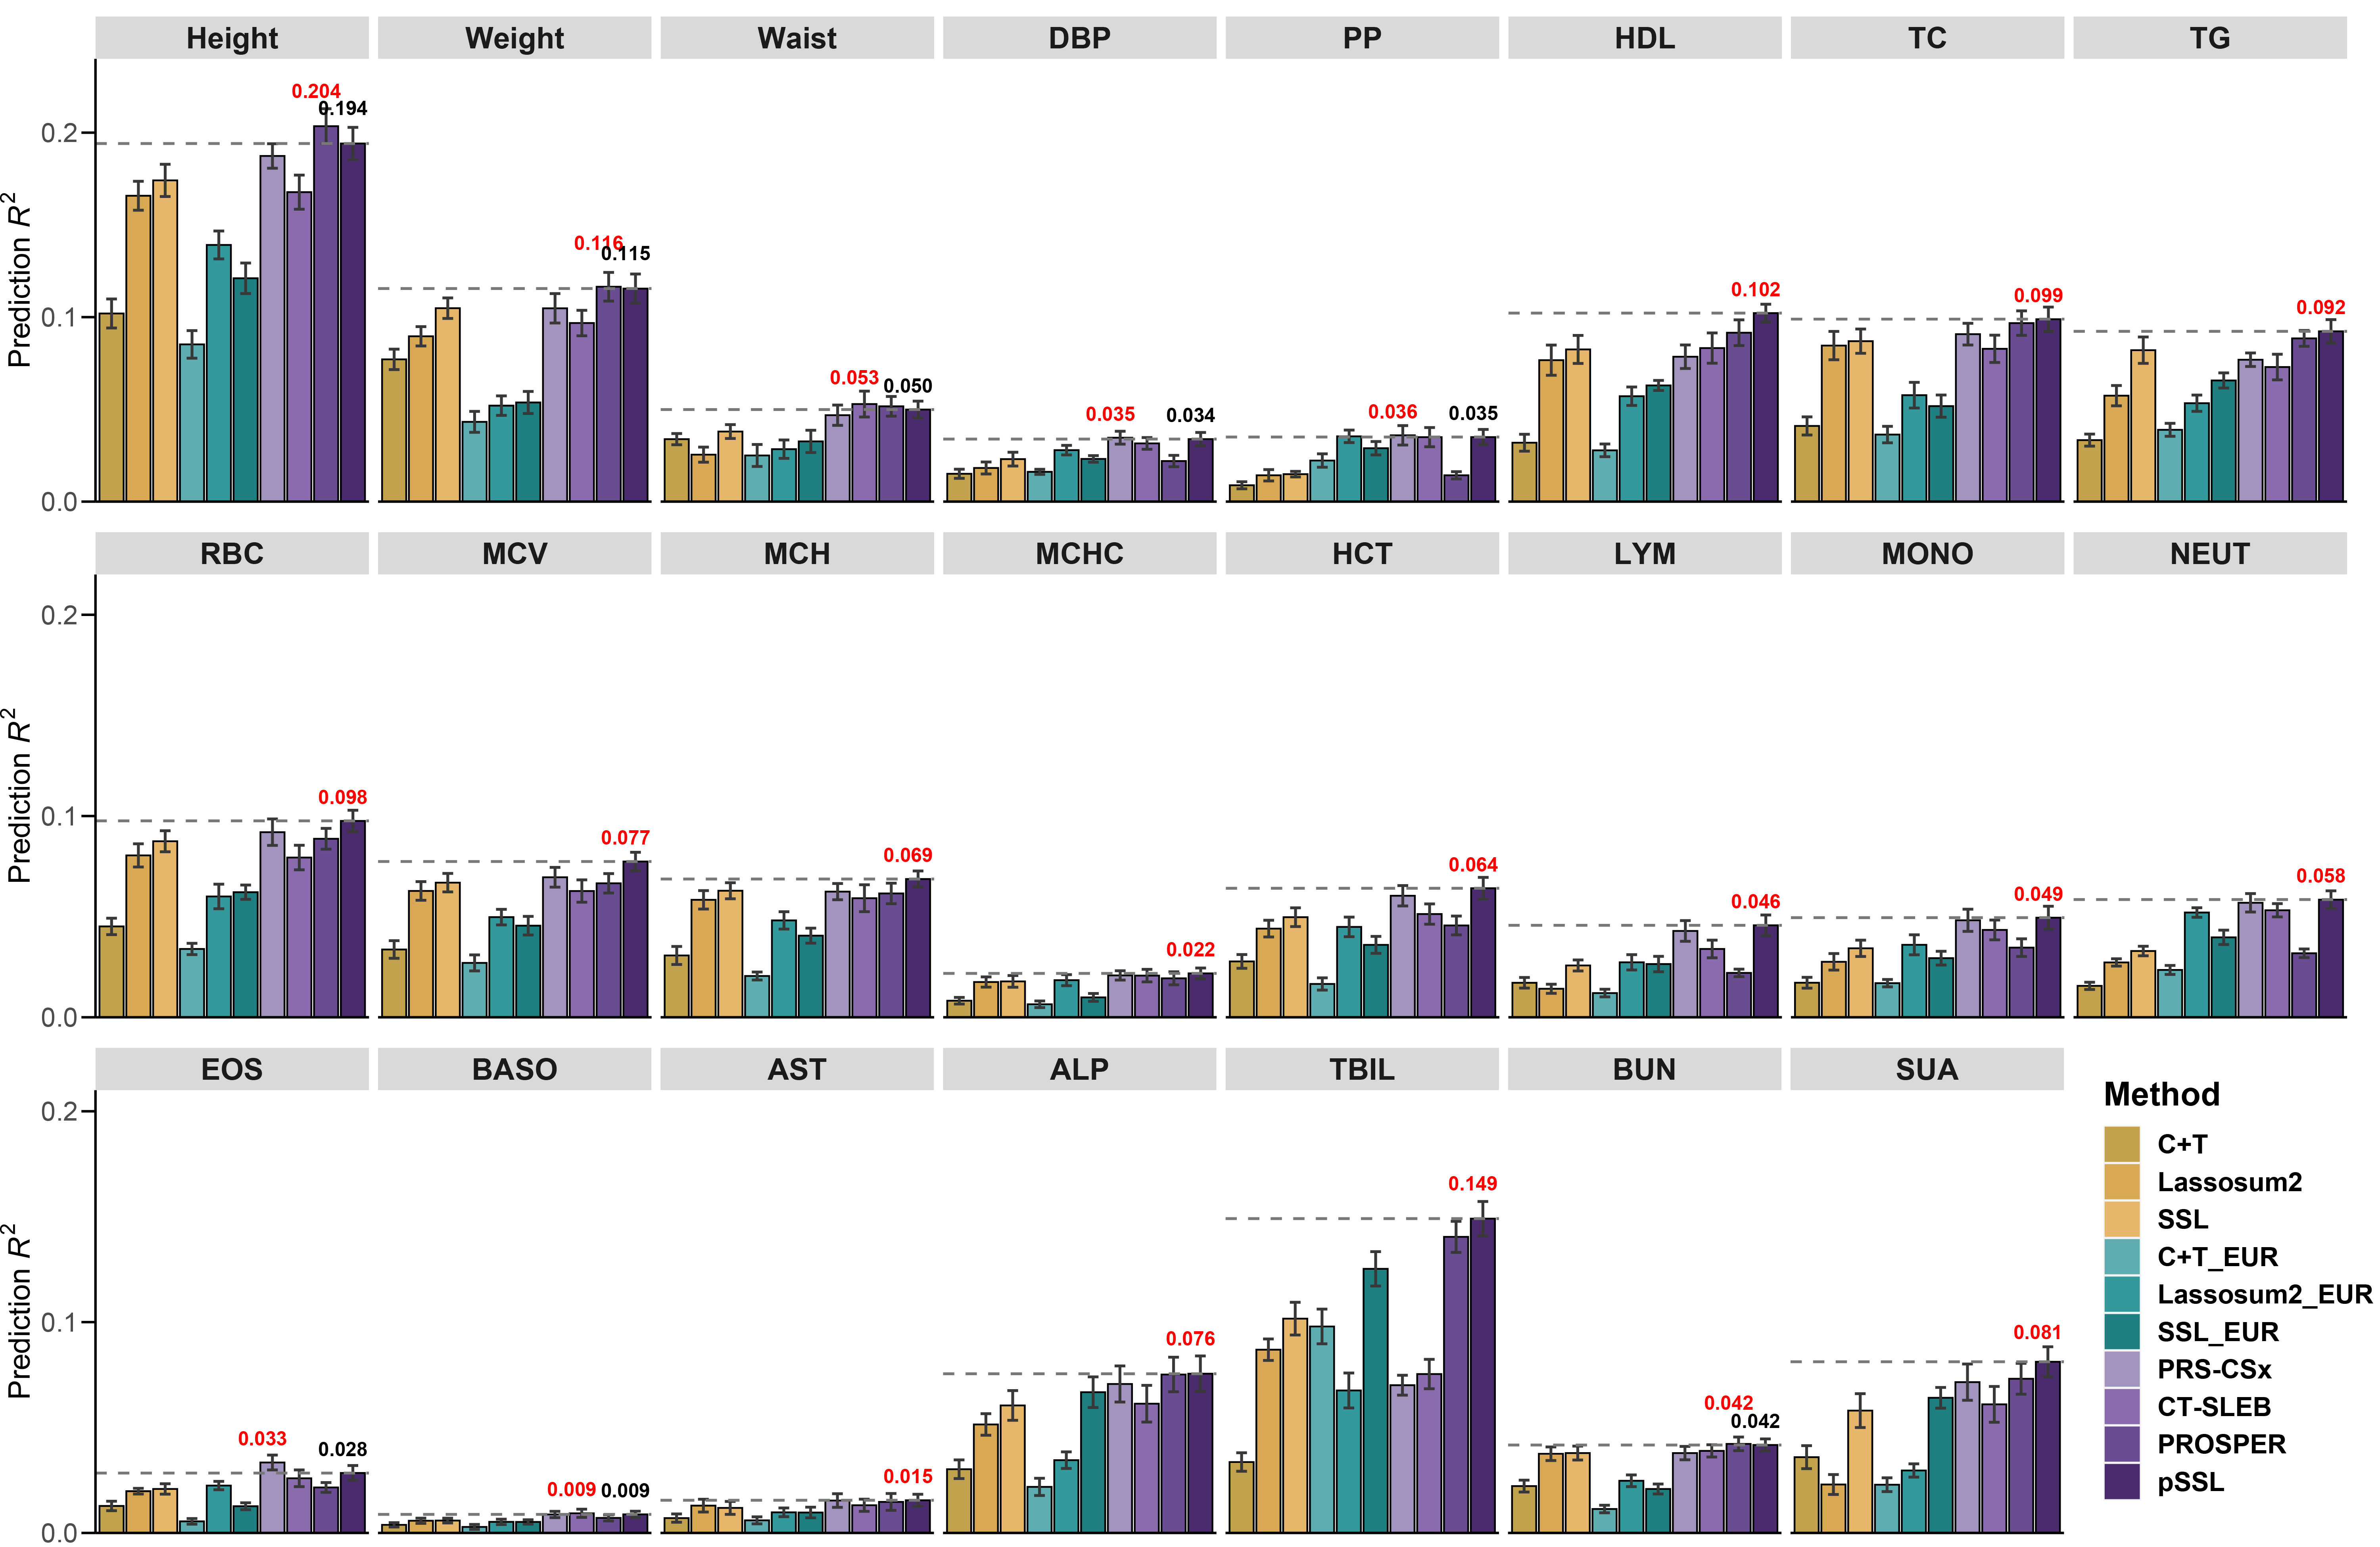
**

**Figure S9. Performance of cross-ancestry PGS methods for other 23 complex traits in DFTJ.** The gray dashed line represents the performance of pSSL method and a red numeric label means the top-performing method.


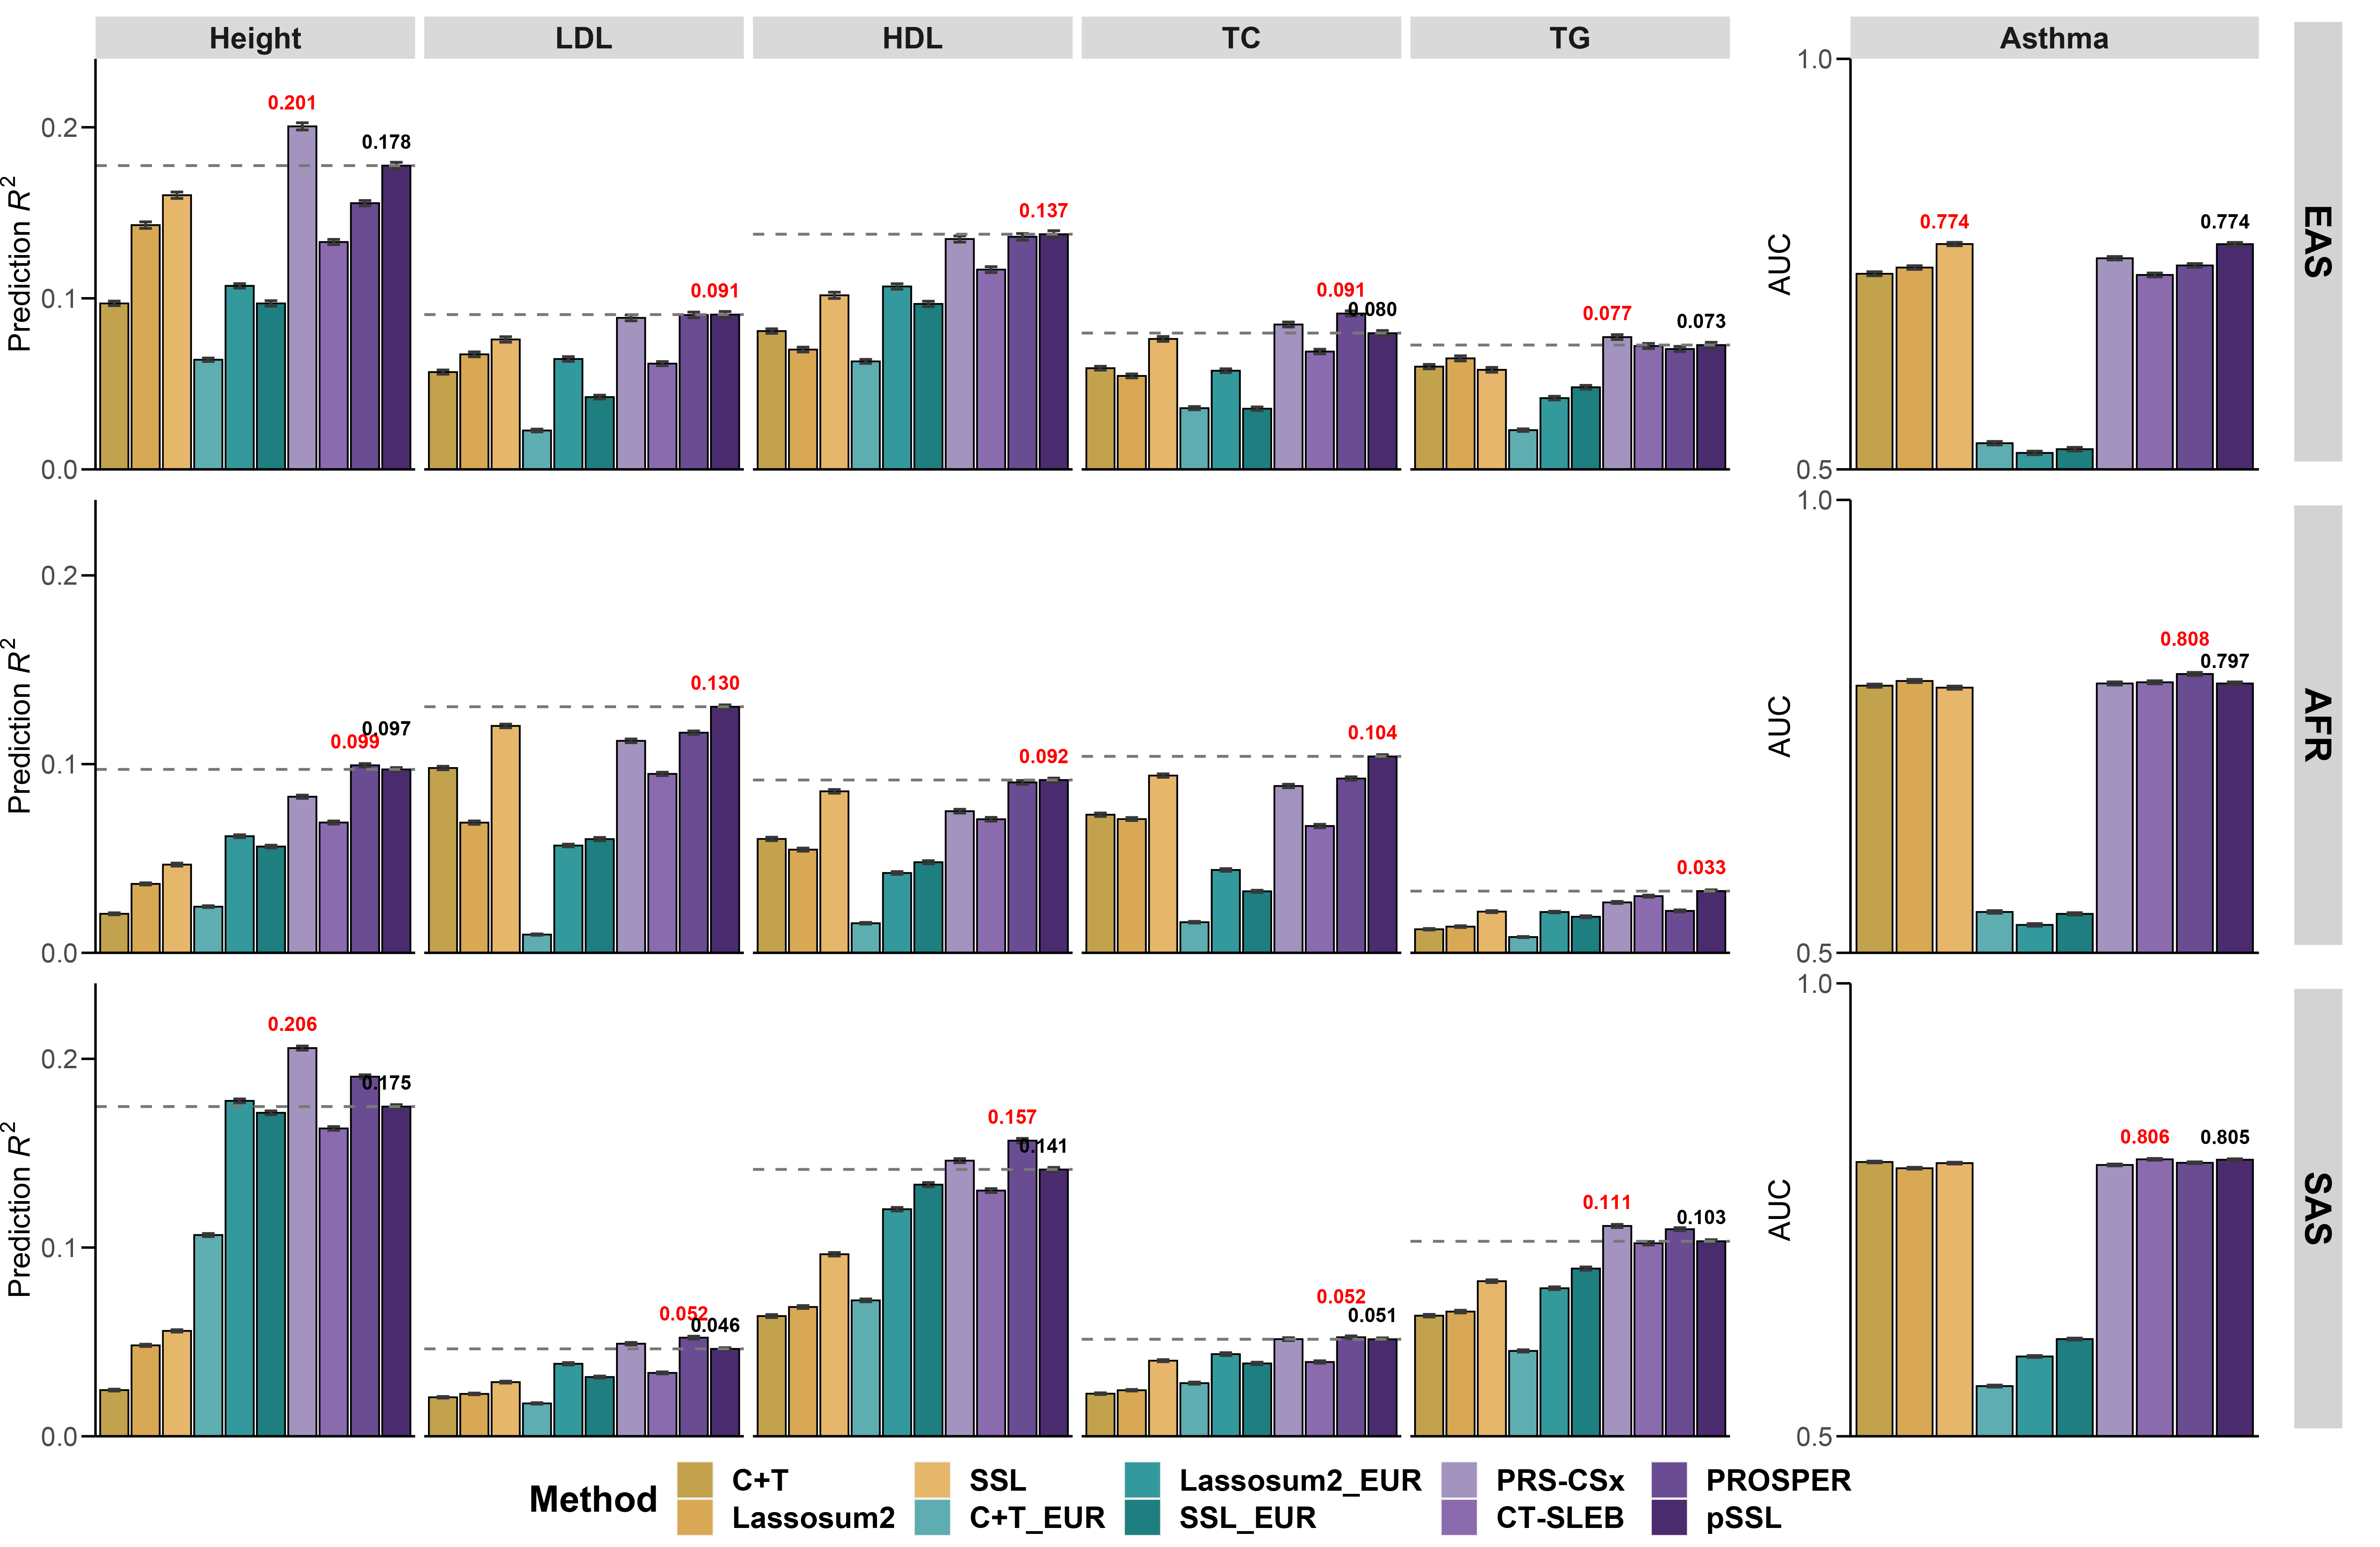


**Figure S10. Performance of cross-ancestry PGS methods for 6 complex traits in UKB.** The gray dashed line represents the performance of pSSL method and a red numeric label means the top-performing method.


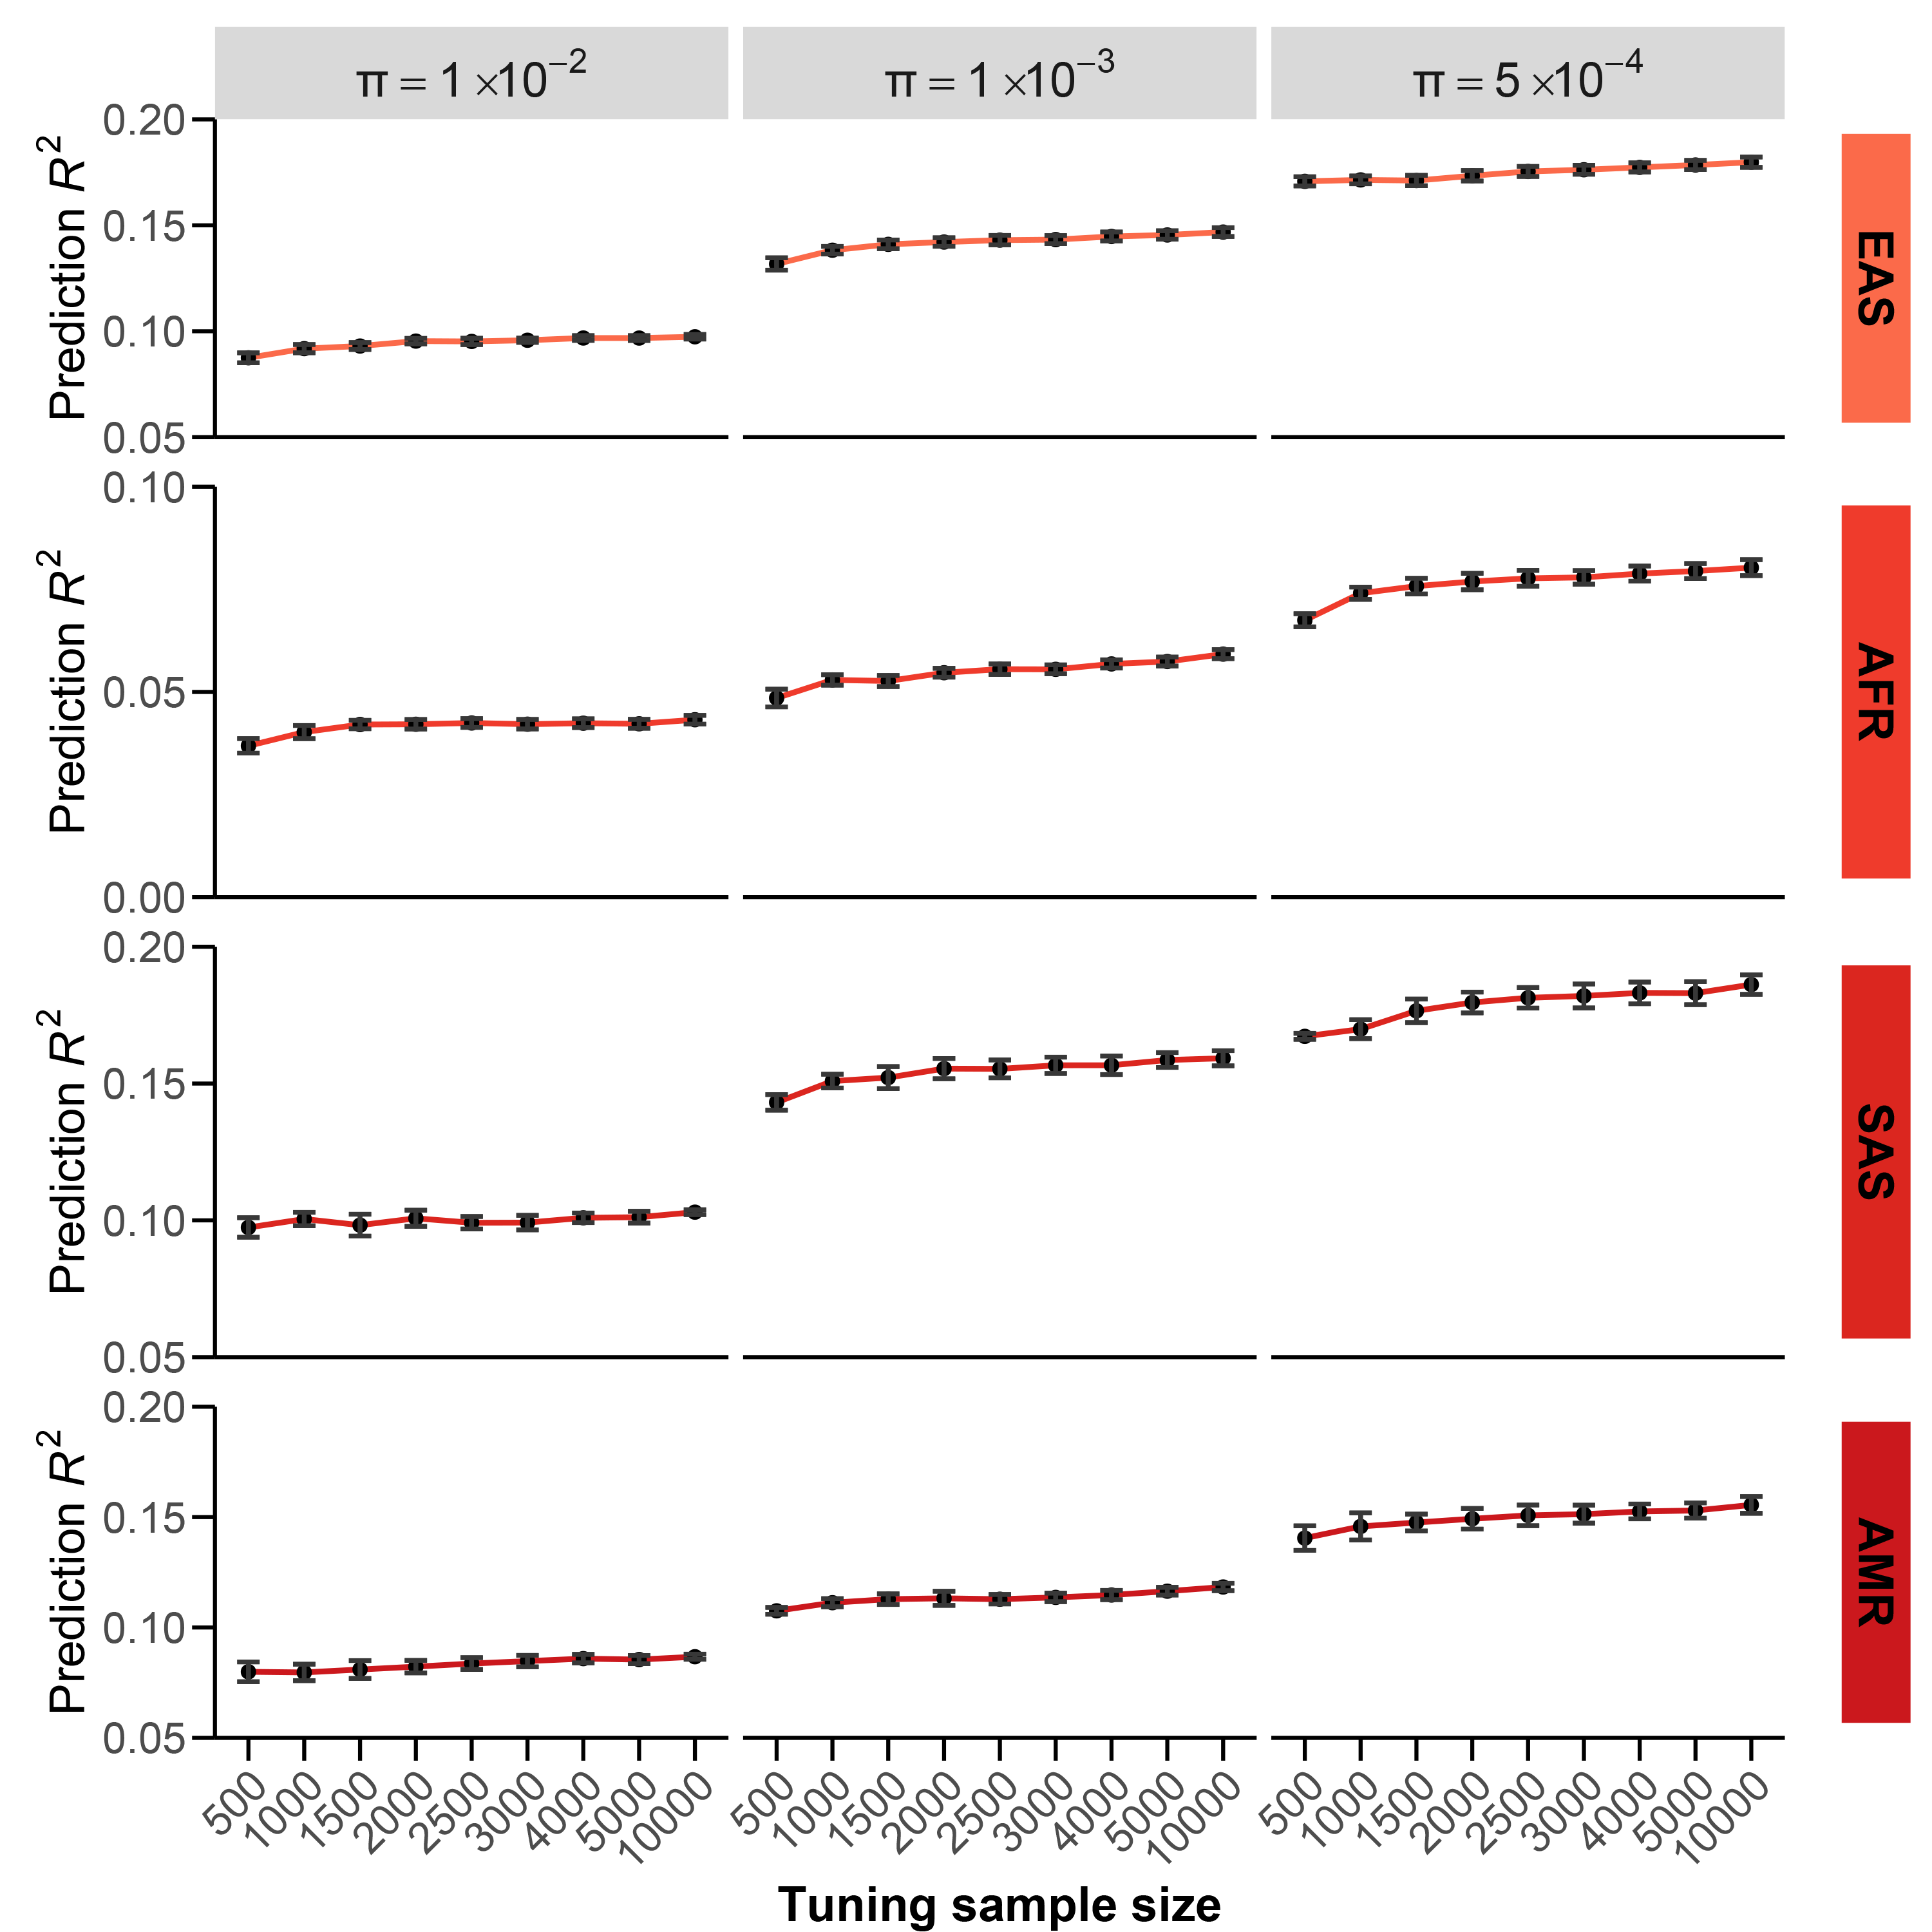


**Figure S11. The relation between tuning sample size and prediction *R*2 of the pSSL method.** Black plots and error bars indicated the mean and standard error (SE) of *R*² across 10 replicates. The pSSL method was tuned with sample size *n* {500, 1000, 1500, 2000, 2500, 3000, 4000, 5000, 10000}, and tested in *n* = 10000 independent samples in each target population. The simulation was performed under four populations, with a GWAS sample size of 15,000, proportion of causal SNPs = 10-2, constant genome-wide heritability, and cross-ancestry genetic correlation .


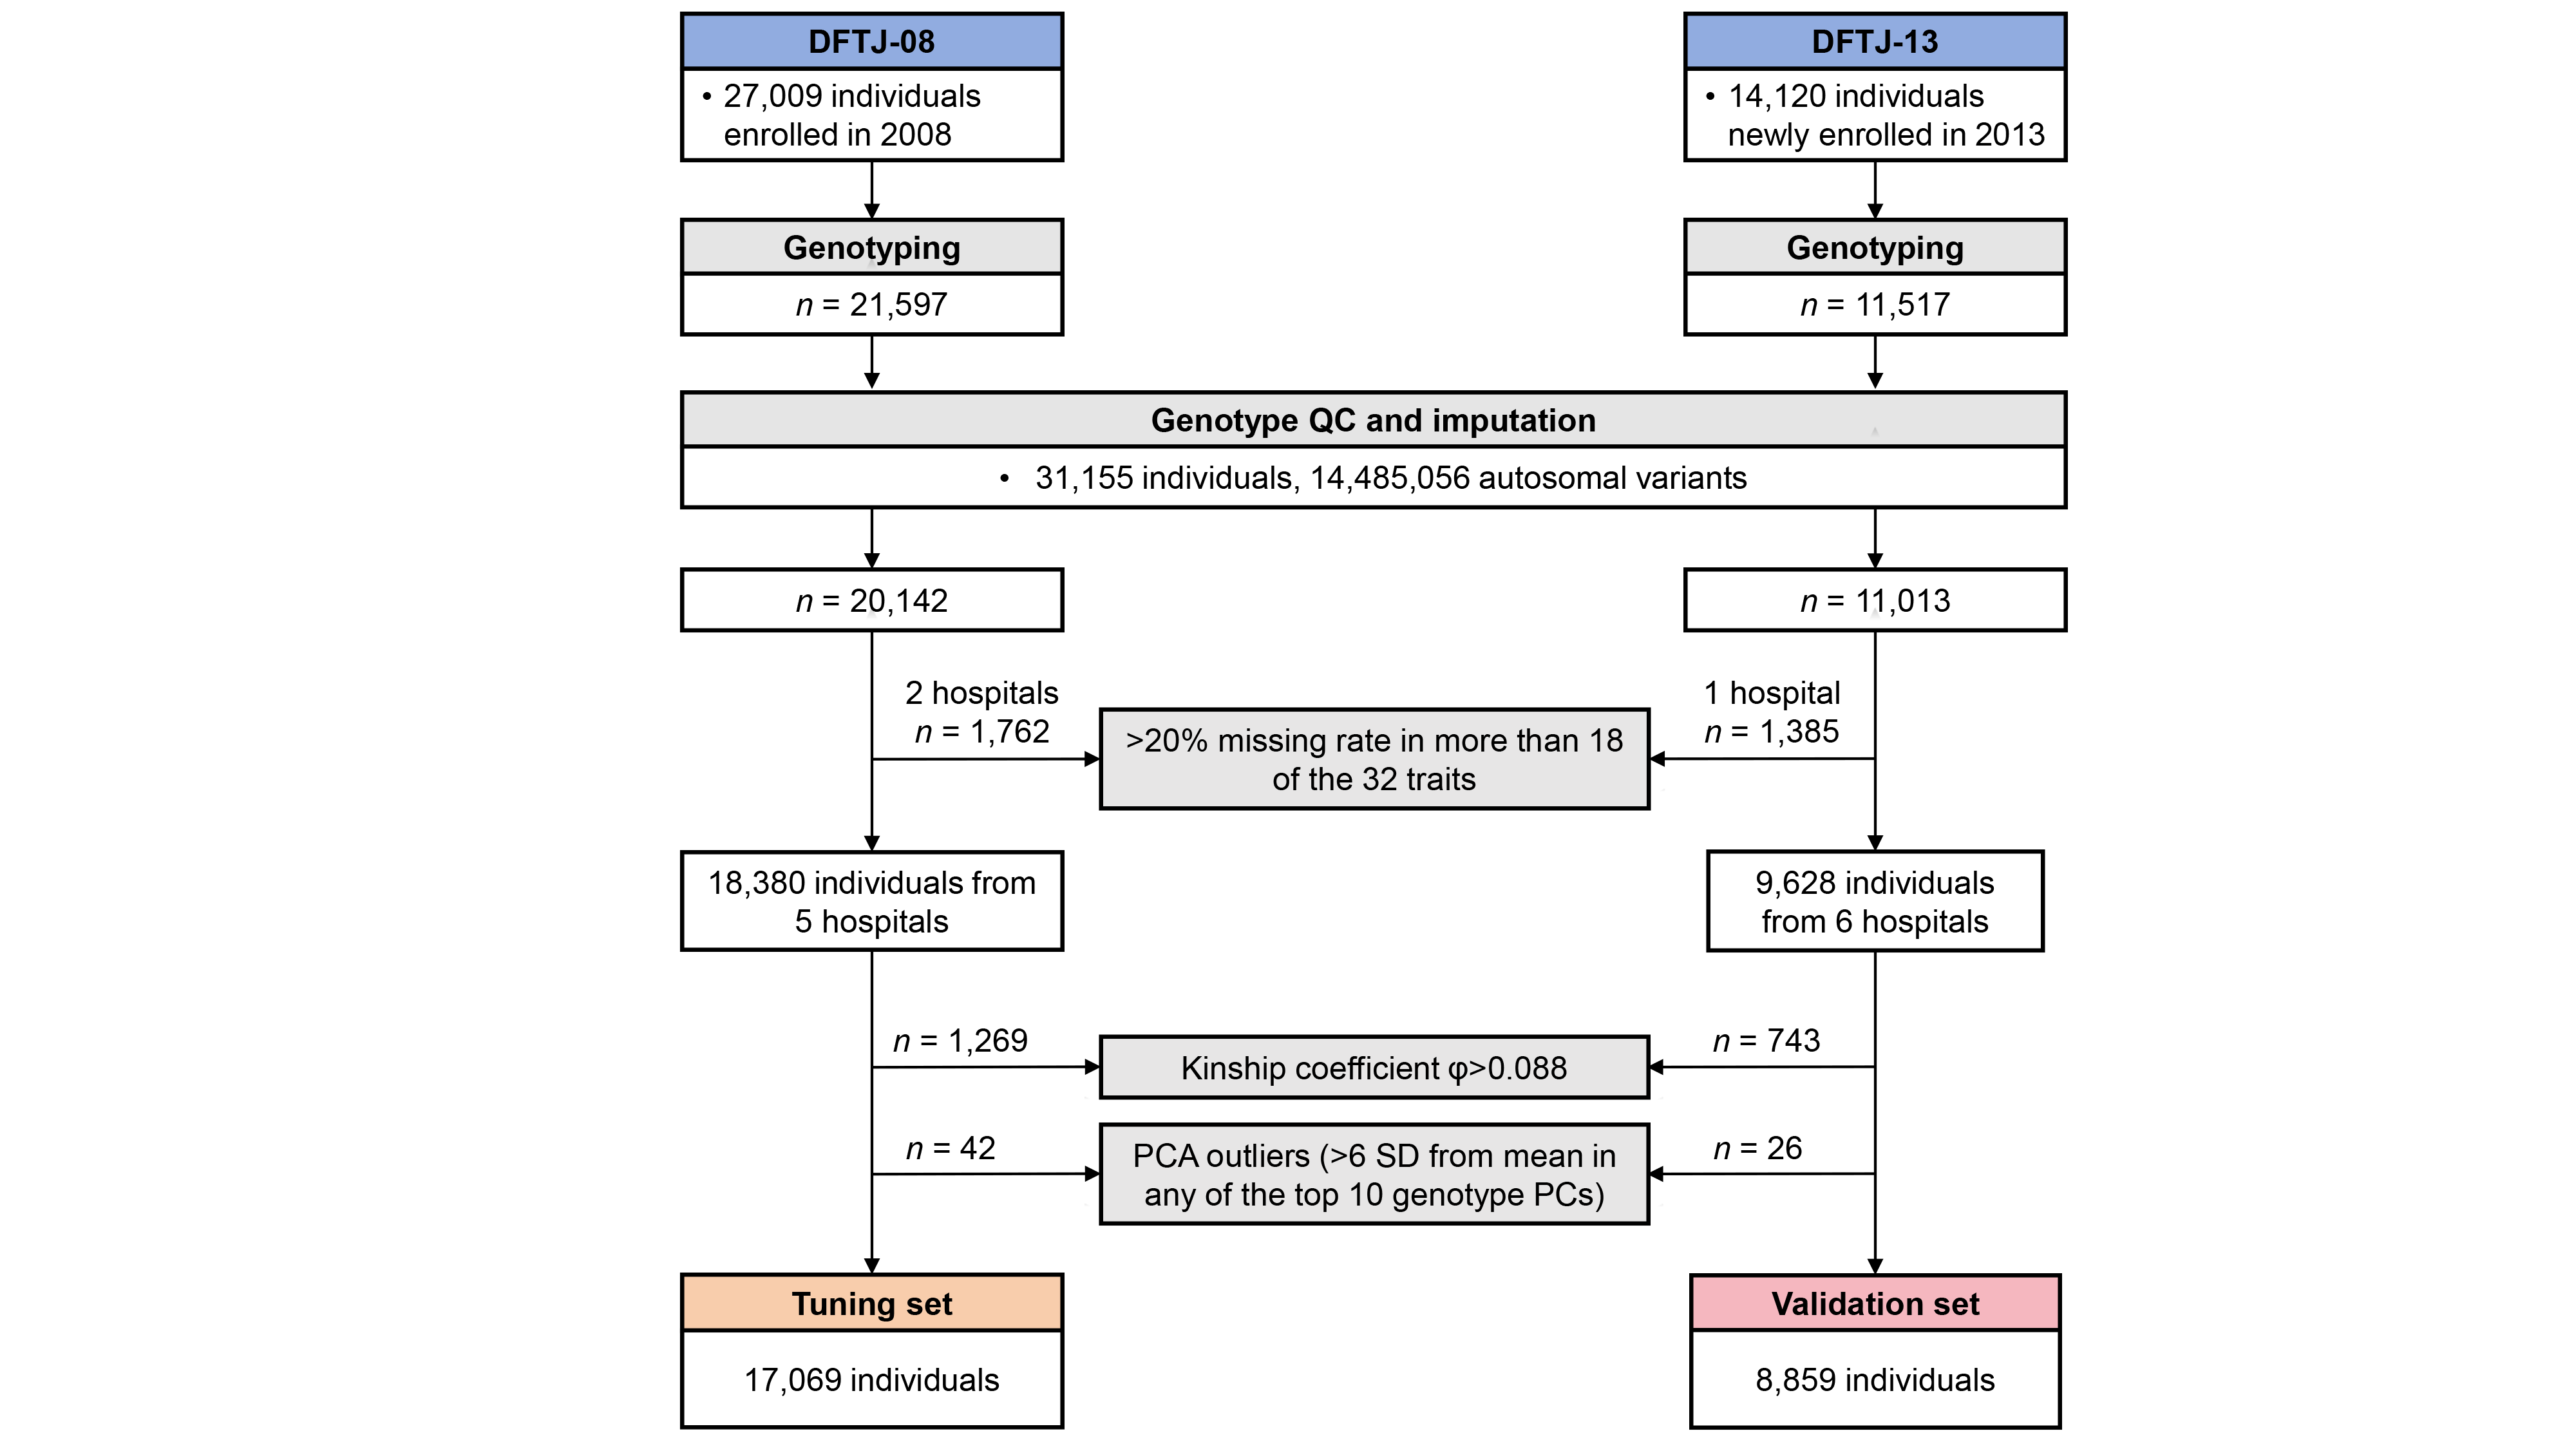


**Figure S12. Sample quality control process of the DFTJ cohort.** The calculation of the kinship coefficient is based on the combined samples of DFTJ-08 and DFTJ-13.

# Supplemental Tables

**Table S1. Simulation settings for single-ancestry PGS methods.**

| **Scenarios** | **GWAS sample size** | **Heritability** | **Genetic architectures** |
| --- | --- | --- | --- |
| **Sparse I** | 100,000 | 0.5 |  |
| **Sparse II** | 100,000 | 0.5 |  |
| **Sparse III** | 100,000 | 0.5 |  |
| **Infinitesimal** | 100,000 | 0.5 |  |
| **Hybrid I** | 100,000 | 0.5 | , , ,  , , |
| **Hybrid II** | 100,000 | 0.5 | , , ,  , , |
| **Hybrid III** | 100,000 | 0.5 | , , ,  , , |
| **Hybrid IV** | 100,000 | 0.5 | , , ,  , , |
| **GWAS N = 10,000** | 10,000 | 0.5 |  |
| **GWAS N = 50,000** | 50,000 | 0.5 |  |
| **Heritability = 0.2** | 100,000 | 0.2 |  |

Note: For sparse and infinitesimal model, denotes the proportion of causal SNPs. For hybrid models, , , and are the proportions of SNPs in large, medium, and small effect components, while , , and are the corresponding fractions of explained by each component.

**Table S2. Simulation settings for cross-ancestry PGS methods**

| **Parameters** | **Values** |
| --- | --- |
| **Target population** | EAS, AFR, SAS, AMR |
| **Auxiliary population** | EUR (fixed) |
| **GWAS sample size (target)** | 15,000; 80,000 |
| **GWAS sample size (auxiliary)** | 100,000 (fixed) |
| **Genetic architecture**a | **Scenario I**: constant genome-wide heritability, and .  **Scenario II**: constant per-SNP heritability, and .  **Scenario III**: constant per-SNP heritability, and . |
| **Proportion of causal SNPs** | 10-2, 10-3, 5×10-4 |

Note: We applied 72 simulation settings, arising from combinations of 4 target populations, 2 target GWAS sample sizes, 3 genetic architectures, and 3 causal SNP proportions (4×2×3×3=72). We simulated 10 independent replicates for each setting.

**Table S3. GWAS summary information of 32 continuous traits**

| **Traits** | **Description** | **EAS GWAS** |  |  | **EUR GWAS** |  |  |
| --- | --- | --- | --- | --- | --- | --- | --- |
| **source** | **sample** | ***h*2**a | **source** | **sample** | ***h*2**a |
| **Height** | Standing height | KoGES+BBJ | 231,383 | 0.365 | UKB+GIANT | 1,597,374 | 0.363 |
| **BMI** | Body mass index | KoGES+BBJ | 230,568 | 0.187 | UKB+GIANT | 484,680 | 0.275 |
| **Weight** | Weight | KoGES+BBJ | 230,568 | 0.221 | UKB | 354,838 | 0.244 |
| **Waist** | Waist circumference | KoGES | 72,222 | 0.162 | UKB | 354,838 | 0.192 |
| **SBP** | Systolic blood pressure | KoGES+BBJ | 208,862 | 0.087 | MVP+ICBP | 977,988 | 0.129 |
| **DBP** | Diastolic blood pressure | KoGES+BBJ | 208,880 | 0.070 | MVP+ICBP | 978,281 | 0.129 |
| **PP** | Pulse pressure | BBJ | 136,249 | 0.052 | MVP+ICBP | 977,943 | 0.111 |
| **HDL** | High-density lipoprotein | KoGES+BBJ | 142,954 | 0.191 | GLGC | 1,320,016 | 0.071 |
| **LDL** | Low-density lipoprotein | KoGES+BBJ | 144,998 | 0.087 | GLGC | 1,320,016 | 0.059 |
| **TC** | Total cholesterol | KoGES+BBJ | 200,602 | 0.088 | GLGC | 1,320,016 | 0.067 |
| **TG** | Triglycerides | KoGES+BBJ | 177,792 | 0.135 | GLGC | 1,320,016 | 0.062 |
| **BG**b | Blood glucose | KoGES+BBJ | 163,844 | 0.081 | UKB | 314,916 | 0.075 |
| **AST** | Aspartate aminotransferase | KoGES+BBJ | 204,826 | 0.086 | UKB | 342,990 | 0.127 |
| **ALP** | Alkaline phosphatase | BBJ | 105,030 | 0.113 | UKB | 344,292 | 0.209 |
| **ALT** | Alanine aminotransferase | KoGES+BBJ | 204,732 | 0.076 | UKB | 344,136 | 0.118 |
| **TBIL** | Total bilirubin | KoGES+BBJ | 160,081 | 0.074 | UKB | 342,829 | 0.107 |
| **RBC** | Red blood cell count | KoGES+BBJ | 163,158 | 0.176 | UKB+BCX | 545,203 | 0.211 |
| **MCV** | Mean corpuscular volume | BBJ | 108,256 | 0.176 | UKB+BCX | 544,127 | 0.263 |
| **MCH** | Mean corpuscular hemoglobin | BBJ | 108,054 | 0.156 | UKB+BCX | 486,823 | 0.250 |
| **MCHC** | Mean corpuscular  Hemoglobin concentration | BBJ | 108,054 | 0.059 | UKB+BCX | 491,553 | 0.088 |
| **HGB** | Hemoglobin | KoGES+BBJ | 179,412 | 0.102 | UKB+BCX | 563,946 | 0.159 |
| **HCT** | Hematocrit | KoGES+BBJ | 163,122 | 0.107 | UKB+BCX | 562,259 | 0.157 |
| **WBC** | White blood cell count | KoGES+BBJ | 162,328 | 0.156 | UKB+BCX | 562,243 | 0.175 |
| **LYM** | Lymphocytes | BBJ | 62,076 | 0.086 | UKB+BCX | 524,923 | 0.192 |
| **MONO** | Monocytes | BBJ | 62,076 | 0.091 | UKB+BCX | 521,594 | 0.218 |
| **NEUT** | Neutrophils | BBJ | 62,076 | 0.081 | UKB+BCX | 519,288 | 0.151 |
| **EOS** | Eosinophils | BBJ | 62,076 | 0.071 | UKB+BCX | 474,237 | 0.188 |
| **BASO** | Basophils | BBJ | 62,076 | 0.071 | UKB+BCX | 474,001 | 0.064 |
| **PLT** | Platelet count | KoGES+BBJ | 162,137 | 0.229 | UKB+BCX | 542,827 | 0.261 |
| **SCR** | Serum creatinine | BBJ | 142,097 | 0.107 | UKB | 344,104 | 0.182 |
| **BUN**c | Blood urea nitrogen | KoGES+BBJ | 212,104 | 0.088 | UKB | 344,052 | 0.107 |
| **SUA**c | Serum uric acid | BBJ | 109,029 | 0.142 | UKB | 343,836 | 0.162 |

**Note:** KoGES: Korean Genome and Epidemiology Study; BBJ: BioBank Japan; UKB: UK Biobank; GIANT: Genetic Investigation of Anthropometric Traits; MVP: Million Veteran Program; ICBP: International Consortium of Blood Pressure; GLGC: Global Lipids Genetics Consortium; BCX: Blood Cell Consortium. EUR: European; EAS: East Asian.

a: The heritability of each trait (*h*2) is estimated through LD score regression (LDSC)1.

b: Blood Glucose was measured in the fasting blood in DFTJ but in the non-fasting blood in UKB.

c: Because BUN and SUA were not available in UKB, we used the GWASs of urea (UKB Field 23476) and urate (UKB Field 30880) as their proxies, respectively.

**Table S4. GWAS summary information of 6 complex traits in UKB multiple population data**

| **Traits** | **Description** | **Ancestry** | ***N*GWAS** | **GWAS source** |
| --- | --- | --- | --- | --- |
| Height | Standing height | EUR | 1,177,601 | GIANT:  <https://giant-consortium.web.broadinstitute.org/GIANT_consortium_data_files> |
|  |  | EAS | 361,369 |
|  |  | AFR | 168,193 |
|  |  | SAS | 49,032 |
| HDL | High-density lipoprotein | EUR | 1,244,578 | GLGC: <https://csg.sph.umich.edu/willer/public/glgc-lipids2021/results/ancestry_specific> |
|  |  | EAS | 119,298 |
|  |  | AFR | 97,171 |
|  |  | SAS | 40,1173 |
| LDL | Low-density lipoprotein | EUR | 1,231,289 |
|  |  | EAS | 82,587 |
|  |  | AFR | 94,624 |
|  |  | SAS | 40,473 |
| TC | Total cholesterol | EUR | 1,320,016 |
|  |  | EAS | 146,492 |
|  |  | AFR | 99,432 |
|  |  | SAS | 40,963 |
| TG | Triglycerides | EUR | 1,253,277 |
|  |  | EAS | 83,965 |
|  |  | AFR | 96,343 |
|  |  | SAS | 40,846 |
| Asthma | Asthma case/control status | EUR | 121,940/1,254,131 | GBMI: <https://www.globalbiobankmeta.org/resources> |
|  |  | EAS | 18,549/322,655 |
|  |  | AFR | 5,051/27,607 |
|  |  | SAS | 4,015/27,091 |

**Note:** GIANT: Genetic Investigation of ANthropometric Traits; GLGC: Global Lipids Genetics Consortium; DIAGRAM: Diabetes Genetics Replication and Meta-analysis; GBMI: Genome-Biobank Meta-Analysis Initiative; EUR: European; EAS: East Asian; AFR: African; SAS: South Asian. ***N*GWAS**: GWAS sample (case/control for binary traits)

**Table S5. GWAS source information of 32 continuous traits.**

| **Traits** | **Ancestry** | **Source** | **Link** |
| --- | --- | --- | --- |
| Height, BMI | EUR | UKB+GIANT | <https://giant-consortium.web.broadinstitute.org/GIANT_consortium_data_files>. |
| Weight, Waist, BGa, AST, ALP, ALT, TBIL, SCR, BUNb, SUAb | EUR | UKB | <https://docs.google.com/spreadsheets/d/1kvPoupSzsSFBNSztMzl04xMoSC3Kcx3CrjVf4yBmESU/edit?pli=1&gid=178908679#gid=178908679>. |
| HDL, LDL, TC, TG | EUR | GLGC | <https://csg.sph.umich.edu/willer/public/glgc-lipids2021/results/ancestry_specific/> |
| SBP, DBP, PP | EUR | MVP+ICBP | MVP: <https://www.millenniumcohort.org/>;  ICBP:<https://ftp.ebi.ac.uk/pub/databases/gwas/summary_statistics/GCST006001-GCST007000/GCST006624/>; <https://ftp.ebi.ac.uk/pub/databases/gwas/summary_statistics/GCST006001-GCST007000/GCST006630/>; <https://ftp.ebi.ac.uk/pub/databases/gwas/summary_statistics/GCST006001-GCST007000/GCST006629/>. The two GWAS summary datasets were meta-analyzed using a fix-effects model. |
| RBC, MCV, MCH, MCHC, HGB, HCT, WBC, LYM, MONO, NEUT, EOS, BASO, PLT | EUR | UKB+BCX | <http://www.mhi-humangenetics.org/en/resources/> |
| All traits | EAS | KoGES+BBJ  or BBJ | <https://zenodo.org/records/7042518> |

**Note:** KoGES: Korean Genome and Epidemiology Study; BBJ: BioBank Japan; UKB: UK Biobank; GIANT: Genetic Investigation of Anthropometric Traits; MVP: Million Veteran Program; ICBP: International Consortium of Blood Pressure; GLGC: Global Lipids Genetics Consortium; BCX: Blood Cell Consortium. EUR: European; EAS: East Asian.

a: Blood Glucose was measured in the fasting state for the EAS population and in the non-fasting state for the EUR population.

b: As the UKB does not include direct measurements for Serum Uric Acid (SUA) or Blood Urea Nitrogen (BUN), we derived BUN from the urea (in mg/dL) (UKB Field 23476) using the standard conversion: BUN = Urea / 2.14, and SUA from directly applying urate (UKB Field 30880).

# Supplemental Methods

## Methods for comparison

In the single-ancestry setting, we compared SSL method with nine methods: C+T2,3, uaPGS4, LDpred2_inf5, LDpred2_auto5, PRS-CS4, PRS-CSauto4, Lassosum6, Lassosum27 and Allsum8. For C+T, we performed clumping and thresholding using PLINK 1.99 to select independent SNPs based on GWAS summary statistics, where we clump SNPs with *r2* > 0.1 in 1 MB windows, and considered tuning parameter *Pt* in {5×10-8, 10-6, 10-4, 10-3, 10-2, 0.05, 0.1, 0.2, 0.5, 1}. uaPGS sums all SNPs across the genome, weighted by the marginal effect sizes from GWAS summary statistics, corresponding to the simplest infinitestimal model. We used the R package bigsnpr (v.1.12.2) to implement LDpred2_inf and LDpred2_auto, both of which do not require tuning samples. The parameter , representing the fraction of causal variants, was set to 1 for LDpred2_inf, and to a sequence of 4 values equally spaced on the log scale between 10-4 and 0.9 for LDpred2_auto. We used PRS-CS (v.1.1.0) to implement PRS-CS and PRS-CSauto, both with the default hyper-parameters *a* = 1and *b* = 0.5. For the PRS-CS, the global shrinkage parameter was chosen from {10-6, 10-4, 10-2, 1}. PRS-CSauto model requires neither specification of nor a separate tuning sample. Lassosum was implemented using the R package lassosum (v.0.4.5), with the penalty parameter chosen from a sequence of 20 values evenly spaced on the logarithmic scale between 0.1 and 1, and the regularization parameter chosen from {0.2, 0.5, 0.9, 1}. Lassosum2 was implemented using the R package bigsnpr (v.1.12.2), with parameter chosen from a sequence of 30 values that evenly spaced on the logarithmic scale between and , where is the pseudocorrelation estimate of the *j*th SNP, and regularization parameter from {10-3, 10-2, 0.1, 1}. ALL‑Sum is a two‑stage penalized regression method that first solves an L0L2-penalized least-squares problem using summary statistics and a block‑diagonal LD matrix, obtaining effect estimates for a grid of via fast coordinate descent, and then ensembles these candidate PGSs in a tuning dataset using cross‑validated Lasso regression to produce a final aggregated PGS. To speed up computation, Lassosum, ALL-Sum, Lassosum2, LDpred2_inf, and LDpred2_auto estimate SNP effects in nearly independent LD blocks. Lassosum and ALL-Sum use LD blocks defined by LDetect10, while the other three methods assume that variants more than 3 cM away are not correlated.

In the cross-ancestry setting, we compared pSSL with single-ancestry methods trained in the target population (C+T, Lassosum2, and SSL), single-ancestry methods trained in the EUR population (C+T_EUR, Lassosum2_EUR, and SSL_EUR), and cross-ancestry methods (PRS-CSx11, CT-SLEB12, and PROSPER13). PRS-CSx (v.1.1.0) was implemented with the global shrinkage parameter chosen from {10-6, 10-4, 10-2, 1}. CT-SLEB was implemented with the *P*-value threshold chosen from {5×10-8, 5×10-7, …, 5×10-1, 1}, clumping window size from {50kb, 100kb}, and the LD *r*2 cutoff from {0.01, 0.05, 0.1, 0.2, 0.5}. We performed PROSPER with a command line tool. The lasso penalty parameter was chosen from 5 values evenly spaced on the logarithmic scale between and , where is the GWAS marginal effects for *k*th SNP in the *i*th population, and is the optimal value of in the *i*th population. The genetic similarity penalty parameter *c* was set to a sequence of 5 values evenly spaced on the quad-root scale between = 2 and = 100.

## Genotyping and quality control for UKB and DFTJ

We performed real data applications based on genotype and phenotype data from the UKB and DFTJ data. The UKB cohort is a population-based cohort individuals recruited at 22 centers across the UK. We used the imputed genotypes from UUKB. Details of the design of the array, sample processing and quality control have been described in detail elsewhere14. We extracted a European ancestry subset (420,531 individuals) based on the Pan-UKB ancestry classification, which assigned individuals into six continental ancestry groups using Data‑Coding 252315 (coding 5 for European). This European ancestry group (EUR) served as the base population for our analyses. In addition to the European ancestry subset, we also extracted target populations from other ancestry groups, including subsets of East Asian (EAS, N = 2,709, Data‑Coding 2523 coding 4), Central/South Asian (CSA, N = 8,876, Data‑Coding 2523 coding 3; hereinafter referred to as South Asian [SAS] in this study), and African (AFR, N = 6,636, Data‑Coding 2523 coding 1) ancestries. For each population, we randomly selected half of the individuals for tuning and the remaining half for validation. Similar to our previous studie16, we excluded the variants with minor allele frequency (MAF) <0.001, Hardy–Weinberg equilibrium test *P* value < 1.0×10-12, missing genotype rate > 0.05, or imputation accuracy score < 0.3 by PLINK 2.017. Finally, approximately 1.1 million HapMap3 variants were retained for the following study. The application number of UKB in our study was 88,159.

The DFTJ cohort was based on the retired employees from the Dongfeng Motor Company in Shiyan, Hubei, China18, recruiting 27,009 participants in 2008 and have completed two follow-up visits in 2013 and 2018. In 2013, 24,175 participants were followed up and 14,120 participants were newly enrolled. All participants completed both face-to-face questionnaires and physical examinations in eight hospitals after an over-night fasting. For this study, we genotyped 33,114 samples from the DFTJ cohort using the Infinium OmniZhongHua-8 v1.4 Beadchip (Illumina). Quality controls and genotype imputation of these data have been described previously19. The quality-controlled genotype dataset consisted of 31,155 individuals, among whom 20,142 were recruited in 2008 and 11,013 were newly enrolled in 2013 (**Figure S12**). We kept 14,516,528 autosomal variants with imputation R2 > 0.3 and minor allele frequency (MAF) > 0.001 for downstream analyses. We excluded data from two hospitals in 2008 and one hospital in 2013 due to high missing rate (> 20%) in more than 18 of the 32 traits. As shown in Figure S2, we further excluded individuals with close relatedness (kinship coefficient > 0.088), and outliers identified by principal component analysis (PCA) on the genotyping data (> 6 SD from the mean in any of the top ten PCs). The final dataset consisted of 25,928 individuals with both genotype and phenotype data, including 17,069 individuals recruited in 2008, and 8,859 newly recruited in 2013. We retained approximately 1.1 million HapMap3 variants for the final analysis. The cohort entry date is defined as the date of blood collection for each participant. All participants provided written informed consent. The study protocol was approved by the Medical Ethics Committee of Tongji Medical College, Huazhong University of Science and Technology.

# References

1. Bulik-Sullivan, B.K. *et al.* LD Score regression distinguishes confounding from polygenicity in genome-wide association studies. *Nature Genetics* **47**, 291-295 (2015).

2. The International Schizophrenia Consortium, P.S., Wray NR. Common polygenic variation contributes to risk of schizophrenia and bipolar disorder. *Nature* **460**, 748-752 (2009).

3. Euesden, J., Lewis, C.M. & O’Reilly, P.F. PRSice: Polygenic Risk Score software. *Bioinformatics* **31**, 1466-1468 (2015).

4. Ge, T., Chen, C.-Y., Ni, Y., Feng, Y.-C.A. & Smoller, J.W. Polygenic prediction via Bayesian regression and continuous shrinkage priors. *Nature Communications* **10**(2019).

5. Privé, F., Arbel, J., Vilhjálmsson, B.J. & Schwartz, R. LDpred2: better, faster, stronger. *Bioinformatics* **36**, 5424-5431 (2020).

6. Mak, T.S.H., Porsch, R.M., Choi, S.W., Zhou, X. & Sham, P.C. Polygenic scores via penalized regression on summary statistics. *Genetic Epidemiology* **41**, 469-480 (2017).

7. Privé, F., Arbel, J., Aschard, H. & Vilhjálmsson, B.J. Identifying and correcting for misspecifications in GWAS summary statistics and polygenic scores. *Human Genetics and Genomics Advances* **3**(2022).

8. Chen, T., Zhang, H., Mazumder, R. & Lin, X. Ensembled best subset selection using summary statistics for polygenic risk. (2023).

9. Purcell, S. *et al.* PLINK: A Tool Set for Whole-Genome Association and Population-Based Linkage Analyses. *The American Journal of Human Genetics* **81**, 559-575 (2007).

10. Berisa, T. & Pickrell, J.K. Approximately independent linkage disequilibrium blocks in human populations. *Bioinformatics* **32**, 283-285 (2016).

11. Ruan, Y. *et al.* Improving polygenic prediction in ancestrally diverse populations. *Nature Genetics* **54**, 573-580 (2022).

12. Zhang, H. *et al.* A new method for multiancestry polygenic prediction improves performance across diverse populations. *Nature Genetics* **55**, 1757-1768 (2023).

13. Zhang, J. *et al.* An ensemble penalized regression method for multi-ancestry polygenic risk prediction. *Nature Communications* **15**(2024).

14. Bycroft, C. *et al.* The UK Biobank resource with deep phenotyping and genomic data. *Nature* **562**, 203-209 (2018).

15. Karczewski, K.J. *et al.* Pan-UK Biobank genome-wide association analyses enhance discovery and resolution of ancestry-enriched effects. *Nature Genetics* **57**, 2408-2417 (2025).

16. Hao, X. *et al.* Integrative genome-wide analyses identify novel loci associated with kidney stones and provide insights into its genetic architecture. *Nature Communications* **14**(2023).

17. Chang, C.C. *et al.* Second-generation PLINK: rising to the challenge of larger and richer datasets. *Gigascience* **4**(2015).

18. Wang, F. *et al.* Cohort Profile: The Dongfeng–Tongji cohort study of retired workers. *International Journal of Epidemiology* **42**, 731-740 (2013).

19. Jiang Y, Q.M., Jiang M, Jiang X, Fernandez S, Porter T, Laws SM, Masters CL, Guo H, Cheng S, Wang C. MethylGenotyper: Accurate Estimation of SNP Genotypes and Genetic Relatedness from DNA Methylation Data. *Genomics Proteomics Bioinformatics.* **13;22(3):qzae044.** (2024).
